# Supplementary material for: In vivo study of gene expression with an enhanced dual-color fluorescent transcriptional timer
Source: eLife. 2019 May 29;8:e46181. doi: 10.7554/eLife.46181 (PMC6660218; doi:10.7554/eLife.46181)
Supplement: Figure 2—figure supplement 1—source data 1. [file elife-46181-fig2-figsupp1-data1.xlsx]

## Sheet: Sheet1
	0 hr		1 hr		2 hr		3 hr		4 hr		5 hr		6 hr
	RFP	dGFP	RFP	dGFP	RFP	dGFP	RFP	dGFP	RFP	dGFP	RFP	dGFP	RFP	dGFP
	90	143	18	22	22	18	44	1	21	1	21	1	54	1
	46	85	29	19	80	96	69	26	43	18	43	18	46	1
	34	72	65	68	79	63	43	26	18	3	18	3	65	1
	83	169	21	46	85	49	93	38	96	1	96	1	81	38
	49	78	53	75	19	6	111	18	77	9	77	9	24	0
	61	70	77	8	81	36	58	79	41	7	41	7	30	1
	33	165	44	41	76	76	58	31	22	4	22	4	36	21
	20	9	73	26	31	19	64	41	63	7	63	7	65	6
	59	24	37	35	79	89	99	62	59	4	59	4	69	7
	20	41	21	1	51	54	30	20	86	59	86	59	35	7
	31	17	26	28	44	31	40	15	18	1	18	1	51	3
	21	31	75	63	37	23	30	5	30	6	30	6	25	1
	20	81	70	52	40	48	58	19	39	3	39	3	24	1
	30	36	26	38	47	45	42	26	47	0	47	0	66	11
	65	158	41	78	20	54	72	21	51	11	51	11	41	1
	24	26	42	42	18	12	70	25	76	48	76	48	34	0
	67	126	31	17	32	20	26	0	58	4	58	4	51	4
	50	77	48	82	67	22	34	11	21	1	21	1	41	0
	83	148	46	63	40	18	22	2	78	16	78	16	20	6
	26	53	30	55	57	26	73	18	51	4	51	4	22	1
	66	175	49	20	44	46	69	43	21	9	21	9	80	3
	56	44	24	1	46	16	89	9	19	1	19	1	17	3
	23	37	51	83	45	24	92	22	86	14	86	14	67	23
	67	139	96	45	61	52	45	0	73	21	73	21	31	70
	62	135	58	56	54	5	65	40	31	0	31	0	73	18
	40	51	53	92	49	5	77	27	36	6	36	6	62	1
	18	26	56	83	59	32	108	24	43	0	43	0	27	0
	68	107	34	51	59	35	54	10	32	1	32	1	58	1
	29	116	26	72	26	35	25	8	54	1	54	1	34	4
	23	1	21	50	57	7	43	1	47	9	47	9	40	1
	34	38	56	100	62	49	32	0	29	35	29	35	34	0
	41	43	28	18	70	45	49	48	39	4	39	4	83	1
	32	89	66	91	70	26	56	14	35	7	35	7	19	0
	31	135	35	51	32	39	93	26	42	7	42	7	44	45
	44	146	46	65	24	29	27	0	40	38	40	38	43	7
	29	84	81	106	52	32	55	49	34	11	34	11	46	1
	68	104	56	31	58	40	53	22	25	3	25	3	25	0
	34	105	53	50	40	9	45	37	28	1	28	1	84	1
	27	135	51	59	46	4	72	61	28	1	28	1	18	1
	28	23	57	70	76	65	46	7	34	0	34	0	30	0
	43	112	80	29	66	50	93	72	59	4	59	4	82	7
	34	4	27	26	37	39	62	36	30	0	30	0	68	3
	49	23	37	70	49	12	78	34	82	16	82	16	54	9
	46	121	31	1	42	11	64	17	65	4	65	4	69	0
	90	179	98	82	37	15	87	65	17	1	17	1	70	1
	33	60	21	68	18	10	92	59	22	1	22	1	23	0
	59	158	42	79	29	11	66	72	26	4	26	4	70	4
	44	36	24	156	55	26	64	31	80	21	80	21	18	0
	22	16	60	69	75	22	67	41	21	0	21	0	37	0
	59	99	44	70	51	11	24	0	23	4	23	4	24	4
	77	159	49	60	21	2	30	71	64	11	64	11	23	4
	62	60	83	118	56	61	40	9	77	0	77	0	13	0
	50	97	80	48	37	41	38	0	38	4	38	4	33	0
	91	163	41	67	68	16	78	12	38	7	38	7	38	3
	50	6	54	70	21	11	58	71	45	48	45	48	28	1
	28	54	70	91	15	11	56	27	73	7	73	7	20	1
	48	45	54	57	28	1	77	32	23	6	23	6	33	1
	74	65	21	12	22	50	40	14	49	1	49	1	21	0
	23	53	78	34	56	39	23	0	69	35	69	35	35	0
	70	122	62	71	41	2	81	14	62	14	62	14	48	16
	18	7	27	13	69	127	52	1	31	1	31	1	17	0
	46	40	29	1	50	50	36	7	34	1	34	1	68	1
	70	107	18	25	62	6	61	9	32	3	32	3	79	21
	36	43	50	3	31	14	45	25	64	14	64	14	19	1
	49	71	50	20	22	40	85	35	53	1	53	1	52	9
	21	20	32	32	72	25	102	12	21	11	21	11	24	0
	72	139	91	69	20	1	55	17	42	11	42	11	19	0
	44	99	72	71	32	14	77	28	73	14	73	14	21	1
	68	168	54	31	28	13	56	10	34	1	34	1	30	3
	60	92	24	7	29	3	53	4	36	9	36	9	23	0
	39	129	55	68	62	53	46	9	51	9	51	9	63	7
	55	101	28	2	67	20	48	19	64	7	64	7	18	0
	64	118	32	4	78	84	51	21	73	38	73	38	45	14
	35	68	76	42	22	10	86	22	70	7	70	7	36	3
	49	98	79	60	52	21	82	72	61	4	61	4	37	1
	74	145	13	8	59	45	62	36	61	52	61	52	51	1
	30	99	81	104	48	78	28	0	86	14	86	14	63	11
	48	153	81	105	74	65	64	3	25	0	25	0	86	29
	23	45	41	16	31	20	35	42	59	7	59	7	66	1
	24	62	33	84	49	30	79	29	59	6	59	6	82	1
	68	44	74	117	57	11	33	6	46	3	46	3	27	1
	19	95	62	42	66	19	54	2	54	38	54	38	46	1
	51	170	33	96	76	55	22	7	25	1	25	1	36	3
	27	34	55	24	40	0	70	46	27	41	27	41	30	6
	22	65	54	39	27	8	64	3	21	3	21	3	16	4
	28	55	79	92	36	51	36	19	32	4	32	4	18	0
	73	111	26	107	35	2	27	0	25	7	25	7	81	11
	26	151	61	92	73	33	32	10	85	14	85	14	66	23
	21	38	51	74	69	72	55	25	60	23	60	23	22	6
	27	141	26	19	32	8	56	24	87	1	87	1	27	1
	19	30	21	33	75	56	47	15	82	3	82	3	68	32
	35	53	21	45	56	51	32	0	99	95	99	95	35	23
	27	60	34	36	29	12	84	33	19	1	19	1	26	3
	46	87	41	73	35	26	22	0	57	1	57	1	28	1
	29	48	67	87	39	11	80	11	18	11	18	11	40	7
	41	54	28	15	30	26	57	35	56	23	56	23	73	11
	44	84	33	113	23	13	32	20	58	23	58	23	23	0
	40	60	19	17	64	32	32	9	26	6	26	6	22	0
	55	141	25	15	42	52	26	1	23	1	23	1	50	1
	35	148	26	8	17	25	52	4	80	26	80	26	16	1
	27	20	20	95	88	53	86	0	84	55	84	55	27	0
	68	111	82	46	20	11	57	76	49	23	49	23	55	9
	51	68	46	19	21	21	26	18	50	7	50	7	19	3
	41	107	93	75	56	20	42	16	50	14	50	14	19	1
	23	38	69	39	26	8	75	12	70	45	70	45	18	9
	26	128	34	15	43	44	84	23	27	1	27	1	53	7
	68	58	46	24	43	16	54	7	19	1	19	1	35	221
	33	91	67	132	21	0	103	65	34	1	34	1	70	14
	23	62	77	75	57	81	77	5	36	1	36	1	23	0
	50	125	57	87	66	39	78	12	69	11	69	11	50	0
	35	169	50	4	65	68	50	0	72	9	72	9	48	0
	17	44	18	63	61	19	29	3	51	35	51	35	47	1
	41	57	26	91	71	78	43	8	51	7	51	7	13	0
	30	115	81	56	52	59	27	29	27	0	27	0	21	4
	77	175	42	32	20	6	57	10	104	70	104	70	24	1
	54	116	22	22	38	16	32	0	52	23	52	23	39	3
	22	47	40	5	25	0	102	43	37	1	37	1	35	7
	41	67	79	60	34	24	51	23	101	1	101	1	44	0
	62	101	23	58	92	43	35	2	47	1	47	1	25	1
	40	72	81	100	30	18	86	23	63	3	63	3	29	0
	75	109	55	70	72	52	42	15	57	0	57	0	49	14
	52	68	106	69	40	58	48	7	23	1	23	1	70	3
	32	70	20	14	18	1	74	51	39	4	39	4	22	9
	61	102	55	117	57	36	49	2	76	35	76	35	76	3
	48	87	65	65	55	56	40	2	33	14	33	14	63	1
	72	132	49	19	15	0	35	6	40	4	40	4	44	3
	24	82	17	126	29	24	84	18	61	26	61	26	60	3
	59	94	83	60	59	72	32	10	30	66	30	66	18	0
	40	57	19	18	51	34	72	19	27	4	27	4	61	3
	41	173	54	6	20	0	52	0	82	16	82	16	16	0
	41	101	45	32	27	15	33	0	63	4	63	4	41	3
	73	141	62	61	79	84	55	24	24	4	24	4	80	18
	63	128	62	39	91	99	64	18	51	6	51	6	18	1
	46	98	24	15	45	52	89	72	25	1	25	1	56	3
	22	4	18	14	44	11	90	111	35	1	35	1	49	32
	41	36	53	69	66	47	72	46	22	1	22	1	25	1
	81	138	40	6	57	66	50	20	27	1	27	1	67	4
	56	112	41	88	64	97	58	14	85	7	85	7	30	4
	29	33	73	81	26	16	58	13	87	41	87	41	63	1
	66	70	71	113	51	41	61	0	71	1	71	1	61	3
	39	114	29	36	16	8	88	25	32	1	32	1	56	3
	95	139	66	64	47	39	53	29	46	3	46	3	82	4
	20	57	29	4	52	38	68	8	92	38	92	38	25	7
	24	118	21	7	76	81	51	17	32	1	32	1	58	0
	74	136	23	20	56	30	35	0	46	11	46	11	16	0
	35	34	38	4	54	65	95	31	34	1	34	1	25	0
	59	65	27	83	42	16	30	10	85	29	85	29	18	7
	30	38	29	39	89	83	53	14	34	0	34	0	22	7
	17	37	28	76	71	63	31	0	67	11	67	11	51	7
	75	131	30	7	24	24	68	7	34	1	34	1	41	1
	22	18	37	55	69	97	32	7	103	74	103	74	15	0
	40	85	46	45	73	73	38	5	31	0	31	0	34	3
	84	119	28	145	59	68	66	28	97	38	97	38	21	7
	60	128	76	59	62	20	86	12	36	6	36	6	49	3
	25	94	44	29	24	2	48	8	51	0	51	0	35	1
	86	38	67	80	25	7	36	25	21	26	21	26	22	0
	49	67	45	33	74	53	92	34	62	6	62	6	41	4
	65	128	55	6	49	19	66	35	38	1	38	1	45	6
	54	82	23	58	65	102	70	38	20	0	20	0	53	3
	36	37	24	1	35	0	35	0	57	1	57	1	77	4
	37	38	38	55	76	55	24	0	35	0	35	0	24	4
	34	16	45	49	52	34	35	6	66	63	66	63	31	1
	80	114	67	76	43	22	29	1	55	1	55	1	43	1
	17	67	24	97	38	31	36	0	63	52	63	52	15	7
	17	41	55	33	60	31	61	21	43	3	43	3	21	55
	47	80	30	38	24	55	45	11	81	21	81	21	76	32
	23	74	43	22	55	53	73	23	60	32	60	32	25	0
	23	7	15	129	49	13	18	8	78	52	78	52	46	6
	28	74	92	48	20	0	70	67	88	4	88	4	42	9
	49	58	57	65	41	27	32	2	30	18	30	18	43	6
	57	101	16	20	86	63	83	50	61	1	61	1	72	1
	19	30	24	42	40	7	59	19	75	14	75	14	50	11
	23	4	59	88	76	84	71	38	70	1	70	1	67	29
	52	101	27	29	28	31	52	19	26	1	26	1	42	1
	23	48	47	27	71	17	27	8	40	3	40	3	17	1
	33	71	49	82	27	7	52	24	63	136	63	136	25	1
	50	85	45	75	65	64	58	49	32	0	32	0	21	0
	23	14	34	91	21	3	31	1	54	6	54	6	36	1
	38	78	27	11	49	48	61	23	21	82	21	82	72	1
	95	119	20	24	21	12	50	3	19	1	19	1	25	1
	21	114	82	99	30	8	76	8	71	29	71	29	22	1
	85	173	49	73	48	8	101	30	42	1	42	1	22	1
	94	175	17	3	22	6	68	32	91	38	91	38	75	1
	26	48	55	22	39	29	75	22	24	6	24	6	19	1
	59	170	62	3	83	81	87	52	62	52	62	52	39	1
	23	109	64	76	30	20	47	46	54	7	54	7	59	23
	76	124	54	74	20	20	43	34	23	4	23	4	64	82
	23	57	31	4	55	110	64	24	30	0	30	0	48	1
	56	124	59	61	77	46	27	14	106	3	106	3	24	3
	39	87	29	23	43	34	69	49	77	4	77	4	22	6
	71	108	40	31	45	19	94	112	44	3	44	3	24	1
	23	51	19	46	74	54	42	38	21	0	21	0	80	18
	30	88	97	120	52	3	26	0	31	7	31	7	44	3
	70	107	22	15	22	27	113	58	98	23	98	23	46	1
	77	146	48	35	51	29	59	6	29	0	29	0	28	4
	59	138	47	111	31	17	39	27	68	45	68	45	23	4
	18	78	57	84	34	4	42	33	36	16	36	16	34	29
	46	104	30	101	37	9	42	81	63	3	63	3	26	32
	36	57	23	10	70	55	33	30	54	11	54	11	103	6
	95	97	26	36	21	1	59	25	34	0	34	0	27	0
	50	112	59	24	34	69	20	0	26	23	26	23	20	0
	90	162	27	7	29	19	53	7	42	6	42	6	75	16
	18	40	27	25	66	58	89	33	23	0	23	0	56	1
	26	48	64	116	36	69	22	1	80	70	80	70	19	0
	77	186	43	7	114	90	41	5	15	1	15	1	43	4
	19	70	36	10	25	18	92	13	61	48	61	48	26	0
	59	95	27	95	32	10	75	9	78	52	78	52	88	14
	39	141	31	47	21	11	24	0	21	3	21	3	63	18
	46	72	28	47	43	46	29	0	57	9	57	9	49	26
	43	61	48	95	18	4	66	119	59	11	59	11	31	1
	71	148	19	17	80	59	33	0	27	1	27	1	87	0
	45	98	23	27	67	52	35	36	28	0	28	0	25	1
	23	153	23	3	31	40	30	3	86	9	86	9	39	11
	23	91	59	52	30	49	64	15	58	18	58	18	27	1
	68	143	31	4	52	23	27	7	50	7	50	7	62	11
	40	77	19	76	34	16	91	22	70	3	70	3	61	18
	49	182	29	94	32	6	108	58	22	3	22	3	26	1
	65	38	23	74	21	3	70	38	61	18	61	18	77	41
	48	122	22	7	60	76	34	1	37	1	37	1	21	0
	53	75	52	26	62	39	80	62	28	1	28	1	29	6
	26	101	33	26	72	31	33	0	96	21	96	21	40	1
	29	36	73	53	57	11	27	2	45	9	45	9	19	0
	41	65	22	1	49	41	53	16	79	35	79	35	16	1
	52	139	26	78	38	0	82	29	75	1	75	1	63	82
	56	111	32	8	51	3	75	9	19	1	19	1	24	1
	59	105	38	98	26	63	70	4	99	3	99	3	17	0
	58	80	64	138	35	0	75	24	60	6	60	6	23	0
	46	47	22	10	63	33	35	37	27	0	27	0	22	6
	30	58	21	50	22	1	25	4	94	35	94	35	49	0
	25	33	63	52	49	32	38	0	45	11	45	11	15	1
	73	139	58	74	71	61	47	10	54	82	54	82	54	1
	34	77	43	77	79	35	62	55	84	18	84	18	78	7
	24	16	29	41	18	5	30	0	89	21	89	21	20	0
	45	104	48	52	36	77	48	6	18	1	18	1	25	3
	73	75	46	62	48	106	33	1	53	9	53	9	28	0
	54	136	40	23	43	11	32	78	52	1	52	1	30	0
	82	148	40	35	54	90	58	13	99	45	99	45	72	6
	48	129	52	100	53	57	40	42	38	0	38	0	15	0
	26	27	68	25	62	17	74	7	19	1	19	1	22	1
	23	26	27	41	73	61	55	13	49	1	49	1	62	0
	45	81	52	23	46	69	38	17	24	9	24	9	21	0
	55	114	57	87	58	46	27	1	34	0	34	0	68	26
	35	88	34	100	27	51	60	8	41	1	41	1	45	9
	27	21	26	4	53	41	33	19	30	3	30	3	65	11
	37	75	39	27	50	71	23	0	18	4	18	4	53	11
	66	58	66	77	31	16	38	34	23	0	23	0	19	0
	29	75	29	41	46	27	55	10	22	7	22	7	64	41
	59	62	37	16	52	33	31	7	23	4	23	4	28	0
	69	111	33	13	61	67	65	13	24	4	24	4	86	18
	26	50	55	99	27	21	46	9	66	11	66	11	22	9
	70	151	62	63	19	5	52	7	26	3	26	3	25	0
	33	87	37	16	47	39	69	28	59	1	59	1	29	1
	59	82	47	43	52	84	46	113	69	7	69	7	60	16
	53	28	19	41	60	15	81	70	60	29	60	29	87	38
	97	183	35	159	47	5	35	23	54	4	54	4	25	1
	59	109	33	15	79	77	29	7	36	14	36	14	18	0
	32	94	84	52	31	31	88	25	39	66	39	66	39	14
	51	71	52	29	19	17	97	92	36	16	36	16	29	1
	43	54	34	79	59	81	84	51	51	4	51	4	34	1
	79	132	30	8	26	48	66	35	70	11	70	11	76	6
	50	94	75	50	43	38	25	2	34	0	34	0	78	1
	41	101	42	2	59	42	24	3	19	1	19	1	30	0
	33	98	15	15	61	68	83	9	83	35	83	35	36	3
	74	55	35	84	71	57	41	93	72	18	72	18	50	1
	54	62	28	10	37	3	31	4	61	14	61	14	31	3
	23	65	103	109	35	41	27	1	45	6	45	6	74	35
	23	111	22	19	48	4	78	22	32	1	32	1	39	0
	42	109	25	45	23	10	64	45	49	4	49	4	20	0
	63	84	27	22	44	18	51	27	40	0	40	0	73	3
	57	61	23	1	37	34	37	4	23	1	23	1	42	14
	77	102	42	29	20	25	42	0	74	3	74	3	28	14
	45	114	53	25	74	29	62	32	31	0	31	0	49	1
	63	108	81	111	37	34	86	93	33	1	33	1	58	1
	32	26	59	33	64	77	29	23	38	55	38	55	61	1
	65	116	32	2	22	8	37	8	69	6	69	6	53	7
	67	109	67	50	80	82	27	3	53	16	53	16	16	1
	67	149	15	3	35	17	47	5	70	29	70	29	47	7
	19	78	64	97	54	26	78	23	64	23	64	23	79	6
	77	162	25	28	22	15	50	26	59	16	59	16	45	1
	37	6	35	29	25	1	33	0	76	18	76	18	24	0
	44	62	32	38	80	79	22	9	78	18	78	18	20	1
	41	121	68	128	30	25	29	28	25	108	25	108	52	1
	24	57	44	38	55	23	78	43	41	18	41	18	29	4
	57	78	30	7	30	27	25	0	77	55	77	55	35	11
	44	82	81	46	45	112	55	25	82	14	82	14	21	0
	37	108	69	84	32	26	74	42	57	1	57	1	34	0
	46	155	61	38	75	31	50	18	84	21	84	21	67	3
	82	162	19	11	37	98	50	44	80	63	80	63	29	0
	29	28	24	17	46	49	22	0	38	11	38	11	72	1
	36	67	43	33	68	72	67	11	26	1	26	1	74	0
	75	152	64	54	43	39	25	0	50	14	50	14	23	0
	49	58	25	66	55	58	62	77	69	1	69	1	51	1
	60	74	20	4	27	1	22	16	24	6	24	6	55	7
	23	129	54	29	80	42	42	16	40	0	40	0	42	21
	18	136	22	13	44	18	78	21	46	6	46	6	98	0
	62	85	54	103	49	43	37	39	106	29	106	29	36	1
	46	107	44	110	67	16	42	7	34	1	34	1	69	41
	42	159	27	34	40	26	23	0	91	151	91	151	74	7
	58	102	91	94	42	14	47	9	75	4	75	4	21	1
	37	75	19	6	21	11	36	1	23	0	23	0	21	0
	56	134	77	114	21	43	30	173	46	7	46	7	45	4
	56	128	50	119	27	21	104	8	42	7	42	7	23	0
	73	159	23	117	66	38	46	15	79	29	79	29	84	6
	63	132	32	3	40	25	33	11	41	3	41	3	48	38
	69	111	37	5	55	64	32	19	91	48	91	48	61	38
	46	112	75	50	29	10	57	48	42	1	42	1	15	0
	18	45	73	5	61	25	49	48	46	26	46	26	46	0
	23	33	20	19	25	15	60	10	66	18	66	18	55	52
	91	196	29	23	73	44	41	9	16	3	16	3	61	18
	52	74	43	63	45	36	76	63	36	9	36	9	18	0
	32	30	35	24	28	9	35	10	57	16	57	16	22	0
	56	112	37	53	20	13	53	11	47	4	47	4	60	26
	60	145	51	32	20	1	25	14	23	9	23	9	31	1
	71	81	30	4	58	29	28	0	18	4	18	4	28	0
	28	80	51	79	27	1	33	15	96	1	96	1	18	1
	75	61	50	16	26	35	44	10	19	1	19	1	25	0
	53	132	51	33	20	9	49	75	46	1	46	1	20	1
	33	34	54	46	41	6	85	102	35	48	35	48	17	1
	39	51	55	29	55	56	26	11	52	177	52	177	14	0
	58	131	41	38	76	81	42	1	74	4	74	4	78	16
	30	43	57	37	89	26	115	41	39	6	39	6	38	3
	72	122	45	61	56	41	38	5	61	41	61	41	30	9
	49	24	34	38	23	1	78	19	27	1	27	1	24	1
	26	104	31	38	84	78	78	43	65	7	65	7	24	0
	20	36	76	56	58	86	52	29	33	9	33	9	35	35
	57	64	54	7	25	28	74	19	17	1	17	1	71	16
	21	31	49	121	28	2	37	4	27	4	27	4	51	1
	63	126	26	16	21	32	31	1	20	4	20	4	25	3
	78	105	26	6	69	67	31	0	84	18	84	18	40	1
	50	104	43	39	63	26	50	0	23	0	23	0	71	0
	77	158	44	41	86	37	18	1	42	11	42	11	54	7
	28	108	15	18	36	31	44	0	17	1	17	1	44	4
	67	148	25	3	44	88	57	32	65	11	65	11	46	6
	36	28	31	50	29	28	26	10	98	18	98	18	23	7
	28	16	63	73	33	1			49	1	49	1	34	1
	42	108	37	21	56	108			18	3	18	3	65	14
	21	55	27	9	18	2			62	3	62	3	37	1
	25	14	58	33	31	15			48	0	48	0	20	0
	31	95	79	64	21	10			70	6	70	6	85	6
	43	84	60	79	67	66			67	7	67	7	54	3
	48	18	29	2	64	96			32	0	32	0	60	29
	70	136	23	96	44	92			31	0	31	0	71	21
	68	95	26	13	25	17			19	0	19	0	25	11
	66	158	23	202	48	42			38	1	38	1	63	7
	48	112	54	60	32	10			39	4	39	4	70	0
	37	105	23	61	24	0			71	45	71	45	45	1
	70	98	34	26	31	5			59	4	59	4	75	23
	27	53	60	27	79	40			115	59	115	59	33	0
	63	119	25	20	67	35			27	1	27	1	55	16
	30	58	33	45	25	17			40	6	40	6	37	1
	23	75	62	142	53	62			46	11	46	11	55	4
	56	108	74	87	65	46			29	11	29	11	48	1
	16	38	66	7	65	42			30	29	30	29	78	1
	43	71	22	23					22	1	22	1	31	1
	33	53	43	67					49	21	49	21	71	7
	15	23	37	28					53	6	53	6	80	3
	48	36	41	17					37	3	37	3	21	1
	53	67	34	30					48	9	48	9	47	3
	62	116	49	66					48	1	48	1	40	1
	42	109	19	16					68	0	68	0	26	4
	61	118	22	1					26	1	26	1	30	0
	39	139	81	66					27	14	27	14
	52	118	54	71					84	48	84	48
	67	193	59	72					19	0	19	0
	32	92	67	82					43	18	43	18
	55	134	54	13					31	0	31	0
	39	67	56	66					75	3	75	3
	28	28	43	34					43	1	43	1
	41	134	53	52					22	1	22	1
	28	51	15	14					87	48	87	48
	25	3	40	75					79	6	79	6
			46	10					66	1	66	1
			51	17
			24	3
			39	30
			19	2
			73	53
			67	26
			61	32
			31	46
			14	0
			68	23
			28	4
			21	11
			12	6
			67	30
			20	11
