# Supplementary material for: In vivo study of gene expression with an enhanced dual-color fluorescent transcriptional timer
Source: eLife. 2019 May 29;8:e46181. doi: 10.7554/eLife.46181 (PMC6660218; doi:10.7554/eLife.46181)
Supplement: Figure 2—figure supplement 1—source data 2. [file elife-46181-fig2-figsupp1-data2.xlsx]

## Sheet: Sheet1
	Time (h)	Sample 1	Sample 2	Sample 3
	0	52	58.4	54.4
	0.5	49.1	50.7	45.4
	1	47.3	45.1	39.6
	1.5	38.8	31.3	30.7
	2	29	34.8	24.5
	2.5	27.1	30.9	22.2
	3	24	21.7	21.2
	3.5	22.4	23	21
	4	23.8	22.2	21.1
	4.5	22.6	21.8	20.6
