# Supplementary material for: In vivo study of gene expression with an enhanced dual-color fluorescent transcriptional timer
Source: eLife. 2019 May 29;8:e46181. doi: 10.7554/eLife.46181 (PMC6660218; doi:10.7554/eLife.46181)
Supplement: Figure 2—figure supplement 1—source data 3. [file elife-46181-fig2-figsupp1-data3.xlsx]

## Sheet: Sheet1
	Sample 1
	Time (h)	Intensity	Intensity (Fold Change)	log (Fold Change)
	0	52	1	0
	0.5	49.1	0.944231	-0.0249219
	1	47.3	0.909615	-0.0411422
	1.5	38.8	0.746154	-0.127172
	2	29	0.557692	-0.253605
	2.5	27.1	0.521154	-0.283034
	3	24	0.461538	-0.335792
	3.5	22.4	0.430769	-0.365755
	4	23.8	0.457692	-0.339426
	4.5	22.6	0.434615	-0.361895
	Sample 2
	Time (h)	Intensity	Intensity (Fold Change)	log (Fold Change)
	0	58.4	1	0
	0.5	50.7	0.868151	-0.0614049
	1	45.1	0.77226	-0.112236
	1.5	31.3	0.535959	-0.270869
	2	34.8	0.59589	-0.224834
	2.5	30.9	0.52911	-0.276454
	3	21.7	0.371575	-0.429953
	3.5	23	0.393836	-0.404685
	4	22.2	0.380137	-0.42006
	4.5	21.8	0.373288	-0.427956
	Sample 3
	Time (h)	Intensity	Intensity (Fold Change)	log (Fold Change)
	0	54.4	1	0
	0.5	45.4	0.834559	-0.078543
	1	39.6	0.727941	-0.137904
	1.5	30.7	0.564338	-0.248461
	2	24.5	0.450368	-0.346433
	2.5	22.2	0.408088	-0.389246
	3	21.2	0.389706	-0.409263
	3.5	21	0.386029	-0.41338
	4	21.1	0.387868	-0.411316
	4.5	20.6	0.378676	-0.421732
