# Supplementary material for: In vivo study of gene expression with an enhanced dual-color fluorescent transcriptional timer
Source: eLife. 2019 May 29;8:e46181. doi: 10.7554/eLife.46181 (PMC6660218; doi:10.7554/eLife.46181)
Supplement: Figure 2—source data 1. [file elife-46181-fig2-data1.xlsx]

## Sheet: Sheet1
	Time (min)	Time (h)	dGFP1	dGFP2	dGFP3	dGFP4	dGFP5	dGFP6	RFP1	RFP2	RFP3	RFP4	RFP5	RFP6
	0	0	220.3	229.2	286.8	256.3	340.1	292	876.6	842.5	957.5	932.4	883.2	841.1
	5	0.0833333	192.2	189.1	230.8	262.1	352.3	249.8	839.3	842.6	905.9	930.5	879.3	838
	10	0.166667	193.6	171.4	229	247	224	264.6	842.3	849.7	966.9	925.1	786.6	752
	15	0.25	195.3	179.4	204.7	206.1	246.5	232	811.3	847.2	957.7	888.3	854.4	817.2
	20	0.333333	169	150.5	174.8	214.9	159.2	242.3	806.2	785.1	928.5	863.3	834.7	800.3
	25	0.416667	176.7	151.9	181.6	186.4	271.3	163.9	816.2	842.3	891.1	886	813.2	756.7
	30	0.5	175.7	148.7	180.7	183.6	196.4	185.8	847.2	843.2	904.9	871.2	801.4	763.1
	35	0.583333	173.1	143.8	164.3	173.5	193.3	202.1	828.9	844.8	901.8	858.9	794.2	748.5
	40	0.666667	168.6	135.3	140.4	156.2	190	214.8	827.1	842.5	852.6	848.5	768.4	739.1
	45	0.75	145	139.1	171.2	165.1	158.4	185.6	780.8	831.2	871.5	837.5	765.7	734.1
	50	0.833333	146.5	149.8	161.7	167.2	146.8	174.6	779.2	808	889	823.3	768	730.9
	55	0.916667	140.8	153.9	148.1	164.5	128.7	160	752.8	790.6	897	805.5	774.2	726.2
	60	1	138	111.3	143.3	147.4	165.1	157.5	781.9	775.5	889.4	786.3	783.4	717.7
	65	1.08333	138.2	114.3	143.7	157.8	130.6	159.2	791	770.7	870.2	769.7	794.9	706.1
	70	1.16667	132.8	110	123.7	137	148.5	158.9	806	756.2	846.6	760.2	807.7	694.3
	75	1.25	122.1	105.8	123.4	135.1	158.2	142.6	763.4	750.5	827.6	760	820	686.5
	80	1.33333	111.4	101.6	123.1	133.2	168	126.4	779.3	748.8	816.9	768.6	829.6	685.3
	85	1.41667	115.4	108.4	106	113.6	134.8	141.7	763.3	764.5	811	783	834.6	690.4
	90	1.5	107.1	100.4	96.6	132.2	129.7	111.1	789.1	773.8	803.9	799	834	698.4
	95	1.58333	113.9	101.2	135	143.2	117.3	129.1	765.8	769	792.3	812.9	827.6	705.2
	100	1.66667	99.8	87.6	108	129.8	102.7	119.9	791.2	741.6	782.2	822.4	816.2	708.1
	105	1.75	100	93.2	105.9	127.9	138	120.8	784.1	707.7	782.3	826.4	801.4	707.4
	110	1.83333	97.9	92.1	103.6	117.9	167.4	113.8	795.9	684.4	767.6	824.8	784.9	705.4
	115	1.91667	107.1	95	110.1	111	138.9	115.4	781.4	681.3	755.6	818.4	768.2	719.8
	120	2	109.4	96.2	114.7	102.5	103.4	112.1	770	692.3	743.7	808.2	752.4	734.5
	125	2.08333	112.5	96.3	107.3	108.1	120.5	116.5	799.2	718.5	749.6	796.9	738.3	715.4
	130	2.16667	90.2	90	94	101.3	122.3	81.6	801.5	732.8	751.4	787.8	726.3	706
	135	2.25	99.9	82.6	102.7	113.1	115.9	97.7	786.9	756	777.6	766.7	716.6	689.8
	140	2.33333	98.6	68.9	100.7	114.7	106.4	96.8	771.7	765.7	816.2	790.4	709.2	655.2
	145	2.41667	94.1	65.3	100.2	94.4	102.6	103.7	775.3	752.8	829.1	805.4	703.7	640.5
	150	2.5	93.9	68.3	97.8	98	109.7	104.1	769.7	723	850.8	826.8	700.2	637.3
	155	2.58333	87.3	69.8	88.4	98	114	96.8	756.8	693.9	823.9	849.5	699.1	649.1
	160	2.66667	82.1	69.8	90.5	94.1	117.5	95.6	745.8	674.1	810.1	868.4	701.5	673.2
	165	2.75	75.6	65.8	90.4	85.7	114	92.3	729.7	660.2	816.5	835.3	708.1	664
	170	2.83333	73.4	81.3	78.1	91.3	112.1	113.5	722.9	652.4	831.1	812.8	718.5	652.9
	175	2.91667	81.9	75.8	85.6	86.9	81.4	99.1	686.8	678.2	864.6	818.5	705.1	666.4
	180	3	82.5	91.3	93.4	103.4	109	97.1	697.1	701.9	852.6	722.8	673.8	675.8
	185	3.08333	68.7	69.8	81.6	85.5	120.7	103.5	703.6	717.6	865.5	719.5	668.7	673.7
	190	3.16667	71.9	75.4	91.1	92.9	104.3	105.1	712.1	718.4	874.9	727.9	665.7	667.6
	195	3.25	73.3	75.3	93.5	96.6	82.5	100.2	701.5	730.5	883.3	716.2	665.3	653.3
	200	3.33333	75.6	61.6	81.8	80.6	107.5	87.3	697.3	751.7	880.5	705.6	667.4	649.9
	205	3.41667	74.2	72.9	85.5	94.7	122.6	111.1	714.9	760	871.4	716.2	671.7	660.1
	210	3.5	73.9	72	75.7	86.1	113.2	103.4	726.5	777.6	849.9	723.8	677.4	670.2
	215	3.58333	78.8	71.1	83.8	90.9	111.7	109.6	731.6	783.7	868.4	745.4	683.6	693.7
	220	3.66667	79.2	67.8	87.7	93	104.9	108.6	733.3	790.3	847.7	727.8	689.1	682.6
	225	3.75	65.6	68.6	87.8	81.9	94.7	92.7	721.7	795.6	860.1	744.5	693.1	683.6
	230	3.83333	66.7	64	84.2	76.4	96.7	83.2	743.9	787.2	888.7	756.3	716.4	690.1
	235	3.91667	70.7	68.2	81	72.7	95.4	79.4	721.5	775.4	872.9	768.6	705.1	684.2
	240	4	66.7	66.6	85.3	79.1	89.4	73	720.9	766.6	883.6	768.1	697.2	679.3
