# Supplementary material for: In vivo study of gene expression with an enhanced dual-color fluorescent transcriptional timer
Source: eLife. 2019 May 29;8:e46181. doi: 10.7554/eLife.46181 (PMC6660218; doi:10.7554/eLife.46181)
Supplement: Figure 2—source data 2. [file elife-46181-fig2-data2.xlsx]

## Sheet: Sheet1
				Normalized
		edGFP	eGFP	edGFP	eGFP
	sample 1	308941	15381	12.02	0.6
	sample 2	355171	12594	13.82	0.49
	sample 3	301264	34334	11.72	1.34
	sample 4	260611	5650	10.14	0.22
	sample 5	329153	29876	12.81	1.16
	sample 6	295826	32224	11.51	1.25
	sample 7	309626	41891	12.05	1.63
	sample 8	300763	22995	11.7	0.89
	sample 9	272794	22741	10.61	0.88
	sample 10	313756	39351	12.21	1.53
