# Supplementary material for: In vivo study of gene expression with an enhanced dual-color fluorescent transcriptional timer
Source: eLife. 2019 May 29;8:e46181. doi: 10.7554/eLife.46181 (PMC6660218; doi:10.7554/eLife.46181)
Supplement: Figure 3—figure supplement 1—source data 1. [file elife-46181-fig3-figsupp1-data1.xlsx]

## Sheet: Sheet1
	Time (min)	Time (h)	GFP1	GFP2	GFP3	RFP1	RFP2	RFP3
	0	0	0.03	0.006	0	0.017	0.002	0
	10	0.17	0.05	0.005	0	0.027	0.003	0
	20	0.33	0.05	0.004	0	0.052	0.005	0
	30	0.5	0.06	0.005	0	0.072	0.007	0
	40	0.67	0.08	0.007	0	0.1	0.01	0
	50	0.83	0.118	0.009	0	0.125	0.014	0
	60	1	0.177	0.011	0	0.154	0.017	0
	70	1.17	0.32	0.012	0	0.176	0.019	0
	80	1.33	0.47	0.014	0	0.195	0.022	0
	90	1.5	0.618	0.017	0	0.21	0.026	0
	100	1.67	0.702	0.019	0	0.231	0.03	0
	110	1.83	0.796	0.021	0	0.249	0.031	0
	120	2	0.861	0.022	0	0.269	0.032	0
	130	2.17	0.93	0.025	0	0.284	0.033	0
	140	2.33	0.959	0.032	0	0.294	0.038	0
	150	2.5	0.988	0.041	0	0.307	0.043	0
	160	2.67	0.973	0.055	0	0.318	0.052	0
	170	2.83	0.999	0.068	0	0.336	0.06	0
	180	3	1.031	0.085	0	0.349	0.075	0
	190	3.17	1.02	0.101	0	0.372	0.088	0
	200	3.33	1.04	0.121	0	0.396	0.105	0
	210	3.5	1.03	0.14	0	0.423	0.12	0
	220	3.67	0.997	0.162	0	0.45	0.138	0
	230	3.83	0.989	0.185	0	0.484	0.155	0
	240	4	0.965	0.205	0	0.511	0.17	0
	250	4.17	0.967	0.228	0	0.528	0.182	0
	260	4.33	0.946	0.252	0	0.537	0.194	0
	270	4.5	0.922	0.281	0	0.554	0.204	0
	280	4.67	0.871	0.309	0	0.57	0.216	0
	290	4.83	0.836	0.335	0.022	0.584	0.225	0
	300	5	0.792	0.359	0.046	0.594	0.238	0
	310	5.17	0.781	0.376	0.073	0.607	0.241	0
	320	5.33	0.76	0.389	0.083	0.62	0.241	0
	330	5.5	0.734	0.394	0.097	0.634	0.232	0
	340	5.67	0.684	0.401	0.112	0.649	0.232	0
	350	5.83	0.64	0.413	0.128	0.671	0.227	0
	360	6	0.591	0.432	0.146	0.705	0.232	0
	370	6.17	0.557	0.462	0.166	0.736	0.236	0
	380	6.33	0.524	0.497	0.193	0.769	0.249	0
	390	6.5	0.489	0.536	0.225	0.791	0.266	0
	400	6.67	0.452	0.564	0.272	0.81	0.285	0
	410	6.83	0.406	0.589	0.315	0.825	0.306	0
	420	7	0.367	0.62	0.366	0.844	0.324	0.013
	430	7.17	0.324	0.658	0.41	0.86	0.34	0.018
	440	7.33	0.289	0.721	0.457	0.868	0.374	0.031
	450	7.5	0.262	0.779	0.504	0.88	0.407	0.035
	460	7.67	0.243	0.836	0.544	0.899	0.449	0.048
	470	7.83	0.219	0.886	0.588	0.922	0.491	0.056
	480	8	0.192	0.921	0.631	0.926	0.524	0.081
	490	8.17	0.14	0.958	0.677	0.924	0.562	0.088
	500	8.33	0.104	0.977	0.714	0.915	0.59	0.107
	510	8.5	0.074	0.981	0.736	0.91	0.612	0.11
	520	8.67	0.06	0.979	0.765	0.912	0.626	0.127
	530	8.83	0.038	0.956	0.799	0.952	0.619	0.135
	540	9	0.021	0.963	0.84	0.945	0.658	0.156
	550	9.17	0.013	0.956	0.872	0.942	0.694	0.163
	560	9.33	0.011	0.949	0.891	0.942	0.738	0.184
	570	9.5	0.008	0.915	0.921	0.931	0.752	0.195
	580	9.67	0.006	0.874	0.935	0.937	0.762	0.227
	590	9.83	0.006	0.844	0.949	0.943	0.783	0.234
	600	10	0.006	0.811	0.947	0.954	0.797	0.259
	610	10.17	0.006	0.778	0.944	0.947	0.814	0.266
	620	10.33	0.007	0.733	0.942	0.934	0.823	0.29
	630	10.5	0.007	0.695	0.927	0.928	0.832	0.299
	640	10.67	0.007	0.664	0.912	0.914	0.846	0.314
	650	10.83	0.007	0.64	0.907	0.903	0.866	0.322
	660	11	0.006	0.609	0.903	0.876	0.881	0.34
	670	11.17	0.005	0.592	0.884	0.871	0.892	0.336
	680	11.33	0.005	0.56	0.847	0.871	0.894	0.332
	690	11.5	0.006	0.525	0.848	0.876	0.901	0.356
	700	11.67	0.005	0.479	0.901	0.874	0.917	0.426
	710	11.83	0.003	0.457	0.904	0.868	0.949	0.429
	720	12	0	0.436	0.878	0.873	0.97	0.448
	730	12.17	0	0.411	0.843	0.871	0.978	0.477
	740	12.33	0	0.373	0.856	0.868	0.964	0.533
	750	12.5	0	0.344	0.864	0.857	0.96	0.54
	760	12.67	0	0.318	0.836	0.859	0.962	0.553
	770	12.83	0	0.294	0.831	0.853	0.984	0.565
	780	13	0	0.239	0.848	0.853	0.976	0.635
	790	13.17	0	0.213	0.85	0.851	0.976	0.632
	800	13.33	0	0.21	0.827	0.85	0.964	0.622
	810	13.5	0	0.226	0.763	0.84	0.952	0.603
	820	13.67	0	0.207	0.733	0.826	0.949	0.673
	830	13.83	0	0.161	0.708	0.813	0.942	0.724
	840	14	0	0.145	0.721	0.816	0.933	0.805
	850	14.17	0	0.138	0.66	0.81	0.915	0.791
	860	14.33	0	0.132	0.613	0.805	0.887	0.755
	870	14.5	0	0.143	0.57	0.783	0.873	0.807
	880	14.67	0	0.145	0.565	0.777	0.861	0.891
	890	14.83	0	0.145	0.556	0.773	0.863	0.883
	900	15	0	0.123	0.491	0.766	0.862	0.824
	910	15.17	0		0.454	0.755	0.853	0.841
	920	15.33	0		0.407	0.747	0.859	0.907
	930	15.5	0		0.41	0.75	0.847	0.938
	940	15.67	0		0.372		0.859	0.986
	950	15.83	0		0.335		0.846	0.961
	960	16	0		0.33		0.855	0.893
	970	16.17	0		0.374		0.841	0.932
