# Supplementary material for: In vivo study of gene expression with an enhanced dual-color fluorescent transcriptional timer
Source: eLife. 2019 May 29;8:e46181. doi: 10.7554/eLife.46181 (PMC6660218; doi:10.7554/eLife.46181)
Supplement: Figure 3—figure supplement 1—source data 2. [file elife-46181-fig3-figsupp1-data2.xlsx]

## Sheet: Sheet1
	Time (h)	GFP log(Fold Change)		Time (h)	RFP log(Fold Change)
	0	-0.00417603		0	-0.00688623
	0.17	-0.0133263		0.17	-0.00955096
	0.33	-0.0192273		0.33	-0.00955096
	0.5	-0.0229553		0.5	-0.0152087
	0.67	-0.0156745		0.67	-0.0156359
	0.83	-0.0146988		0.83	-0.0225093
	1	-0.0241261		1	-0.0176908
	1.17	-0.0354507		1.17	-0.0204882
	1.33	-0.0598285		1.33	-0.0243591
	1.5	-0.0777784		1.5	-0.0350851
	1.67	-0.101034		1.67	-0.0456787
	1.83	-0.107248		1.83	-0.0411719
	2	-0.119165		2	-0.0429626
	2.17	-0.134211		2.17	-0.0393659
	2.33	-0.164876		2.33	-0.0377656
	2.5	-0.19366		2.5	-0.0397242
	2.67	-0.228207		2.67	-0.0362899
	2.83	-0.254339		2.83	-0.0463292
	3	-0.280729		3	-0.0493945
	3.17	-0.310909		3.17	-0.054189
	3.33	-0.344892		3.33	-0.0573565
	3.5	-0.391442		3.5	-0.0637259
	3.67	-0.435428		3.67	-0.0678578
	3.83	-0.489633		3.83	-0.065312
	4	-0.538433		4	-0.0582456
	4.17	-0.581831		4.17	-0.0552682
	4.33	-0.614039		4.33	-0.0547932
	4.5	-0.658682		4.5	-0.0610312
	4.67	-0.717424		4.67	-0.0659271
	4.83	-0.854371		4.83	-0.0743708
	5	-0.981567		5	-0.0786672
	5.17	-1.13319		5.17	-0.0841165
	5.33	-1.2211		5.33	-0.0866667
	5.5	-1.41647		5.5	-0.0873911
	5.67	-1.67044		5.67	-0.0939626
	5.83	-1.89295		5.83	-0.0994429
	6	-1.96248		6	-0.0988375
	6.17	-2.08218		0	-0.00691692
	6.33	-2.20946		0.17	-0.0097659
	6.5	-2.21172		0.33	-0.0097659
	6.67	-2.19014		0.5	-0.00678007
	6.83	-2.19073		0.67	-0.00767192
	7	-2.18238		0.83	-0.00579871
	7.17	-2.1758		1	-0.00980665
	7.33	-2.14376		1.17	-0.00921295
	7.5	-2.15077		1.33	-0.0185919
	7.67	-2.18838		1.5	-0.0268288
	7.83	-2.31928		1.67	-0.0315419
	8	-2.29793		1.83	-0.0280742
	8.17	-2.23573		2	-0.0267964
	8.33	-2.27771		2.17	-0.0335488
	8.5	-2.55248		2.33	-0.0327166
	0	-0.00824526		2.5	-0.0349391
	0.17	-0.00919774		2.67	-0.0365929
	0.33	-0.0196107		2.83	-0.0422837
	0.5	-0.0163236		3	-0.0492095
	0.67	-0.0194329		3.17	-0.0483712
	0.83	-0.0225374		3.33	-0.0513016
	1	-0.0387843		3.5	-0.0461911
	1.17	-0.0585552		3.67	-0.053954
	1.33	-0.0735146		3.83	-0.0615104
	1.5	-0.0912458		4	-0.0733391
	1.67	-0.109129		4.17	-0.072707
	1.83	-0.134903		4.33	-0.0695297
	2	-0.157706		4.5	-0.0685481
	2.17	-0.177556		4.67	-0.0688548
	2.33	-0.193952		4.83	-0.0767473
	2.5	-0.21553		5	-0.0761575
	2.67	-0.227757		5.17	-0.0784976
	2.83	-0.251471		5.33	-0.0730082
	3	-0.279438		5.5	-0.0783803
	3.17	-0.319376		5.67	-0.087345
	3.33	-0.33988		5.83	-0.0978657
	3.5	-0.360145		6	-0.102366
	3.67	-0.386135		6.17	-0.10156
	3.83	-0.427992		6.33	-0.101871
	4	-0.463467		6.5	-0.106578
	4.17	-0.49774		6.67	-0.112712
	4.33	-0.531053		6.83	-0.114516
	4.5	-0.620785		7	-0.117513
	4.67	-0.672103		7.17	-0.120823
	4.83	-0.678815		7.33	-0.124277
	5	-0.645949		0	-0.00313006
	5.17	-0.684086		0.17	-0.00531173
	5.33	-0.794291		0.33	-0.00531173
	5.5	-0.837606		0.5	-0.00455082
	5.67	-0.859136		0.67	-0.00835023
	5.83	-0.88102		0.83	-0.00856902
	6	-0.845622		1	-0.00981784
	6.17	-0.838473		1.17	-0.00870968
	6.33	-0.839362		1.33	-0.0123808
	6.5	-0.909866		1.5	-0.0167291
	6.67	-0.939302		1.67	-0.0192031
	0	-0.045061		1.83	-0.0160757
	0.17	-0.0437316		2	-0.0117517
	0.33	-0.0564791		2.17	-0.0177123
	0.5	-0.0740806		2.33	-0.0209383
	0.67	-0.0675132		2.5	-0.0252796
	0.83	-0.0637258		2.67	-0.0238156
	1	-0.0779117		2.83	-0.0236066
	1.17	-0.0803667		3	-0.0287815
	1.33	-0.0717836		3.17	-0.0299346
	1.5	-0.0704624		3.33	-0.0383014
	1.67	-0.0827256		3.5	-0.0396444
	1.83	-0.117611		3.67	-0.0476467
	2	-0.135089		3.83	-0.0481592
	2.17	-0.149802		4	-0.0586785
	2.33	-0.142036		4.17	-0.0639617
	2.5	-0.180517		4.33	-0.0704475
	2.67	-0.21266		4.5	-0.0742828
	2.83	-0.244045		4.67	-0.0788115
	3	-0.247696		4.83	-0.0816508
	3.17	-0.254886		5	-0.0842359
	3.33	-0.308751		5.17	-0.0834638
	3.5	-0.342674		5.33	-0.0877416
	3.67	-0.390171		5.5	-0.0923806
	3.83	-0.386809		5.67	-0.0956626
	4	-0.429022		5.83	-0.0999448
	4.17	-0.474579		6	-0.0982505
	4.33	-0.481792		6.17	-0.104789
	4.5	-0.427424		6.33	-0.104809
	4.67	-0.490055		6.5	-0.109922
	0	0.000498576		6.67	-0.113414
	0.17	-0.001981		0	0.00112281
	0.33	0.000491871		0.17	0.000168608
	0.5	-0.0127776		0.33	0.000168608
	0.67	-0.019178		0.5	1.15625e-05
	0.83	-0.022348		0.67	-0.00133084
	1	-0.029673		0.83	-0.000167626
	1.17	-0.0352707		1	0.00346389
	1.33	-0.053516		1.17	0.00691348
	1.5	-0.0706621		1.33	0.00552395
	1.67	-0.0978466		1.5	-0.00494227
	1.83	-0.125197		1.67	-0.0135196
	2	-0.135974		1.83	-0.016174
	2.17	-0.146744		2	-0.012002
	2.33	-0.162438		2.17	-0.0130844
	2.5	-0.19687		2.33	-0.0187127
	2.67	-0.228014		2.5	-0.0234747
	2.83	-0.24755		2.67	-0.0286207
	3	-0.280793		2.83	-0.0348337
	3.17	-0.303189		3	-0.0458456
	3.33	-0.365934		3.17	-0.0506558
	3.5	-0.386808		3.33	-0.0487991
	3.67	-0.428478		3.5	-0.0465317
	3.83	-0.441197		3.67	-0.0523908
	4	-0.507759		3.83	-0.0607067
	4.17	-0.566557		4	-0.0711623
	4.33	-0.653138		4.17	-0.0715183
	4.5	-0.657143		4.33	-0.0771888
	4.67	-0.754969		4.5	-0.0754402
	4.83	-0.806787		4.67	-0.0787997
	5	-0.960225		4.83	-0.0845999
	5.17	-1.08006		5	-0.0906875
	5.33	-1.22521		5.17	-0.100573
	5.5	-1.33543		5.33	-0.106157
	5.67	-1.36032		5.5	-0.106879
	5.83	-1.43502		5.67	-0.107253
	6	-1.75059		5.83	-0.104297
	0	-0.0315171		6	-0.114097
	0.17	-0.0457575		6.17	-0.115967
	0.33	-0.0660008		6.33	-0.12368
	0.5	-0.0625889		6.5	-0.121442
	0.67	-0.0532689		6.67	-0.130211
	0.83	-0.069721		6.83	-0.128945
	1	-0.0595948		7	-0.130519
	1.17	-0.0552524		7.17	-0.126393
	1.33	-0.0435548		7.33	-0.12008
	1.5	-0.0521087		7.5	-0.124103
	1.67	-0.0792516		7.67	-0.116763
	1.83	-0.0877701		0	0.00121953
	2	-0.102858		0.17	0.00346715
	2.17	-0.121081		0.33	0.00346715
	2.33	-0.14098		0.5	0.00567447
	2.5	-0.149137		0.67	0.00474693
	2.67	-0.136167		0.83	-0.00141352
	2.83	-0.142075		1	-0.0094758
	3	-0.173839		1.17	-0.00984434
	3.17	-0.213406		1.33	-0.0109561
	3.33	-0.23537		1.5	-0.0164285
	3.5	-0.251914		1.67	-0.0164712
	3.67	-0.29108		1.83	-0.0149068
	3.83	-0.309576		2	-0.0118714
	4	-0.375248		2.17	-0.0181224
	4.17	-0.401605		2.33	-0.0264159
	4.33	-0.459385		2.5	-0.0311259
	4.5	-0.500217		2.67	-0.0369834
	4.67	-0.551346		2.83	-0.0372679
	4.83	-0.661859		3	-0.0459584
	5	-0.762978		3.17	-0.0463813
	5.17	-0.866125		3.33	-0.0538379
	5.33	-1.01424		3.5	-0.0518739
	5.5	-1.22859		3.67	-0.0633073
	5.67	-1.3302		3.83	-0.070179
	5.83	-1.19897		4	-0.0841399
	6	-0.997806		4.17	-0.0815774
	6.17	-1.16239		4.33	-0.0811598
	0	0.00766641		4.5	-0.077441
	0.17	0.0124323		4.67	-0.0781992
	0.33	0.0097636		4.83	-0.0823764
	0.5	0.0110339		5	-0.085195
	0.67	0.00760411		5.17	-0.0887214
	0.83	-0.0184362		5.33	-0.0859619
	1	-0.0331789		5.5	-0.0903465
	1.17	-0.0739764		5.67	-0.0941958
	1.33	-0.0695493		5.83	-0.104233
	1.5	-0.0819668		6	-0.108107
	1.67	-0.0970384		6.17	-0.113895
	1.83	-0.125671		6.33	-0.119195
	2	-0.173414		6.5	-0.12079
	2.17	-0.176433		6.67	-0.123077
	2.33	-0.200999		6.83	-0.127287
	2.5	-0.204296		7	-0.130107
	2.67	-0.236115		7.17	-0.135943
	2.83	-0.268723		7.33	-0.129283
	3	-0.273598
	3.17	-0.281266
	3.33	-0.304852
	3.5	-0.340972
	3.67	-0.417023
	3.83	-0.455831
	4	-0.468818
	4.17	-0.436254
	4.33	-0.427583
	4.5	-0.524114
	4.67	-0.628866
	4.83	-0.72274
	5	-0.73336
	5.17	-0.727715
	5.33	-0.830048
	5.5	-0.900625
	5.67	-0.864721
