# Supplementary material for: In vivo study of gene expression with an enhanced dual-color fluorescent transcriptional timer
Source: eLife. 2019 May 29;8:e46181. doi: 10.7554/eLife.46181 (PMC6660218; doi:10.7554/eLife.46181)
Supplement: Figure 3—source data 1. [file elife-46181-fig3-data1.xlsx]

## Sheet: Sheet1
	Time (h)	Simulated Promoter	Simulated dGFP	Simulated RFP		Time (h)	dGFP (Normalized)	RFP (Normalized)
	0	0.800071	0	0		0	0.029	0.019
	0.01	0.805504	0	0		0.17	0.048	0.019
	0.02	0.810863	0	0		0.33	0.047	0.019
	0.03	0.816146	0	0		0.5	0.057	0.03
	0.04	0.821355	1.5464e-05	3.16499e-07		0.67	0.076	0.058
	0.05	0.82649	6.19587e-05	1.2681e-06		0.83	0.112	0.082
	0.06	0.831549	0.000151785	3.16889e-06		1	0.168	0.114
	0.07	0.836533	0.00029397	6.32838e-06		1.17	0.304	0.13
	0.08	0.841442	0.000494864	1.10515e-05		1.33	0.447	0.153
	0.09	0.846276	0.000758752	1.76387e-05		1.5	0.587	0.167
	0.1	0.851035	0.00108836	2.6386e-05		1.67	0.667	0.188
	0.11	0.855718	0.00148525	3.75849e-05		1.83	0.757	0.227
	0.12	0.860326	0.00195013	5.15226e-05		2	0.818	0.252
	0.13	0.864858	0.00248311	6.84818e-05		2.17	0.884	0.261
	0.14	0.869314	0.00308388	8.87411e-05		2.33	0.911	0.272
	0.15	0.873695	0.00375182	0.000112575		2.5	0.939	0.3
	0.16	0.878	0.00448614	0.000140252		2.67	0.924	0.333
	0.17	0.88223	0.00528596	0.00017204		2.83	0.949	0.349
	0.18	0.886384	0.00615031	0.0002082		3	0.98	0.361
	0.19	0.890462	0.00707824	0.000248988		3.17	0.969	0.381
	0.2	0.894464	0.00806879	0.000294659		3.33	0.988	0.396
	0.21	0.89839	0.00912106	0.000345462		3.5	0.978	0.422
	0.22	0.902241	0.0102342	0.000401643		3.67	0.947	0.449
	0.23	0.906016	0.0114073	0.000463442		3.83	0.939	0.48
	0.24	0.909715	0.0126397	0.000531097		4	0.916	0.51
	0.25	0.913339	0.0139307	0.000604841		4.17	0.918	0.55
	0.26	0.916886	0.0152795	0.000684905		4.33	0.899	0.579
	0.27	0.920358	0.0166856	0.000771514		4.5	0.876	0.599
	0.28	0.923755	0.0181485	0.000864891		4.67	0.828	0.61
	0.29	0.927075	0.0196675	0.000965252		4.83	0.794	0.629
	0.3	0.93032	0.0212423	0.00107281		5	0.753	0.647
	0.31	0.93349	0.0228723	0.00118779		5.17	0.742	0.663
	0.32	0.936584	0.0245571	0.00131038		5.33	0.722	0.674
	0.33	0.939603	0.0262964	0.00144079		5.5	0.697	0.689
	0.34	0.942546	0.0280897	0.00157922		5.67	0.65	0.704
	0.35	0.945414	0.0299368	0.00172587		5.83	0.608	0.72
	0.36	0.948207	0.0318372	0.00188094		6	0.562	0.737
	0.37	0.950925	0.0337907	0.0020446		6.17	0.529	0.762
	0.38	0.953568	0.0357969	0.00221705		6.33	0.498	0.8
	0.39	0.956136	0.0378555	0.00239847		6.5	0.464	0.836
	0.4	0.958629	0.0399661	0.00258903		6.67	0.429	0.872
	0.41	0.961048	0.0421286	0.00278892		6.83	0.386	0.898
	0.42	0.963392	0.0443426	0.00299831		7	0.349	0.919
	0.43	0.965662	0.0466077	0.00321736		7.17	0.308	0.936
	0.44	0.967857	0.0489237	0.00344624		7.33	0.275	0.958
	0.45	0.969978	0.0512903	0.00368511		7.5	0.249	0.976
	0.46	0.972025	0.0537071	0.00393414		7.67	0.231	0.985
	0.47	0.973998	0.0561738	0.00419347		7.83	0.208	0.998
	0.48	0.975898	0.0586902	0.00446327		8	0.182	1.021
	0.49	0.977724	0.0612558	0.00474368		8.17	0.133	1.046
	0.5	0.979476	0.0638703	0.00503484		8.33	0.099	1.051
	0.51	0.981155	0.0665335	0.00533691		8.5	0.07	1.048
	0.52	0.982762	0.0692448	0.00565001		8.67	0.057	1.039
	0.53	0.984295	0.0720041	0.0059743		8.83	0.036	1.033
	0.54	0.985755	0.0748108	0.0063099		9	0.02	1.035
	0.55	0.987143	0.0776647	0.00665694		9.17	0.012	1.08
	0.56	0.988458	0.0805654	0.00701556		9.33	0.01	1.072
	0.57	0.989702	0.0835124	0.00738588		9.5	0.008	1.069
	0.58	0.990873	0.0865054	0.00776801		9.67	0.006	1.069
	0.59	0.991972	0.089544	0.00816209		9.83	0.006	1.057
	0.6	0.993	0.0926277	0.00856823		10	0.006	1.063
	0.61	0.993957	0.0957561	0.00898654		10.17	0.006	1.07
	0.62	0.994842	0.0989288	0.00941713		10.33	0.006	1.083
	0.63	0.995657	0.102145	0.00986011		10.5	0.006	1.075
	0.64	0.9964	0.105405	0.0103156		10.67	0.007	1.06
	0.65	0.997074	0.108708	0.0107837		10.83	0.007	1.053
	0.66	0.997676	0.112054	0.0112645		11	0.006	1.037
	0.67	0.998209	0.115441	0.011758		11.17	0.005	1.025
	0.68	0.998673	0.118871	0.0122645		11.33	0.005	0.994
	0.69	0.999066	0.122341	0.012784		11.5	0.006	0.989
	0.7	0.99939	0.125852	0.0133165		11.67	0.005	0.989
	0.71	0.999646	0.129403	0.0138622		11.83	0.003	0.994
	0.72	0.999832	0.132993	0.0144211		12	0	0.991
	0.73	0.99995	0.136623	0.0149934		12.17	0	0.985
	0.74	1	0.140292	0.015579		12.33	0	0.991
	0.75	0.999982	0.143998	0.0161782		12.5	0	0.989
	0.76	0.999896	0.147743	0.0167909		12.67	0	0.985
	0.77	0.999742	0.151524	0.0174172		12.83	0	0.973
	0.78	0.999522	0.155342	0.0180572		13	0	0.975
	0.79	0.999234	0.159196	0.018711		13.17	0	0.969
	0.8	0.99888	0.163085	0.0193786		13.33	0	0.968
	0.81	0.99846	0.16701	0.0200601		13.5	0	0.966
	0.82	0.997974	0.170969	0.0207555		13.67	0	0.965
	0.83	0.997422	0.174962	0.021465		13.83	0	0.954
	0.84	0.996804	0.178988	0.0221885		14	0	0.937
	0.85	0.996122	0.183048	0.0229261		14.17	0	0.923
	0.86	0.995375	0.187139	0.0236779		14.33	0	0.926
	0.87	0.994563	0.191262	0.0244439		14.5	0	0.919
	0.88	0.993687	0.195417	0.0252241		14.67	0	0.914
	0.89	0.992747	0.199602	0.0260187		14.83	0	0.888
	0.9	0.991744	0.203817	0.0268275		15	0	0.882
	0.91	0.990678	0.208062	0.0276508		15.17	0	0.877
	0.92	0.989548	0.212336	0.0284885		15.33	0	0.869
	0.93	0.988356	0.216638	0.0293406		15.5	0	0.856
	0.94	0.987102	0.220968	0.0302072		15.67	0	0.848
	0.95	0.985787	0.225326	0.0310883		15.83	0	0.851
	0.96	0.984409	0.22971	0.0319839		16	0	0.85
	0.97	0.982971	0.23412	0.0328941
	0.98	0.981471	0.238556	0.0338188
	0.99	0.979911	0.243017	0.0347582
	1	0.978291	0.247502	0.0357122
	1.01	0.976611	0.252012	0.0366809
	1.02	0.974872	0.256545	0.0376642
	1.03	0.973074	0.2611	0.0386621
	1.04	0.971217	0.265678	0.0396748
	1.05	0.969301	0.270277	0.0407021
	1.06	0.967328	0.274898	0.0417441
	1.07	0.965297	0.279539	0.0428008
	1.08	0.963209	0.2842	0.0438723
	1.09	0.961064	0.28888	0.0449584
	1.1	0.958863	0.29358	0.0460593
	1.11	0.956605	0.298297	0.0471748
	1.12	0.954292	0.303032	0.048305
	1.13	0.951924	0.307785	0.04945
	1.14	0.9495	0.312554	0.0506096
	1.15	0.947022	0.317339	0.0517838
	1.16	0.94449	0.322139	0.0529728
	1.17	0.941904	0.326955	0.0541764
	1.18	0.939265	0.331784	0.0553946
	1.19	0.936573	0.336628	0.0566274
	1.2	0.933828	0.341485	0.0578748
	1.21	0.931031	0.346354	0.0591368
	1.22	0.928182	0.351236	0.0604134
	1.23	0.925282	0.356129	0.0617044
	1.24	0.922331	0.361033	0.06301
	1.25	0.919329	0.365948	0.06433
	1.26	0.916278	0.370872	0.0656645
	1.27	0.913176	0.375806	0.0670134
	1.28	0.910026	0.380749	0.0683767
	1.29	0.906826	0.385701	0.0697543
	1.3	0.903578	0.39066	0.0711462
	1.31	0.900282	0.395626	0.0725524
	1.32	0.896938	0.400599	0.0739729
	1.33	0.893547	0.405578	0.0754075
	1.34	0.890109	0.410563	0.0768563
	1.35	0.886625	0.415553	0.0783191
	1.36	0.883095	0.420547	0.0797961
	1.37	0.87952	0.425546	0.081287
	1.38	0.875899	0.430548	0.082792
	1.39	0.872234	0.435553	0.0843108
	1.4	0.868524	0.440561	0.0858435
	1.41	0.864771	0.44557	0.08739
	1.42	0.860974	0.450581	0.0889503
	1.43	0.857135	0.455593	0.0905243
	1.44	0.853253	0.460606	0.0921119
	1.45	0.849329	0.465618	0.0937131
	1.46	0.845363	0.47063	0.0953279
	1.47	0.841357	0.475641	0.0969561
	1.48	0.837309	0.48065	0.0985978
	1.49	0.833222	0.485657	0.100253
	1.5	0.829094	0.490662	0.101921
	1.51	0.824927	0.495663	0.103602
	1.52	0.820721	0.500661	0.105297
	1.53	0.816477	0.505655	0.107005
	1.54	0.812195	0.510644	0.108725
	1.55	0.807875	0.515629	0.110459
	1.56	0.803517	0.520608	0.112206
	1.57	0.799124	0.525581	0.113965
	1.58	0.794693	0.530547	0.115737
	1.59	0.790227	0.535507	0.117522
	1.6	0.785726	0.540459	0.119319
	1.61	0.78119	0.545404	0.121128
	1.62	0.776619	0.55034	0.122951
	1.63	0.772015	0.555267	0.124785
	1.64	0.767377	0.560186	0.126632
	1.65	0.762705	0.565094	0.128491
	1.66	0.758001	0.569992	0.130362
	1.67	0.753265	0.57488	0.132244
	1.68	0.748498	0.579757	0.134139
	1.69	0.743698	0.584622	0.136046
	1.7	0.738868	0.589476	0.137964
	1.71	0.734008	0.594317	0.139894
	1.72	0.729118	0.599145	0.141836
	1.73	0.724198	0.60396	0.143789
	1.74	0.71925	0.608761	0.145753
	1.75	0.714272	0.613549	0.147729
	1.76	0.709267	0.618322	0.149716
	1.77	0.704234	0.62308	0.151714
	1.78	0.699174	0.627822	0.153723
	1.79	0.694087	0.632549	0.155743
	1.8	0.688974	0.63726	0.157774
	1.81	0.683835	0.641954	0.159815
	1.82	0.67867	0.646631	0.161867
	1.83	0.673481	0.651291	0.16393
	1.84	0.668267	0.655933	0.166003
	1.85	0.66303	0.660557	0.168086
	1.86	0.657769	0.665162	0.170179
	1.87	0.652484	0.669749	0.172283
	1.88	0.647177	0.674316	0.174397
	1.89	0.641848	0.678863	0.17652
	1.9	0.636497	0.683391	0.178653
	1.91	0.631125	0.687897	0.180796
	1.92	0.625732	0.692383	0.182949
	1.93	0.620319	0.696848	0.185111
	1.94	0.614885	0.701291	0.187282
	1.95	0.609433	0.705713	0.189463
	1.96	0.603961	0.710112	0.191653
	1.97	0.598471	0.714488	0.193851
	1.98	0.592962	0.718841	0.196059
	1.99	0.587436	0.723171	0.198276
	2	0.581893	0.727477	0.200501
	2.01	0.576333	0.731759	0.202735
	2.02	0.570756	0.736017	0.204977
	2.03	0.565164	0.74025	0.207228
	2.04	0.559556	0.744458	0.209487
	2.05	0.553934	0.74864	0.211754
	2.06	0.548297	0.752797	0.214029
	2.07	0.542645	0.756928	0.216312
	2.08	0.53698	0.761032	0.218603
	2.09	0.531302	0.76511	0.220901
	2.1	0.525611	0.769161	0.223207
	2.11	0.519908	0.773184	0.225521
	2.12	0.514193	0.77718	0.227842
	2.13	0.508466	0.781148	0.23017
	2.14	0.502729	0.785087	0.232505
	2.15	0.49698	0.788998	0.234847
	2.16	0.491222	0.79288	0.237196
	2.17	0.485454	0.796733	0.239551
	2.18	0.479677	0.800557	0.241914
	2.19	0.473891	0.804351	0.244282
	2.2	0.468096	0.808115	0.246657
	2.21	0.462293	0.811849	0.249039
	2.22	0.456483	0.815552	0.251426
	2.23	0.450666	0.819225	0.25382
	2.24	0.444842	0.822866	0.256219
	2.25	0.439012	0.826476	0.258624
	2.26	0.433176	0.830054	0.261035
	2.27	0.427335	0.833601	0.263451
	2.28	0.421488	0.837116	0.265873
	2.29	0.415637	0.840598	0.2683
	2.3	0.409782	0.844047	0.270732
	2.31	0.403923	0.847464	0.273169
	2.32	0.398061	0.850848	0.275611
	2.33	0.392196	0.854198	0.278058
	2.34	0.386328	0.857515	0.280509
	2.35	0.380458	0.860798	0.282965
	2.36	0.374587	0.864047	0.285425
	2.37	0.368714	0.867262	0.28789
	2.38	0.362841	0.870442	0.290358
	2.39	0.356967	0.873588	0.292831
	2.4	0.351093	0.876699	0.295308
	2.41	0.345219	0.879774	0.297788
	2.42	0.339346	0.882815	0.300272
	2.43	0.333474	0.88582	0.30276
	2.44	0.327604	0.888789	0.305251
	2.45	0.321735	0.891722	0.307745
	2.46	0.315869	0.894619	0.310242
	2.47	0.310006	0.89748	0.312742
	2.48	0.304146	0.900304	0.315246
	2.49	0.298289	0.903092	0.317752
	2.5	0.292437	0.905843	0.32026
	2.51	0.286588	0.908557	0.322771
	2.52	0.280745	0.911234	0.325285
	2.53	0.274906	0.913873	0.327801
	2.54	0.269073	0.916475	0.330318
	2.55	0.263245	0.919039	0.332838
	2.56	0.257424	0.921566	0.33536
	2.57	0.251609	0.924054	0.337884
	2.58	0.245801	0.926504	0.340409
	2.59	0.240001	0.928916	0.342935
	2.6	0.234208	0.93129	0.345463
	2.61	0.228423	0.933625	0.347993
	2.62	0.222647	0.935921	0.350523
	2.63	0.216879	0.938178	0.353055
	2.64	0.211121	0.940397	0.355587
	2.65	0.205372	0.942576	0.35812
	2.66	0.199632	0.944716	0.360654
	2.67	0.193904	0.946816	0.363188
	2.68	0.188185	0.948877	0.365722
	2.69	0.182478	0.950899	0.368257
	2.7	0.176781	0.952881	0.370792
	2.71	0.171097	0.954822	0.373327
	2.72	0.165424	0.956724	0.375862
	2.73	0.159764	0.958586	0.378396
	2.74	0.154116	0.960408	0.38093
	2.75	0.148481	0.96219	0.383464
	2.76	0.142859	0.963931	0.385997
	2.77	0.137251	0.965632	0.388529
	2.78	0.131657	0.967292	0.391061
	2.79	0.126078	0.968912	0.393591
	2.8	0.120513	0.970491	0.396121
	2.81	0.114962	0.972029	0.398649
	2.82	0.109428	0.973527	0.401176
	2.83	0.103908	0.974983	0.403701
	2.84	0.0984049	0.976399	0.406225
	2.85	0.0929177	0.977773	0.408747
	2.86	0.087447	0.979107	0.411268
	2.87	0.0819932	0.980399	0.413786
	2.88	0.0765565	0.98165	0.416302
	2.89	0.0711372	0.98286	0.418816
	2.9	0.0657357	0.984029	0.421328
	2.91	0.0603522	0.985156	0.423837
	2.92	0.0549871	0.986242	0.426344
	2.93	0.0496406	0.987286	0.428849
	2.94	0.0443131	0.988289	0.43135
	2.95	0.0390047	0.98925	0.433849
	2.96	0.0337159	0.99017	0.436344
	2.97	0.0284469	0.991049	0.438837
	2.98	0.023198	0.991885	0.441326
	2.99	0.0179694	0.99268	0.443812
	3	0.0127614	0.993434	0.446294
	3.01	0.00757442	0.994146	0.448773
	3.02	0.00240858	0.994816	0.451248
	3.03	0	0.995445	0.453719
	3.04	0	0.996031	0.456187
	3.05	0	0.996577	0.45865
	3.06	0	0.99708	0.461109
	3.07	0	0.997542	0.463565
	3.08	0	0.997963	0.466015
	3.09	0	0.998343	0.468462
	3.1	0	0.998683	0.470903
	3.11	0	0.998982	0.47334
	3.12	0	0.999242	0.475773
	3.13	0	0.999463	0.4782
	3.14	0	0.999645	0.480623
	3.15	0	0.999789	0.48304
	3.16	0	0.999896	0.485453
	3.17	0	0.999966	0.48786
	3.18	0	1	0.490262
	3.19	0	0.999998	0.492658
	3.2	0	0.999961	0.49505
	3.21	0	0.999889	0.497435
	3.22	0	0.999784	0.499816
	3.23	0	0.999645	0.50219
	3.24	0	0.999473	0.504559
	3.25	0	0.999269	0.506922
	3.26	0	0.999033	0.509279
	3.27	0	0.998766	0.51163
	3.28	0	0.998469	0.513975
	3.29	0	0.998141	0.516314
	3.3	0	0.997784	0.518647
	3.31	0	0.997398	0.520974
	3.32	0	0.996983	0.523295
	3.33	0	0.99654	0.525609
	3.34	0	0.99607	0.527917
	3.35	0	0.995573	0.530219
	3.36	0	0.995049	0.532514
	3.37	0	0.994499	0.534803
	3.38	0	0.993923	0.537085
	3.39	0	0.993323	0.539361
	3.4	0	0.992697	0.54163
	3.41	0	0.992048	0.543892
	3.42	0	0.991374	0.546148
	3.43	0	0.990677	0.548397
	3.44	0	0.989957	0.550639
	3.45	0	0.989214	0.552874
	3.46	0	0.98845	0.555103
	3.47	0	0.987663	0.557324
	3.48	0	0.986855	0.559539
	3.49	0	0.986026	0.561747
	3.5	0	0.985176	0.563947
	3.51	0	0.984306	0.566141
	3.52	0	0.983417	0.568327
	3.53	0	0.982507	0.570507
	3.54	0	0.981579	0.572679
	3.55	0	0.980631	0.574845
	3.56	0	0.979665	0.577003
	3.57	0	0.978681	0.579154
	3.58	0	0.977679	0.581297
	3.59	0	0.976659	0.583434
	3.6	0	0.975622	0.585563
	3.61	0	0.974568	0.587685
	3.62	0	0.973498	0.5898
	3.63	0	0.972411	0.591907
	3.64	0	0.971308	0.594007
	3.65	0	0.970189	0.5961
	3.66	0	0.969055	0.598186
	3.67	0	0.967906	0.600264
	3.68	0	0.966742	0.602334
	3.69	0	0.965563	0.604397
	3.7	0	0.96437	0.606453
	3.71	0	0.963162	0.608502
	3.72	0	0.961941	0.610543
	3.73	0	0.960706	0.612576
	3.74	0	0.959458	0.614602
	3.75	0	0.958197	0.616621
	3.76	0	0.956923	0.618632
	3.77	0	0.955636	0.620636
	3.78	0	0.954337	0.622632
	3.79	0	0.953025	0.624621
	3.8	0	0.951702	0.626602
	3.81	0	0.950366	0.628576
	3.82	0	0.949019	0.630542
	3.83	0	0.947661	0.632501
	3.84	0	0.946292	0.634452
	3.85	0	0.944912	0.636396
	3.86	0	0.943521	0.638332
	3.87	0	0.942119	0.640261
	3.88	0	0.940707	0.642182
	3.89	0	0.939285	0.644096
	3.9	0	0.937853	0.646002
	3.91	0	0.936411	0.647901
	3.92	0	0.93496	0.649792
	3.93	0	0.933499	0.651676
	3.94	0	0.932028	0.653553
	3.95	0	0.930549	0.655421
	3.96	0	0.929061	0.657283
	3.97	0	0.927564	0.659136
	3.98	0	0.926058	0.660983
	3.99	0	0.924544	0.662822
	4	0	0.923022	0.664653
	4.01	0	0.921491	0.666477
	4.02	0	0.919952	0.668294
	4.03	0	0.918406	0.670103
	4.04	0	0.916852	0.671904
	4.05	0	0.91529	0.673699
	4.06	0	0.913721	0.675485
	4.07	0	0.912145	0.677265
	4.08	0	0.910561	0.679037
	4.09	0	0.908971	0.680802
	4.1	0	0.907373	0.682559
	4.11	0	0.905769	0.684309
	4.12	0	0.904158	0.686051
	4.13	0	0.902541	0.687786
	4.14	0	0.900917	0.689514
	4.15	0	0.899287	0.691235
	4.16	0	0.897651	0.692948
	4.17	0	0.896008	0.694654
	4.18	0	0.89436	0.696352
	4.19	0	0.892706	0.698044
	4.2	0	0.891046	0.699728
	4.21	0	0.889381	0.701405
	4.22	0	0.88771	0.703074
	4.23	0	0.886034	0.704737
	4.24	0	0.884352	0.706392
	4.25	0	0.882666	0.70804
	4.26	0	0.880974	0.70968
	4.27	0	0.879277	0.711314
	4.28	0	0.877576	0.712941
	4.29	0	0.875869	0.71456
	4.3	0	0.874158	0.716172
	4.31	0	0.872442	0.717777
	4.32	0	0.870722	0.719375
	4.33	0	0.868997	0.720966
	4.34	0	0.867268	0.72255
	4.35	0	0.865534	0.724127
	4.36	0	0.863796	0.725697
	4.37	0	0.862055	0.72726
	4.38	0	0.860309	0.728816
	4.39	0	0.858559	0.730364
	4.4	0	0.856805	0.731906
	4.41	0	0.855048	0.733441
	4.42	0	0.853286	0.73497
	4.43	0	0.851522	0.736491
	4.44	0	0.849753	0.738005
	4.45	0	0.847981	0.739513
	4.46	0	0.846206	0.741013
	4.47	0	0.844427	0.742507
	4.48	0	0.842645	0.743994
	4.49	0	0.840859	0.745474
	4.5	0	0.839071	0.746948
	4.51	0	0.837279	0.748414
	4.52	0	0.835484	0.749874
	4.53	0	0.833686	0.751327
	4.54	0	0.831886	0.752774
	4.55	0	0.830082	0.754214
	4.56	0	0.828276	0.755647
	4.57	0	0.826467	0.757074
	4.58	0	0.824655	0.758494
	4.59	0	0.82284	0.759907
	4.6	0	0.821023	0.761314
	4.61	0	0.819204	0.762714
	4.62	0	0.817382	0.764108
	4.63	0	0.815557	0.765495
	4.64	0	0.81373	0.766876
	4.65	0	0.811901	0.76825
	4.66	0	0.810069	0.769618
	4.67	0	0.808235	0.770979
	4.68	0	0.806399	0.772334
	4.69	0	0.804561	0.773683
	4.7	0	0.802721	0.775025
	4.71	0	0.800879	0.776361
	4.72	0	0.799034	0.77769
	4.73	0	0.797188	0.779013
	4.74	0	0.79534	0.78033
	4.75	0	0.79349	0.781641
	4.76	0	0.791638	0.782945
	4.77	0	0.789784	0.784243
	4.78	0	0.787929	0.785535
	4.79	0	0.786072	0.786821
	4.8	0	0.784213	0.788101
	4.81	0	0.782352	0.789374
	4.82	0	0.78049	0.790641
	4.83	0	0.778627	0.791903
	4.84	0	0.776761	0.793158
	4.85	0	0.774895	0.794407
	4.86	0	0.773027	0.79565
	4.87	0	0.771157	0.796887
	4.88	0	0.769286	0.798118
	4.89	0	0.767414	0.799343
	4.9	0	0.76554	0.800562
	4.91	0	0.763665	0.801776
	4.92	0	0.761789	0.802983
	4.93	0	0.759912	0.804184
	4.94	0	0.758033	0.80538
	4.95	0	0.756153	0.80657
	4.96	0	0.754272	0.807753
	4.97	0	0.75239	0.808932
	4.98	0	0.750507	0.810104
	4.99	0	0.748623	0.81127
	5	0	0.746738	0.812431
	5.01	0	0.744852	0.813586
	5.02	0	0.742965	0.814736
	5.03	0	0.741077	0.815879
	5.04	0	0.739188	0.817017
	5.05	0	0.737298	0.81815
	5.06	0	0.735407	0.819277
	5.07	0	0.733516	0.820398
	5.08	0	0.731623	0.821514
	5.09	0	0.72973	0.822624
	5.1	0	0.727836	0.823728
	5.11	0	0.725941	0.824827
	5.12	0	0.724046	0.825921
	5.13	0	0.72215	0.827009
	5.14	0	0.720253	0.828092
	5.15	0	0.718356	0.829169
	5.16	0	0.716458	0.830241
	5.17	0	0.714559	0.831308
	5.18	0	0.71266	0.832369
	5.19	0	0.71076	0.833424
	5.2	0	0.708859	0.834475
	5.21	0	0.706959	0.83552
	5.22	0	0.705057	0.83656
	5.23	0	0.703155	0.837595
	5.24	0	0.701253	0.838624
	5.25	0	0.69935	0.839648
	5.26	0	0.697447	0.840667
	5.27	0	0.695543	0.841681
	5.28	0	0.693639	0.84269
	5.29	0	0.691735	0.843694
	5.3	0	0.68983	0.844692
	5.31	0	0.687925	0.845686
	5.32	0	0.68602	0.846674
	5.33	0	0.684114	0.847657
	5.34	0	0.682208	0.848635
	5.35	0	0.680301	0.849609
	5.36	0	0.678395	0.850577
	5.37	0	0.676488	0.85154
	5.38	0	0.674581	0.852499
	5.39	0	0.672674	0.853452
	5.4	0	0.670766	0.8544
	5.41	0	0.668859	0.855344
	5.42	0	0.666951	0.856283
	5.43	0	0.665043	0.857217
	5.44	0	0.663135	0.858146
	5.45	0	0.661227	0.85907
	5.46	0	0.659319	0.85999
	5.47	0	0.65741	0.860905
	5.48	0	0.655502	0.861815
	5.49	0	0.653593	0.86272
	5.5	0	0.651685	0.86362
	5.51	0	0.649776	0.864516
	5.52	0	0.647867	0.865407
	5.53	0	0.645959	0.866294
	5.54	0	0.64405	0.867176
	5.55	0	0.642141	0.868053
	5.56	0	0.640233	0.868926
	5.57	0	0.638324	0.869794
	5.58	0	0.636416	0.870658
	5.59	0	0.634507	0.871517
	5.6	0	0.632599	0.872372
	5.61	0	0.630691	0.873222
	5.62	0	0.628782	0.874067
	5.63	0	0.626874	0.874909
	5.64	0	0.624966	0.875745
	5.65	0	0.623058	0.876578
	5.66	0	0.621151	0.877406
	5.67	0	0.619243	0.878229
	5.68	0	0.617336	0.879048
	5.69	0	0.615429	0.879863
	5.7	0	0.613522	0.880674
	5.71	0	0.611615	0.88148
	5.72	0	0.609708	0.882282
	5.73	0	0.607802	0.88308
	5.74	0	0.605896	0.883873
	5.75	0	0.60399	0.884662
	5.76	0	0.602084	0.885447
	5.77	0	0.600179	0.886228
	5.78	0	0.598273	0.887004
	5.79	0	0.596369	0.887777
	5.8	0	0.594464	0.888545
	5.81	0	0.59256	0.889309
	5.82	0	0.590656	0.89007
	5.83	0	0.588752	0.890826
	5.84	0	0.586849	0.891577
	5.85	0	0.584946	0.892325
	5.86	0	0.583043	0.893069
	5.87	0	0.581141	0.893809
	5.88	0	0.579239	0.894545
	5.89	0	0.577337	0.895277
	5.9	0	0.575436	0.896005
	5.91	0	0.573535	0.896729
	5.92	0	0.571635	0.897449
	5.93	0	0.569735	0.898165
	5.94	0	0.567835	0.898877
	5.95	0	0.565936	0.899585
	5.96	0	0.564037	0.90029
	5.97	0	0.562139	0.90099
	5.98	0	0.560241	0.901687
	5.99	0	0.558344	0.90238
	6	0	0.556447	0.903069
	6.01	0	0.554551	0.903755
	6.02	0	0.552655	0.904437
	6.03	0	0.550759	0.905115
	6.04	0	0.548864	0.905789
	6.05	0	0.54697	0.906459
	6.06	0	0.545076	0.907126
	6.07	0	0.543182	0.907789
	6.08	0	0.54129	0.908449
	6.09	0	0.539397	0.909105
	6.1	0	0.537505	0.909757
	6.11	0	0.535614	0.910405
	6.12	0	0.533724	0.91105
	6.13	0	0.531833	0.911692
	6.14	0	0.529944	0.91233
	6.15	0	0.528055	0.912964
	6.16	0	0.526167	0.913595
	6.17	0	0.524279	0.914222
	6.18	0	0.522392	0.914846
	6.19	0	0.520505	0.915466
	6.2	0	0.51862	0.916083
	6.21	0	0.516734	0.916697
	6.22	0	0.51485	0.917307
	6.23	0	0.512966	0.917913
	6.24	0	0.511083	0.918516
	6.25	0	0.5092	0.919116
	6.26	0	0.507318	0.919712
	6.27	0	0.505437	0.920305
	6.28	0	0.503556	0.920895
	6.29	0	0.501677	0.921481
	6.3	0	0.499798	0.922064
	6.31	0	0.497919	0.922644
	6.32	0	0.496041	0.923221
	6.33	0	0.494165	0.923794
	6.34	0	0.492288	0.924364
	6.35	0	0.490413	0.92493
	6.36	0	0.488538	0.925494
	6.37	0	0.486664	0.926054
	6.38	0	0.484791	0.926611
	6.39	0	0.482919	0.927165
	6.4	0	0.481047	0.927716
	6.41	0	0.479176	0.928263
	6.42	0	0.477306	0.928808
	6.43	0	0.475437	0.929349
	6.44	0	0.473568	0.929887
	6.45	0	0.471701	0.930422
	6.46	0	0.469834	0.930954
	6.47	0	0.467968	0.931483
	6.48	0	0.466103	0.932009
	6.49	0	0.464239	0.932532
	6.5	0	0.462376	0.933052
	6.51	0	0.460513	0.933569
	6.52	0	0.458652	0.934082
	6.53	0	0.456791	0.934593
	6.54	0	0.454931	0.935101
	6.55	0	0.453072	0.935606
	6.56	0	0.451214	0.936108
	6.57	0	0.449357	0.936607
	6.58	0	0.447501	0.937103
	6.59	0	0.445646	0.937596
	6.6	0	0.443792	0.938087
	6.61	0	0.441938	0.938574
	6.62	0	0.440086	0.939059
	6.63	0	0.438235	0.939541
	6.64	0	0.436384	0.94002
	6.65	0	0.434535	0.940496
	6.66	0	0.432686	0.940969
	6.67	0	0.430839	0.941439
	6.68	0	0.428993	0.941907
	6.69	0	0.427147	0.942372
	6.7	0	0.425303	0.942834
	6.71	0	0.42346	0.943294
	6.72	0	0.421618	0.94375
	6.73	0	0.419776	0.944204
	6.74	0	0.417936	0.944656
	6.75	0	0.416097	0.945104
	6.76	0	0.414259	0.94555
	6.77	0	0.412422	0.945993
	6.78	0	0.410587	0.946434
	6.79	0	0.408752	0.946872
	6.8	0	0.406919	0.947307
	6.81	0	0.405086	0.94774
	6.82	0	0.403255	0.94817
	6.83	0	0.401425	0.948597
	6.84	0	0.399596	0.949022
	6.85	0	0.397768	0.949444
	6.86	0	0.395942	0.949864
	6.87	0	0.394116	0.950281
	6.88	0	0.392292	0.950696
	6.89	0	0.390469	0.951108
	6.9	0	0.388647	0.951517
	6.91	0	0.386827	0.951924
	6.92	0	0.385008	0.952329
	6.93	0	0.38319	0.952731
	6.94	0	0.381373	0.953131
	6.95	0	0.379557	0.953528
	6.96	0	0.377743	0.953923
	6.97	0	0.37593	0.954315
	6.98	0	0.374118	0.954705
	6.99	0	0.372308	0.955092
	7	0	0.370499	0.955478
	7.01	0	0.368691	0.95586
	7.02	0	0.366885	0.956241
	7.03	0	0.36508	0.956619
	7.04	0	0.363277	0.956994
	7.05	0	0.361474	0.957367
	7.06	0	0.359674	0.957738
	7.07	0	0.357874	0.958107
	7.08	0	0.356076	0.958473
	7.09	0	0.354279	0.958837
	7.1	0	0.352484	0.959199
	7.11	0	0.350691	0.959558
	7.12	0	0.348898	0.959915
	7.13	0	0.347108	0.96027
	7.14	0	0.345318	0.960623
	7.15	0	0.343531	0.960973
	7.16	0	0.341744	0.961321
	7.17	0	0.33996	0.961667
	7.18	0	0.338176	0.962011
	7.19	0	0.336395	0.962353
	7.2	0	0.334615	0.962692
	7.21	0	0.332836	0.963029
	7.22	0	0.331059	0.963364
	7.23	0	0.329284	0.963697
	7.24	0	0.32751	0.964028
	7.25	0	0.325738	0.964356
	7.26	0	0.323967	0.964683
	7.27	0	0.322199	0.965007
	7.28	0	0.320432	0.965329
	7.29	0	0.318666	0.96565
	7.3	0	0.316902	0.965968
	7.31	0	0.31514	0.966284
	7.32	0	0.31338	0.966598
	7.33	0	0.311621	0.966909
	7.34	0	0.309865	0.967219
	7.35	0	0.30811	0.967527
	7.36	0	0.306356	0.967833
	7.37	0	0.304605	0.968137
	7.38	0	0.302855	0.968438
	7.39	0	0.301107	0.968738
	7.4	0	0.299361	0.969036
	7.41	0	0.297617	0.969332
	7.42	0	0.295875	0.969625
	7.43	0	0.294135	0.969917
	7.44	0	0.292396	0.970207
	7.45	0	0.29066	0.970495
	7.46	0	0.288925	0.970781
	7.47	0	0.287193	0.971065
	7.48	0	0.285462	0.971347
	7.49	0	0.283734	0.971627
	7.5	0	0.282007	0.971906
	7.51	0	0.280283	0.972182
	7.52	0	0.27856	0.972457
	7.53	0	0.27684	0.972729
	7.54	0	0.275122	0.973
	7.55	0	0.273405	0.973269
	7.56	0	0.271691	0.973536
	7.57	0	0.269979	0.973802
	7.58	0	0.26827	0.974065
	7.59	0	0.266562	0.974327
	7.6	0	0.264857	0.974587
	7.61	0	0.263154	0.974845
	7.62	0	0.261453	0.975101
	7.63	0	0.259754	0.975356
	7.64	0	0.258058	0.975608
	7.65	0	0.256364	0.975859
	7.66	0	0.254672	0.976108
	7.67	0	0.252983	0.976356
	7.68	0	0.251296	0.976601
	7.69	0	0.249611	0.976845
	7.7	0	0.247929	0.977088
	7.71	0	0.246249	0.977328
	7.72	0	0.244572	0.977567
	7.73	0	0.242897	0.977804
	7.74	0	0.241225	0.978039
	7.75	0	0.239555	0.978273
	7.76	0	0.237888	0.978505
	7.77	0	0.236223	0.978735
	7.78	0	0.234561	0.978964
	7.79	0	0.232902	0.979191
	7.8	0	0.231245	0.979416
	7.81	0	0.229591	0.97964
	7.82	0	0.22794	0.979862
	7.83	0	0.226291	0.980083
	7.84	0	0.224645	0.980302
	7.85	0	0.223002	0.980519
	7.86	0	0.221362	0.980734
	7.87	0	0.219725	0.980949
	7.88	0	0.21809	0.981161
	7.89	0	0.216458	0.981372
	7.9	0	0.21483	0.981581
	7.91	0	0.213204	0.981789
	7.92	0	0.211581	0.981995
	7.93	0	0.209961	0.9822
	7.94	0	0.208344	0.982403
	7.95	0	0.20673	0.982605
	7.96	0	0.20512	0.982805
	7.97	0	0.203512	0.983003
	7.98	0	0.201908	0.9832
	7.99	0	0.200307	0.983396
	8	0	0.198709	0.98359
	8.01	0	0.197114	0.983782
	8.02	0	0.195523	0.983973
	8.03	0	0.193934	0.984163
	8.04	0	0.19235	0.984351
	8.05	0	0.190768	0.984538
	8.06	0	0.18919	0.984723
	8.07	0	0.187616	0.984906
	8.08	0	0.186045	0.985089
	8.09	0	0.184477	0.98527
	8.1	0	0.182913	0.985449
	8.11	0	0.181353	0.985627
	8.12	0	0.179796	0.985804
	8.13	0	0.178243	0.985979
	8.14	0	0.176693	0.986153
	8.15	0	0.175148	0.986325
	8.16	0	0.173606	0.986496
	8.17	0	0.172068	0.986665
	8.18	0	0.170534	0.986834
	8.19	0	0.169003	0.987001
	8.2	0	0.167477	0.987166
	8.21	0	0.165955	0.98733
	8.22	0	0.164436	0.987493
	8.23	0	0.162922	0.987654
	8.24	0	0.161412	0.987815
	8.25	0	0.159906	0.987973
	8.26	0	0.158404	0.988131
	8.27	0	0.156906	0.988287
	8.28	0	0.155413	0.988442
	8.29	0	0.153924	0.988595
	8.3	0	0.152439	0.988747
	8.31	0	0.150959	0.988898
	8.32	0	0.149483	0.989048
	8.33	0	0.148012	0.989196
	8.34	0	0.146545	0.989343
	8.35	0	0.145083	0.989489
	8.36	0	0.143625	0.989634
	8.37	0	0.142172	0.989777
	8.38	0	0.140724	0.989919
	8.39	0	0.139281	0.99006
	8.4	0	0.137842	0.9902
	8.41	0	0.136409	0.990338
	8.42	0	0.13498	0.990475
	8.43	0	0.133557	0.990611
	8.44	0	0.132138	0.990745
	8.45	0	0.130725	0.990879
	8.46	0	0.129316	0.991011
	8.47	0	0.127913	0.991142
	8.48	0	0.126515	0.991272
	8.49	0	0.125123	0.991401
	8.5	0	0.123736	0.991528
	8.51	0	0.122354	0.991655
	8.52	0	0.120978	0.99178
	8.53	0	0.119607	0.991904
	8.54	0	0.118242	0.992027
	8.55	0	0.116883	0.992148
	8.56	0	0.11553	0.992269
	8.57	0	0.114182	0.992388
	8.58	0	0.11284	0.992506
	8.59	0	0.111504	0.992623
	8.6	0	0.110174	0.992739
	8.61	0	0.108849	0.992854
	8.62	0	0.107531	0.992968
	8.63	0	0.10622	0.993081
	8.64	0	0.104914	0.993192
	8.65	0	0.103615	0.993303
	8.66	0	0.102322	0.993412
	8.67	0	0.101035	0.99352
	8.68	0	0.0997552	0.993627
	8.69	0	0.0984816	0.993733
	8.7	0	0.0972147	0.993838
	8.71	0	0.0959545	0.993942
	8.72	0	0.094701	0.994045
	8.73	0	0.0934543	0.994147
	8.74	0	0.0922145	0.994248
	8.75	0	0.0909816	0.994347
	8.76	0	0.0897557	0.994446
	8.77	0	0.088537	0.994544
	8.78	0	0.0873253	0.99464
	8.79	0	0.0861209	0.994736
	8.8	0	0.0849238	0.99483
	8.81	0	0.083734	0.994924
	8.82	0	0.0825517	0.995016
	8.83	0	0.0813769	0.995108
	8.84	0	0.0802096	0.995198
	8.85	0	0.07905	0.995288
	8.86	0	0.077898	0.995376
	8.87	0	0.0767539	0.995464
	8.88	0	0.0756176	0.995551
	8.89	0	0.0744892	0.995636
	8.9	0	0.0733688	0.995721
	8.91	0	0.0722564	0.995804
	8.92	0	0.0711522	0.995887
	8.93	0	0.0700561	0.995969
	8.94	0	0.0689683	0.996049
	8.95	0	0.0678889	0.996129
	8.96	0	0.0668178	0.996208
	8.97	0	0.0657552	0.996286
	8.98	0	0.0647012	0.996363
	8.99	0	0.0636557	0.996439
	9	0	0.0626189	0.996514
	9.01	0	0.0615908	0.996588
	9.02	0	0.0605716	0.996661
	9.03	0	0.0595611	0.996733
	9.04	0	0.0585596	0.996805
	9.05	0	0.0575671	0.996875
	9.06	0	0.0565836	0.996945
	9.07	0	0.0556092	0.997013
	9.08	0	0.054644	0.997081
	9.09	0	0.053688	0.997148
	9.1	0	0.0527413	0.997214
	9.11	0	0.0518038	0.997279
	9.12	0	0.0508758	0.997343
	9.13	0	0.0499572	0.997407
	9.14	0	0.0490481	0.997469
	9.15	0	0.0481486	0.997531
	9.16	0	0.0472586	0.997591
	9.17	0	0.0463782	0.997651
	9.18	0	0.0455075	0.99771
	9.19	0	0.0446466	0.997769
	9.2	0	0.0437954	0.997826
	9.21	0	0.0429539	0.997882
	9.22	0	0.0421223	0.997938
	9.23	0	0.0413006	0.997993
	9.24	0	0.0404887	0.998047
	9.25	0	0.0396868	0.9981
	9.26	0	0.0388948	0.998152
	9.27	0	0.0381128	0.998204
	9.28	0	0.0373408	0.998255
	9.29	0	0.0365788	0.998305
	9.3	0	0.0358268	0.998354
	9.31	0	0.0350849	0.998402
	9.32	0	0.034353	0.99845
	9.33	0	0.0336311	0.998496
	9.34	0	0.0329194	0.998542
	9.35	0	0.0322177	0.998587
	9.36	0	0.031526	0.998632
	9.37	0	0.0308445	0.998675
	9.38	0	0.0301729	0.998718
	9.39	0	0.0295115	0.99876
	9.4	0	0.02886	0.998801
	9.41	0	0.0282186	0.998842
	9.42	0	0.0275872	0.998882
	9.43	0	0.0269657	0.99892
	9.44	0	0.0263542	0.998959
	9.45	0	0.0257526	0.998996
	9.46	0	0.0251608	0.999033
	9.47	0	0.024579	0.999069
	9.48	0	0.0240069	0.999104
	9.49	0	0.0234446	0.999139
	9.5	0	0.022892	0.999172
	9.51	0	0.0223491	0.999205
	9.52	0	0.0218157	0.999238
	9.53	0	0.021292	0.999269
	9.54	0	0.0207778	0.9993
	9.55	0	0.020273	0.99933
	9.56	0	0.0197775	0.99936
	9.57	0	0.0192914	0.999388
	9.58	0	0.0188146	0.999416
	9.59	0	0.0183469	0.999444
	9.6	0	0.0178883	0.99947
	9.61	0	0.0174387	0.999496
	9.62	0	0.016998	0.999522
	9.63	0	0.0165662	0.999546
	9.64	0	0.0161431	0.99957
	9.65	0	0.0157287	0.999593
	9.66	0	0.0153229	0.999616
	9.67	0	0.0149256	0.999637
	9.68	0	0.0145367	0.999659
	9.69	0	0.0141561	0.999679
	9.7	0	0.0137836	0.999699
	9.71	0	0.0134193	0.999718
	9.72	0	0.013063	0.999737
	9.73	0	0.0127145	0.999754
	9.74	0	0.0123738	0.999772
	9.75	0	0.0120408	0.999788
	9.76	0	0.0117154	0.999804
	9.77	0	0.0113975	0.999819
	9.78	0	0.0110869	0.999834
	9.79	0	0.0107835	0.999848
	9.8	0	0.0104873	0.999861
	9.81	0	0.010198	0.999874
	9.82	0	0.00991569	0.999886
	9.83	0	0.00964015	0.999897
	9.84	0	0.00937128	0.999908
	9.85	0	0.00910897	0.999918
	9.86	0	0.0088531	0.999928
	9.87	0	0.00860357	0.999937
	9.88	0	0.00836024	0.999945
	9.89	0	0.00812302	0.999953
	9.9	0	0.00789179	0.99996
	9.91	0	0.00766642	0.999967
	9.92	0	0.00744682	0.999973
	9.93	0	0.00723286	0.999978
	9.94	0	0.00702443	0.999983
	9.95	0	0.00682143	0.999987
	9.96	0	0.00662374	0.999991
	9.97	0	0.00643125	0.999994
	9.98	0	0.00624385	0.999996
	9.99	0	0.00606144	0.999998
	10	0	0.0058839	0.999999
	10.01	0	0.00571113	1
	10.02	0	0.00554302	1
	10.03	0	0.00537947	1
	10.04	0	0.00522038	0.999999
	10.05	0	0.00506565	0.999997
	10.06	0	0.00491517	0.999995
	10.07	0	0.00476885	0.999992
	10.08	0	0.00462659	0.999989
	10.09	0	0.00448829	0.999985
	10.1	0	0.00435385	0.999981
	10.11	0	0.00422319	0.999976
	10.12	0	0.00409622	0.99997
	10.13	0	0.00397283	0.999964
	10.14	0	0.00385295	0.999958
	10.15	0	0.00373648	0.999951
	10.16	0	0.00362334	0.999943
	10.17	0	0.00351345	0.999935
	10.18	0	0.00340671	0.999926
	10.19	0	0.00330306	0.999917
	10.2	0	0.00320241	0.999907
	10.21	0	0.00310469	0.999897
	10.22	0	0.00300981	0.999886
	10.23	0	0.0029177	0.999875
	10.24	0	0.00282829	0.999863
	10.25	0	0.0027415	0.999851
	10.26	0	0.00265727	0.999838
	10.27	0	0.00257553	0.999825
	10.28	0	0.0024962	0.999811
	10.29	0	0.00241923	0.999797
	10.3	0	0.00234454	0.999782
	10.31	0	0.00227208	0.999767
	10.32	0	0.00220179	0.999751
	10.33	0	0.0021336	0.999735
	10.34	0	0.00206745	0.999718
	10.35	0	0.00200329	0.999701
	10.36	0	0.00194106	0.999683
	10.37	0	0.00188071	0.999665
	10.38	0	0.00182218	0.999646
	10.39	0	0.00176543	0.999627
	10.4	0	0.00171039	0.999607
	10.41	0	0.00165703	0.999587
	10.42	0	0.00160529	0.999566
	10.43	0	0.00155513	0.999545
	10.44	0	0.00150649	0.999524
	10.45	0	0.00145935	0.999502
	10.46	0	0.00141365	0.999479
	10.47	0	0.00136934	0.999456
	10.48	0	0.0013264	0.999433
	10.49	0	0.00128478	0.999409
	10.5	0	0.00124444	0.999385
	10.51	0	0.00120534	0.99936
	10.52	0	0.00116744	0.999335
	10.53	0	0.00113072	0.999309
	10.54	0	0.00109513	0.999283
	10.55	0	0.00106065	0.999256
	10.56	0	0.00102723	0.999229
	10.57	0	0.00099485	0.999202
	10.58	0	0.000963474	0.999174
	10.59	0	0.000933074	0.999146
	10.6	0	0.000903619	0.999117
	10.61	0	0.000875081	0.999088
	10.62	0	0.000847433	0.999058
	10.63	0	0.000820647	0.999028
	10.64	0	0.000794697	0.998998
	10.65	0	0.000769558	0.998967
	10.66	0	0.000745204	0.998936
	10.67	0	0.000721613	0.998904
	10.68	0	0.00069876	0.998872
	10.69	0	0.000676623	0.998839
	10.7	0	0.000655181	0.998807
	10.71	0	0.000634411	0.998773
	10.72	0	0.000614293	0.998739
	10.73	0	0.000594807	0.998705
	10.74	0	0.000575934	0.998671
	10.75	0	0.000557654	0.998636
	10.76	0	0.00053995	0.9986
	10.77	0	0.000522803	0.998565
	10.78	0	0.000506196	0.998528
	10.79	0	0.000490113	0.998492
	10.8	0	0.000474537	0.998455
	10.81	0	0.000459452	0.998418
	10.82	0	0.000444844	0.99838
	10.83	0	0.000430697	0.998342
	10.84	0	0.000416996	0.998303
	10.85	0	0.000403729	0.998264
	10.86	0	0.000390882	0.998225
	10.87	0	0.000378441	0.998186
	10.88	0	0.000366393	0.998146
	10.89	0	0.000354727	0.998105
	10.9	0	0.00034343	0.998064
	10.91	0	0.000332492	0.998023
	10.92	0	0.000321899	0.997982
	10.93	0	0.000311643	0.99794
	10.94	0	0.000301712	0.997898
	10.95	0	0.000292096	0.997855
	10.96	0	0.000282785	0.997812
	10.97	0	0.00027377	0.997769
	10.98	0	0.000265041	0.997725
	10.99	0	0.000256589	0.997681
	11	0	0.000248405	0.997637
	11.01	0	0.000240482	0.997592
	11.02	0	0.00023281	0.997547
	11.03	0	0.000225382	0.997501
	11.04	0	0.000218191	0.997455
	11.05	0	0.000211228	0.997409
	11.06	0	0.000204487	0.997363
	11.07	0	0.00019796	0.997316
	11.08	0	0.000191641	0.997269
	11.09	0	0.000185523	0.997221
	11.1	0	0.000179599	0.997173
	11.11	0	0.000173865	0.997125
	11.12	0	0.000168313	0.997076
	11.13	0	0.000162938	0.997028
	11.14	0	0.000157734	0.996978
	11.15	0	0.000152696	0.996929
	11.16	0	0.000147818	0.996879
	11.17	0	0.000143096	0.996829
	11.18	0	0.000138525	0.996778
	11.19	0	0.000134099	0.996727
	11.2	0	0.000129814	0.996676
	11.21	0	0.000125666	0.996625
	11.22	0	0.00012165	0.996573
	11.23	0	0.000117763	0.996521
	11.24	0	0.000113999	0.996468
	11.25	0	0.000110356	0.996415
	11.26	0	0.000106829	0.996362
	11.27	0	0.000103414	0.996309
	11.28	0	0.000100108	0.996255
	11.29	0	9.6908e-05	0.996201
	11.3	0	9.381e-05	0.996147
	11.31	0	9.08109e-05	0.996092
	11.32	0	8.79075e-05	0.996037
	11.33	0	8.50969e-05	0.995982
	11.34	0	8.2376e-05	0.995926
	11.35	0	7.97421e-05	0.99587
	11.36	0	7.71922e-05	0.995814
	11.37	0	7.47238e-05	0.995758
	11.38	0	7.23343e-05	0.995701
	11.39	0	7.00211e-05	0.995644
	11.4	0	6.77818e-05	0.995587
	11.41	0	6.5614e-05	0.995529
	11.42	0	6.35155e-05	0.995471
	11.43	0	6.14841e-05	0.995413
	11.44	0	5.95176e-05	0.995354
	11.45	0	5.7614e-05	0.995296
	11.46	0	5.57711e-05	0.995237
	11.47	0	5.39872e-05	0.995177
	11.48	0	5.22604e-05	0.995118
	11.49	0	5.05887e-05	0.995058
	11.5	0	4.89704e-05	0.994997
	11.51	0	4.74039e-05	0.994937
	11.52	0	4.58875e-05	0.994876
	11.53	0	4.44195e-05	0.994815
	11.54	0	4.29985e-05	0.994754
	11.55	0	4.1623e-05	0.994692
	11.56	0	4.02914e-05	0.99463
	11.57	0	3.90024e-05	0.994568
	11.58	0	3.77546e-05	0.994506
	11.59	0	3.65467e-05	0.994443
	11.6	0	3.53775e-05	0.99438
	11.61	0	3.42456e-05	0.994317
	11.62	0	3.315e-05	0.994254
	11.63	0	3.20894e-05	0.99419
	11.64	0	3.10627e-05	0.994126
	11.65	0	3.00688e-05	0.994062
	11.66	0	2.91068e-05	0.993997
	11.67	0	2.81755e-05	0.993932
	11.68	0	2.7274e-05	0.993867
	11.69	0	2.64013e-05	0.993802
	11.7	0	2.55566e-05	0.993737
	11.71	0	2.47389e-05	0.993671
	11.72	0	2.39473e-05	0.993605
	11.73	0	2.31811e-05	0.993539
	11.74	0	2.24394e-05	0.993472
	11.75	0	2.17214e-05	0.993405
	11.76	0	2.10264e-05	0.993338
	11.77	0	2.03536e-05	0.993271
	11.78	0	1.97024e-05	0.993203
	11.79	0	1.9072e-05	0.993136
	11.8	0	1.84617e-05	0.993068
	11.81	0	1.7871e-05	0.992999
	11.82	0	1.72992e-05	0.992931
	11.83	0	1.67456e-05	0.992862
	11.84	0	1.62098e-05	0.992793
	11.85	0	1.56912e-05	0.992724
	11.86	0	1.51891e-05	0.992655
	11.87	0	1.47031e-05	0.992585
	11.88	0	1.42327e-05	0.992515
	11.89	0	1.37773e-05	0.992445
	11.9	0	1.33364e-05	0.992375
	11.91	0	1.29097e-05	0.992304
	11.92	0	1.24966e-05	0.992233
	11.93	0	1.20968e-05	0.992162
	11.94	0	1.17098e-05	0.992091
	11.95	0	1.13351e-05	0.99202
	11.96	0	1.09724e-05	0.991948
	11.97	0	1.06213e-05	0.991876
	11.98	0	1.02815e-05	0.991804
	11.99	0	9.95256e-06	0.991731
	12	0	9.63413e-06	0.991659
	12.01	0	9.32588e-06	0.991586
	12.02	0	9.02751e-06	0.991513
	12.03	0	8.73868e-06	0.99144
	12.04	0	8.4591e-06	0.991366
	12.05	0	8.18846e-06	0.991292
	12.06	0	7.92648e-06	0.991219
	12.07	0	7.67289e-06	0.991145
	12.08	0	7.42741e-06	0.99107
	12.09	0	7.18979e-06	0.990996
	12.1	0	6.95977e-06	0.990921
	12.11	0	6.73712e-06	0.990846
	12.12	0	6.52159e-06	0.990771
	12.13	0	6.31295e-06	0.990695
	12.14	0	6.111e-06	0.99062
	12.15	0	5.9155e-06	0.990544
	12.16	0	5.72627e-06	0.990468
	12.17	0	5.54309e-06	0.990392
	12.18	0	5.36577e-06	0.990316
	12.19	0	5.19412e-06	0.990239
	12.2	0	5.02797e-06	0.990162
	12.21	0	4.86714e-06	0.990085
	12.22	0	4.71145e-06	0.990008
	12.23	0	4.56074e-06	0.989931
	12.24	0	4.41486e-06	0.989853
	12.25	0	4.27364e-06	0.989775
	12.26	0	4.13695e-06	0.989698
	12.27	0	4.00463e-06	0.989619
	12.28	0	3.87654e-06	0.989541
	12.29	0	3.75255e-06	0.989463
	12.3	0	3.63253e-06	0.989384
	12.31	0	3.51635e-06	0.989305
	12.32	0	3.40389e-06	0.989226
	12.33	0	3.29503e-06	0.989147
	12.34	0	3.18965e-06	0.989067
	12.35	0	3.08764e-06	0.988987
	12.36	0	2.9889e-06	0.988908
	12.37	0	2.89331e-06	0.988828
	12.38	0	2.80079e-06	0.988747
	12.39	0	2.71122e-06	0.988667
	12.4	0	2.62452e-06	0.988586
	12.41	0	2.5406e-06	0.988506
	12.42	0	2.45936e-06	0.988425
	12.43	0	2.38072e-06	0.988344
	12.44	0	2.3046e-06	0.988262
	12.45	0	2.23091e-06	0.988181
	12.46	0	2.15958e-06	0.988099
	12.47	0	2.09053e-06	0.988018
	12.48	0	2.02369e-06	0.987936
	12.49	0	1.95899e-06	0.987853
	12.5	0	1.89636e-06	0.987771
	12.51	0	1.83573e-06	0.987689
	12.52	0	1.77705e-06	0.987606
	12.53	0	1.72024e-06	0.987523
	12.54	0	1.66524e-06	0.98744
	12.55	0	1.61201e-06	0.987357
	12.56	0	1.56048e-06	0.987274
	12.57	0	1.5106e-06	0.98719
	12.58	0	1.46232e-06	0.987107
	12.59	0	1.41557e-06	0.987023
	12.6	0	1.37033e-06	0.986939
	12.61	0	1.32653e-06	0.986855
	12.62	0	1.28413e-06	0.98677
	12.63	0	1.24309e-06	0.986686
	12.64	0	1.20337e-06	0.986601
	12.65	0	1.16491e-06	0.986516
	12.66	0	1.12768e-06	0.986431
	12.67	0	1.09165e-06	0.986346
	12.68	0	1.05676e-06	0.986261
	12.69	0	1.02299e-06	0.986176
	12.7	0	9.90307e-07	0.98609
	12.71	0	9.58665e-07	0.986004
	12.72	0	9.28035e-07	0.985918
	12.73	0	8.98385e-07	0.985832
	12.74	0	8.69683e-07	0.985746
	12.75	0	8.41898e-07	0.98566
	12.76	0	8.15003e-07	0.985573
	12.77	0	7.88967e-07	0.985487
	12.78	0	7.63765e-07	0.9854
	12.79	0	7.39368e-07	0.985313
	12.8	0	7.15751e-07	0.985226
	12.81	0	6.9289e-07	0.985138
	12.82	0	6.7076e-07	0.985051
	12.83	0	6.49337e-07	0.984963
	12.84	0	6.28599e-07	0.984876
	12.85	0	6.08525e-07	0.984788
	12.86	0	5.89092e-07	0.9847
	12.87	0	5.70281e-07	0.984612
	12.88	0	5.52071e-07	0.984524
	12.89	0	5.34444e-07	0.984435
	12.9	0	5.1738e-07	0.984347
	12.91	0	5.00861e-07	0.984258
	12.92	0	4.84871e-07	0.984169
	12.93	0	4.69392e-07	0.98408
	12.94	0	4.54408e-07	0.983991
	12.95	0	4.39902e-07	0.983902
	12.96	0	4.25861e-07	0.983812
	12.97	0	4.12268e-07	0.983723
	12.98	0	3.9911e-07	0.983633
	12.99	0	3.86373e-07	0.983543
	13	0	3.74042e-07	0.983453
	13.01	0	3.62106e-07	0.983363
	13.02	0	3.50551e-07	0.983273
	13.03	0	3.39366e-07	0.983183
	13.04	0	3.28538e-07	0.983092
	13.05	0	3.18056e-07	0.983002
	13.06	0	3.07909e-07	0.982911
	13.07	0	2.98086e-07	0.98282
	13.08	0	2.88577e-07	0.982729
	13.09	0	2.79372e-07	0.982638
	13.1	0	2.70462e-07	0.982547
	13.11	0	2.61836e-07	0.982456
	13.12	0	2.53485e-07	0.982364
	13.13	0	2.45402e-07	0.982272
	13.14	0	2.37576e-07	0.982181
	13.15	0	2.30001e-07	0.982089
	13.16	0	2.22668e-07	0.981997
	13.17	0	2.15569e-07	0.981905
	13.18	0	2.08696e-07	0.981812
	13.19	0	2.02044e-07	0.98172
	13.2	0	1.95603e-07	0.981628
	13.21	0	1.89369e-07	0.981535
	13.22	0	1.83334e-07	0.981442
	13.23	0	1.77491e-07	0.981349
	13.24	0	1.71835e-07	0.981256
	13.25	0	1.6636e-07	0.981163
	13.26	0	1.61059e-07	0.98107
	13.27	0	1.55928e-07	0.980977
	13.28	0	1.50961e-07	0.980883
	13.29	0	1.46152e-07	0.98079
	13.3	0	1.41497e-07	0.980696
	13.31	0	1.3699e-07	0.980602
	13.32	0	1.32628e-07	0.980508
	13.33	0	1.28404e-07	0.980414
	13.34	0	1.24316e-07	0.98032
	13.35	0	1.20358e-07	0.980226
	13.36	0	1.16526e-07	0.980132
	13.37	0	1.12817e-07	0.980037
	13.38	0	1.09226e-07	0.979943
	13.39	0	1.05749e-07	0.979848
	13.4	0	1.02384e-07	0.979753
	13.41	0	9.91258e-08	0.979658
	13.42	0	9.59717e-08	0.979563
	13.43	0	9.29184e-08	0.979468
	13.44	0	8.99624e-08	0.979373
	13.45	0	8.71008e-08	0.979278
	13.46	0	8.43304e-08	0.979182
	13.47	0	8.16485e-08	0.979087
	13.48	0	7.90521e-08	0.978991
	13.49	0	7.65385e-08	0.978895
	13.5	0	7.41051e-08	0.978799
	13.51	0	7.17493e-08	0.978703
	13.52	0	6.94687e-08	0.978607
	13.53	0	6.72608e-08	0.978511
	13.54	0	6.51233e-08	0.978415
	13.55	0	6.3054e-08	0.978318
	13.56	0	6.10506e-08	0.978222
	13.57	0	5.91112e-08	0.978125
	13.58	0	5.72335e-08	0.978028
	13.59	0	5.54158e-08	0.977932
	13.6	0	5.36559e-08	0.977835
	13.61	0	5.19522e-08	0.977738
	13.62	0	5.03028e-08	0.977641
	13.63	0	4.87059e-08	0.977543
	13.64	0	4.716e-08	0.977446
	13.65	0	4.56633e-08	0.977349
	13.66	0	4.42143e-08	0.977251
	13.67	0	4.28114e-08	0.977154
	13.68	0	4.14533e-08	0.977056
	13.69	0	4.01384e-08	0.976958
	13.7	0	3.88654e-08	0.97686
	13.71	0	3.7633e-08	0.976762
	13.72	0	3.64398e-08	0.976664
	13.73	0	3.52846e-08	0.976566
	13.74	0	3.41662e-08	0.976468
	13.75	0	3.30834e-08	0.97637
	13.76	0	3.20351e-08	0.976271
	13.77	0	3.10202e-08	0.976173
	13.78	0	3.00376e-08	0.976074
	13.79	0	2.90862e-08	0.975975
	13.8	0	2.81651e-08	0.975877
	13.81	0	2.72734e-08	0.975778
	13.82	0	2.641e-08	0.975679
	13.83	0	2.55741e-08	0.97558
	13.84	0	2.47648e-08	0.97548
	13.85	0	2.39812e-08	0.975381
	13.86	0	2.32226e-08	0.975282
	13.87	0	2.24881e-08	0.975182
	13.88	0	2.1777e-08	0.975083
	13.89	0	2.10884e-08	0.974983
	13.9	0	2.04218e-08	0.974884
	13.91	0	1.97764e-08	0.974784
	13.92	0	1.91514e-08	0.974684
	13.93	0	1.85464e-08	0.974584
	13.94	0	1.79606e-08	0.974484
	13.95	0	1.73933e-08	0.974384
	13.96	0	1.68442e-08	0.974284
	13.97	0	1.63124e-08	0.974184
	13.98	0	1.57976e-08	0.974083
	13.99	0	1.52991e-08	0.973983
	14	0	1.48165e-08	0.973882
	14.01	0	1.43491e-08	0.973782
	14.02	0	1.38966e-08	0.973681
	14.03	0	1.34585e-08	0.97358
	14.04	0	1.30343e-08	0.973479
	14.05	0	1.26236e-08	0.973378
	14.06	0	1.22259e-08	0.973277
	14.07	0	1.18408e-08	0.973176
	14.08	0	1.14679e-08	0.973075
	14.09	0	1.11069e-08	0.972974
	14.1	0	1.07573e-08	0.972873
	14.11	0	1.04188e-08	0.972771
	14.12	0	1.0091e-08	0.97267
	14.13	0	9.77366e-09	0.972568
	14.14	0	9.46635e-09	0.972467
	14.15	0	9.16878e-09	0.972365
	14.16	0	8.88065e-09	0.972263
	14.17	0	8.60164e-09	0.972161
	14.18	0	8.33147e-09	0.972059
	14.19	0	8.06987e-09	0.971957
	14.2	0	7.81654e-09	0.971855
	14.21	0	7.57125e-09	0.971753
	14.22	0	7.33371e-09	0.971651
	14.23	0	7.1037e-09	0.971549
	14.24	0	6.88097e-09	0.971446
	14.25	0	6.66529e-09	0.971344
	14.26	0	6.45643e-09	0.971241
	14.27	0	6.25418e-09	0.971139
	14.28	0	6.05833e-09	0.971036
	14.29	0	5.86867e-09	0.970933
	14.3	0	5.68501e-09	0.970831
	14.31	0	5.50716e-09	0.970728
	14.32	0	5.33492e-09	0.970625
	14.33	0	5.16813e-09	0.970522
	14.34	0	5.00661e-09	0.970419
	14.35	0	4.85019e-09	0.970316
	14.36	0	4.69871e-09	0.970213
	14.37	0	4.55202e-09	0.970109
	14.38	0	4.40996e-09	0.970006
	14.39	0	4.27238e-09	0.969902
	14.4	0	4.13914e-09	0.969799
	14.41	0	4.0101e-09	0.969695
	14.42	0	3.88514e-09	0.969592
	14.43	0	3.76412e-09	0.969488
	14.44	0	3.64691e-09	0.969384
	14.45	0	3.5334e-09	0.969281
	14.46	0	3.42346e-09	0.969177
	14.47	0	3.31699e-09	0.969073
	14.48	0	3.21387e-09	0.968969
	14.49	0	3.114e-09	0.968865
	14.5	0	3.01728e-09	0.968761
	14.51	0	2.9236e-09	0.968657
	14.52	0	2.83287e-09	0.968552
	14.53	0	2.74499e-09	0.968448
	14.54	0	2.65987e-09	0.968344
	14.55	0	2.57744e-09	0.968239
	14.56	0	2.49759e-09	0.968135
	14.57	0	2.42026e-09	0.96803
	14.58	0	2.34535e-09	0.967925
	14.59	0	2.2728e-09	0.967821
	14.6	0	2.20252e-09	0.967716
	14.61	0	2.13445e-09	0.967611
	14.62	0	2.06852e-09	0.967506
	14.63	0	2.00466e-09	0.967401
	14.64	0	1.9428e-09	0.967296
	14.65	0	1.88288e-09	0.967191
	14.66	0	1.82484e-09	0.967086
	14.67	0	1.76861e-09	0.966981
	14.68	0	1.71415e-09	0.966876
	14.69	0	1.6614e-09	0.966771
	14.7	0	1.61029e-09	0.966665
	14.71	0	1.56079e-09	0.96656
	14.72	0	1.51283e-09	0.966455
	14.73	0	1.46638e-09	0.966349
	14.74	0	1.42138e-09	0.966244
	14.75	0	1.37778e-09	0.966138
	14.76	0	1.33555e-09	0.966032
	14.77	0	1.29463e-09	0.965927
	14.78	0	1.25499e-09	0.965821
	14.79	0	1.21659e-09	0.965715
	14.8	0	1.17939e-09	0.965609
	14.81	0	1.14335e-09	0.965503
	14.82	0	1.10843e-09	0.965397
	14.83	0	1.0746e-09	0.965291
	14.84	0	1.04183e-09	0.965185
	14.85	0	1.01007e-09	0.965079
	14.86	0	9.79308e-10	0.964973
	14.87	0	9.495e-10	0.964866
	14.88	0	9.20618e-10	0.96476
	14.89	0	8.92635e-10	0.964654
	14.9	0	8.65521e-10	0.964547
	14.91	0	8.3925e-10	0.964441
	14.92	0	8.13794e-10	0.964334
	14.93	0	7.89129e-10	0.964228
	14.94	0	7.65229e-10	0.964121
	14.95	0	7.4207e-10	0.964014
	14.96	0	7.19629e-10	0.963908
	14.97	0	6.97883e-10	0.963801
	14.98	0	6.76811e-10	0.963694
	14.99	0	6.56391e-10	0.963587
	15	0	6.36603e-10	0.96348
	15.01	0	6.17427e-10	0.963373
	15.02	0	5.98843e-10	0.963266
	15.03	0	5.80834e-10	0.963159
	15.04	0	5.63381e-10	0.963052
	15.05	0	5.46467e-10	0.962945
	15.06	0	5.30074e-10	0.962838
	15.07	0	5.14187e-10	0.962731
	15.08	0	4.98789e-10	0.962623
	15.09	0	4.83866e-10	0.962516
	15.1	0	4.69402e-10	0.962409
	15.11	0	4.55383e-10	0.962301
	15.12	0	4.41795e-10	0.962194
	15.13	0	4.28625e-10	0.962086
	15.14	0	4.1586e-10	0.961979
	15.15	0	4.03486e-10	0.961871
	15.16	0	3.91491e-10	0.961763
	15.17	0	3.79865e-10	0.961656
	15.18	0	3.68595e-10	0.961548
	15.19	0	3.5767e-10	0.96144
	15.2	0	3.47079e-10	0.961332
	15.21	0	3.36812e-10	0.961224
	15.22	0	3.26859e-10	0.961116
	15.23	0	3.1721e-10	0.961008
	15.24	0	3.07856e-10	0.9609
	15.25	0	2.98787e-10	0.960792
	15.26	0	2.89995e-10	0.960684
	15.27	0	2.8147e-10	0.960576
	15.28	0	2.73205e-10	0.960468
	15.29	0	2.65192e-10	0.96036
	15.3	0	2.57422e-10	0.960251
	15.31	0	2.49888e-10	0.960143
	15.32	0	2.42583e-10	0.960035
	15.33	0	2.355e-10	0.959926
	15.34	0	2.28631e-10	0.959818
	15.35	0	2.2197e-10	0.959709
	15.36	0	2.15511e-10	0.959601
	15.37	0	2.09248e-10	0.959492
	15.38	0	2.03174e-10	0.959384
	15.39	0	1.97283e-10	0.959275
	15.4	0	1.9157e-10	0.959166
	15.41	0	1.86029e-10	0.959058
	15.42	0	1.80656e-10	0.958949
	15.43	0	1.75444e-10	0.95884
	15.44	0	1.70389e-10	0.958731
	15.45	0	1.65486e-10	0.958622
	15.46	0	1.6073e-10	0.958513
	15.47	0	1.56117e-10	0.958404
	15.48	0	1.51642e-10	0.958295
	15.49	0	1.47301e-10	0.958186
	15.5	0	1.4309e-10	0.958077
	15.51	0	1.39005e-10	0.957968
	15.52	0	1.35042e-10	0.957859
	15.53	0	1.31197e-10	0.95775
	15.54	0	1.27467e-10	0.957641
	15.55	0	1.23849e-10	0.957531
	15.56	0	1.20338e-10	0.957422
	15.57	0	1.16931e-10	0.957313
	15.58	0	1.13625e-10	0.957203
	15.59	0	1.10418e-10	0.957094
	15.6	0	1.07306e-10	0.956985
	15.61	0	1.04286e-10	0.956875
	15.62	0	1.01355e-10	0.956766
	15.63	0	9.85109e-11	0.956656
	15.64	0	9.57508e-11	0.956547
	15.65	0	9.30722e-11	0.956437
	15.66	0	9.04725e-11	0.956327
	15.67	0	8.79493e-11	0.956218
	15.68	0	8.55003e-11	0.956108
	15.69	0	8.31233e-11	0.955998
	15.7	0	8.08161e-11	0.955888
	15.71	0	7.85765e-11	0.955779
	15.72	0	7.64024e-11	0.955669
	15.73	0	7.42919e-11	0.955559
	15.74	0	7.22431e-11	0.955449
	15.75	0	7.02541e-11	0.955339
	15.76	0	6.83231e-11	0.955229
	15.77	0	6.64482e-11	0.955119
	15.78	0	6.46279e-11	0.955009
	15.79	0	6.28605e-11	0.954899
	15.8	0	6.11443e-11	0.954789
	15.81	0	5.94778e-11	0.954679
	15.82	0	5.78596e-11	0.954568
	15.83	0	5.62882e-11	0.954458
	15.84	0	5.47621e-11	0.954348
	15.85	0	5.32799e-11	0.954238
	15.86	0	5.18405e-11	0.954127
	15.87	0	5.04425e-11	0.954017
	15.88	0	4.90846e-11	0.953907
	15.89	0	4.77656e-11	0.953796
	15.9	0	4.64845e-11	0.953686
	15.91	0	4.52399e-11	0.953576
	15.92	0	4.4031e-11	0.953465
	15.93	0	4.28565e-11	0.953355
	15.94	0	4.17155e-11	0.953244
	15.95	0	4.06069e-11	0.953133
	15.96	0	3.95298e-11	0.953023
	15.97	0	3.84833e-11	0.952912
	15.98	0	3.74664e-11	0.952802
	15.99	0	3.64783e-11	0.952691
	16	0	3.55181e-11	0.95258
	16.01	0	3.45849e-11	0.952469
	16.02	0	3.36781e-11	0.952359
	16.03	0	3.27967e-11	0.952248
	16.04	0	3.19401e-11	0.952137
	16.05	0	3.11076e-11	0.952026
	16.06	0	3.02983e-11	0.951915
	16.07	0	2.95116e-11	0.951804
	16.08	0	2.87469e-11	0.951693
	16.09	0	2.80035e-11	0.951582
	16.1	0	2.72808e-11	0.951471
	16.11	0	2.65782e-11	0.95136
	16.12	0	2.5895e-11	0.951249
	16.13	0	2.52308e-11	0.951138
	16.14	0	2.45849e-11	0.951027
	16.15	0	2.39568e-11	0.950916
	16.16	0	2.33461e-11	0.950805
	16.17	0	2.27521e-11	0.950694
	16.18	0	2.21745e-11	0.950583
	16.19	0	2.16127e-11	0.950471
	16.2	0	2.10663e-11	0.95036
	16.21	0	2.05347e-11	0.950249
	16.22	0	2.00177e-11	0.950137
	16.23	0	1.95148e-11	0.950026
	16.24	0	1.90256e-11	0.949915
	16.25	0	1.85496e-11	0.949803
	16.26	0	1.80865e-11	0.949692
	16.27	0	1.76359e-11	0.949581
	16.28	0	1.71975e-11	0.949469
	16.29	0	1.67709e-11	0.949358
	16.3	0	1.63558e-11	0.949246
	16.31	0	1.59518e-11	0.949135
	16.32	0	1.55586e-11	0.949023
	16.33	0	1.5176e-11	0.948911
	16.34	0	1.48035e-11	0.9488
	16.35	0	1.4441e-11	0.948688
	16.36	0	1.40882e-11	0.948577
	16.37	0	1.37447e-11	0.948465
	16.38	0	1.34103e-11	0.948353
	16.39	0	1.30847e-11	0.948241
	16.4	0	1.27678e-11	0.94813
	16.41	0	1.24591e-11	0.948018
	16.42	0	1.21586e-11	0.947906
	16.43	0	1.1866e-11	0.947794
	16.44	0	1.15811e-11	0.947683
	16.45	0	1.13036e-11	0.947571
	16.46	0	1.10333e-11	0.947459
	16.47	0	1.07701e-11	0.947347
	16.48	0	1.05137e-11	0.947235
	16.49	0	1.0264e-11	0.947123
	16.5	0	1.00207e-11	0.947011
	16.51	0	9.78373e-12	0.946899
	16.52	0	9.55285e-12	0.946787
	16.53	0	9.32792e-12	0.946675
	16.54	0	9.10875e-12	0.946563
	16.55	0	8.89521e-12	0.946451
	16.56	0	8.68712e-12	0.946339
	16.57	0	8.48434e-12	0.946227
	16.58	0	8.28673e-12	0.946115
	16.59	0	8.09414e-12	0.946002
	16.6	0	7.90643e-12	0.94589
	16.61	0	7.72347e-12	0.945778
	16.62	0	7.54513e-12	0.945666
	16.63	0	7.37129e-12	0.945554
	16.64	0	7.20181e-12	0.945441
	16.65	0	7.03659e-12	0.945329
	16.66	0	6.87551e-12	0.945217
	16.67	0	6.71845e-12	0.945105
	16.68	0	6.56531e-12	0.944992
	16.69	0	6.41598e-12	0.94488
	16.7	0	6.27036e-12	0.944768
	16.71	0	6.12834e-12	0.944655
	16.72	0	5.98984e-12	0.944543
	16.73	0	5.85475e-12	0.94443
	16.74	0	5.72299e-12	0.944318
	16.75	0	5.59446e-12	0.944205
	16.76	0	5.46909e-12	0.944093
	16.77	0	5.34678e-12	0.94398
	16.78	0	5.22745e-12	0.943868
	16.79	0	5.11103e-12	0.943755
	16.8	0	4.99744e-12	0.943643
	16.81	0	4.88661e-12	0.94353
	16.82	0	4.77845e-12	0.943418
	16.83	0	4.67291e-12	0.943305
	16.84	0	4.56991e-12	0.943192
	16.85	0	4.46938e-12	0.94308
	16.86	0	4.37127e-12	0.942967
	16.87	0	4.2755e-12	0.942854
	16.88	0	4.18203e-12	0.942742
	16.89	0	4.09077e-12	0.942629
	16.9	0	4.00169e-12	0.942516
	16.91	0	3.91472e-12	0.942403
	16.92	0	3.82981e-12	0.942291
	16.93	0	3.74691e-12	0.942178
	16.94	0	3.66596e-12	0.942065
	16.95	0	3.58691e-12	0.941952
	16.96	0	3.50972e-12	0.94184
	16.97	0	3.43433e-12	0.941727
	16.98	0	3.36071e-12	0.941614
	16.99	0	3.2888e-12	0.941501
	17	0	3.21857e-12	0.941388
