# Supplementary material for: In vivo study of gene expression with an enhanced dual-color fluorescent transcriptional timer
Source: eLife. 2019 May 29;8:e46181. doi: 10.7554/eLife.46181 (PMC6660218; doi:10.7554/eLife.46181)
Supplement: Figure 4—figure supplement 2—source data 1. [file elife-46181-fig4-figsupp2-data1.xlsx]

## Sheet: Sheet1
	Time (min)	dGFP	RFP
	0	0.954	0.961
	6	0.969	0.967
	12	0.998	0.973
	18	0.982	0.987
	24	0.984	0.987
	30	0.972	0.981
	36	0.967	0.981
	42	0.98	0.983
	48	0.986	0.975
	54	0.974	0.982
	60	0.982	0.981
	66	0.972	0.97
	72	0.948	0.999
	78	0.921	0.998
	84	0.924	0.987
	90	0.905	0.995
	96	0.942	0.983
	102	0.975	0.992
	108	0.999	0.982
	114	0.993	0.972
	120	0.973	0.973
	126	0.986	0.977
	132	0.962	0.99
	138	0.963	0.987
	144	0.966	0.994
	150	0.948	0.985
	156	0.944	0.983
	162	0.929	0.981
	168	0.922	0.974
	174	0.939	0.975
	180	0.91	0.975
	186	0.911	0.979
	192	0.982	0.978
	198	0.99	0.971
	204	0.97	0.974
	210	0.982	0.966
	216	0.972	0.973
	222	0.976	0.958
	228	0.967	0.95
	234	0.919	0.969
	240	0.929	0.966
	246	0.908	0.969
	252	0.903	0.965
	258	0.906	0.96
	264	0.889	0.958
	270	0.892	0.948
	276	0.98	0.949
	282	0.979	0.959
	288	0.971	0.962
	294	0.979	0.957
	300	0.958	0.961
	306	0.943	0.961
	312	0.914	0.948
	318	0.9	0.953
	324	0.888	0.935
	330	0.887	0.938
	336	0.878	0.93
	342	0.891	0.938
	348	0.853	0.934
	354	0.864	0.949
