# Supplementary material for: In vivo study of gene expression with an enhanced dual-color fluorescent transcriptional timer
Source: eLife. 2019 May 29;8:e46181. doi: 10.7554/eLife.46181 (PMC6660218; doi:10.7554/eLife.46181)
Supplement: Figure 7—source data 1. [file elife-46181-fig7-data1.xlsx]

## Sheet: Sheet1
	esg+ Cell Num.
		Control	Tsp42Ea-i	CG30159-i
	sample 1	17	11	7
	sample 2	14	16	4
	sample 3	7	9	5
	sample 4	12	15	4
	sample 5	10	7	6
	sample 6	14	10	5
	sample 7	10	14	2
	sample 8	9	10	4
	sample 9	15	16	3
	sample 10	10	13	1
	sample 11	9	15	4
	sample 12	10	13	5
	sample 13	13	11	1
	sample 14	7	10	4
	sample 15	18	15	5
	sample 16	13	12	2
	sample 17	14	19	4
	sample 18	12	11
	sample 19	13
	sample 20	9
