# Supplementary material for: In vivo study of gene expression with an enhanced dual-color fluorescent transcriptional timer
Source: eLife journal article supplement (doi:10.7554/elife.46181), 2019-05-29
Supplement: supp [file elife-46181-supp-v1.zip]

Figure 1-figure Supplement 1

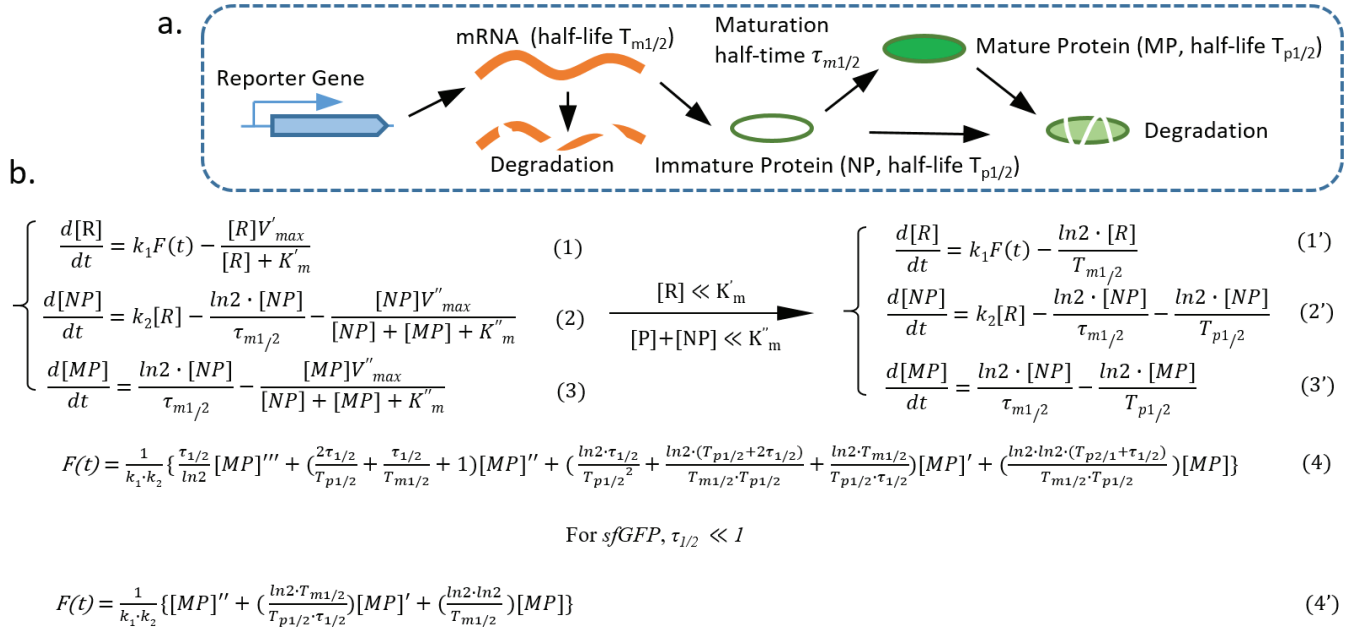

**c.**

| Parameter     | Description                                      | Dimension  | Default Value |
|---------------|--------------------------------------------------|------------|---------------|
| $R$           | mRNA concentration                               | $nMh^{-1}$ | 0             |
| $NP$          | Immature protein concentration                   | $nMh^{-1}$ | 0             |
| $MP$          | Mature protein concentration                     | $nMh^{-1}$ | 0             |
| $T_{m1/2}$    | mRNA half-life                                   | h          | 0.5           |
| $T_{p1/2}$    | Protein half-life                                | h          | 1~20          |
| $\tau_{m1/2}$ | Maturation half-time                             | h          | 0.2~2         |
| $k_1$         | Transcriptional efficiency                       | $h^{-1}$   | 1             |
| $k_2$         | Translational efficiency                         | $h^{-1}$   | 1             |
| $F(t)$        | Promoter activity                                | nM         | -             |
| $K'_m$        | Michaelis-Menten constant of mRNA degradation    | nM         | -             |
| $K''_m$       | Michaelis-Menten constant of protein degradation | nM         | -             |
| $V'_{max}$    | Maximal rate of the mRNA degradation             | $nMh^{-1}$ | -             |
| $V''_{max}$   | Maximal rate of the protein degradation          | $nMh^{-1}$ | -             |
