# Supplementary material for: In vivo study of gene expression with an enhanced dual-color fluorescent transcriptional timer
Source: eLife journal article supplement (doi:10.7554/elife.46181), 2019-05-29
Supplement: supp [file elife-46181-supp-v1.zip]

Figure 7-figure supplement 1.

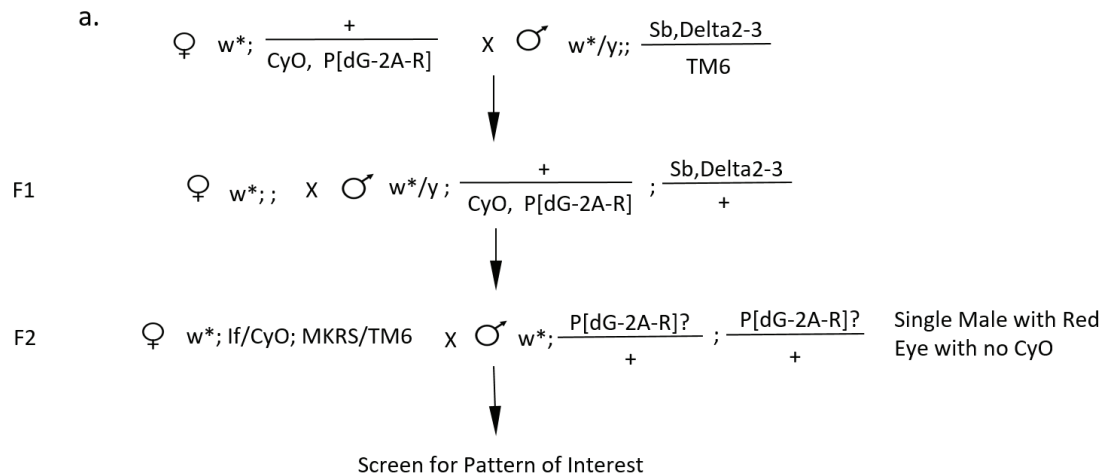

b.

| Gene Name              | FBgn Number              | Gene Description                                                             | Tissue Detected             |
|------------------------|--------------------------|------------------------------------------------------------------------------|-----------------------------|
| <b>Atg18b/CG8677</b>   | FBgn0032935/ FBgn0026577 | Phosphatidylinositol-3,5-bisphosphate binding, autophagosome assembly /DNA   | Larval Brain                |
| <b>CaM</b>             | FBgn0000253              | Remodeling and spacing factor                                                | Adult Midgut                |
| <b>CG10738/CG10133</b> | FBgn0036368/ FBgn0036366 | EF-Hand calcium-binding protein                                              | Larval Brain                |
| <b>CG32795</b>         | FBgn0040384              | Adenylyl cyclase, guanylyl cyclase/Phospholipase A2                          | Larval Brain                |
| <b>CG6650/endos</b>    | FBgn0036402/ FBgn0061515 | TMPIT-like, defense response to Gram-negative bacterium                      | Imaginal Disc, Larval Brain |
| <b>CrebA</b>           | FBgn0004396              | Glucokinase/Protein phosphatase inhibitor                                    | Adult Midgut                |
| <b>DopEcR</b>          | FBgn0035538              | cAMP response element binding (CREB) protein                                 | Larval Brain                |
| <b>Emc</b>             | FBgn0000575              | G protein-coupled receptor                                                   | Imaginal Disc               |
| <b>Gαo</b>             | FBgn0001122              | Myc-type, transcription corepressor                                          | Larval Brain                |
| <b>Inx2</b>            | FBgn0027108              | Gap junction channel                                                         | Larval Brain                |
| <b>Lbk/CG10731</b>     | FBgn0034083/ FBgn0034081 | Immunoglobulin subtype 2/ATP synthase subunit s                              | Imaginal Disc               |
| <b>Lk6</b>             | FBgn0017581              | Serine-threonine specificity protein kinase                                  | Adult Midgut                |
| <b>Qsm</b>             | FBgn0028622              | Zona pellucida domain protein                                                | Larval Brain                |
| <b>Schizo/CG10581</b>  | FBgn0028622              | Guanyl-nucleotide exchange factor/Tumor associated nucleoside-triphosphatase | Adult Midgut                |
| <b>Sd</b>              | FBgn0003345              | Transcription factor of hippo pathway                                        | Imaginal Disc               |
| <b>Tsp42Ea/CG30159</b> | FBgn0029508/ FBgn0050159 | Tetraspanin, Peripherin /An unknown secreted ligand                          | Adult Midgut                |
| <b>Ttk</b>             | FBgn0003870              | Transcription factor                                                         | Imaginal Disc               |
