# Supplementary material for: In vivo study of gene expression with an enhanced dual-color fluorescent transcriptional timer
Source: eLife. 2019 May 29;8:e46181. doi: 10.7554/eLife.46181 (PMC6660218; doi:10.7554/eLife.46181)
Supplement: Supplementary file 3. [file elife-46181-supp3.docx]

|  | **DAPI** | **GFP** | **RFP** | **Overlay** |
| --- | --- | --- | --- | --- |
| **1**  *Atg18bdG2AR*  */CG8677dG2AR* | 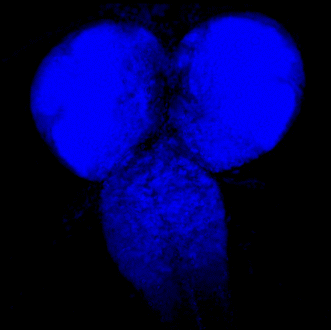 | 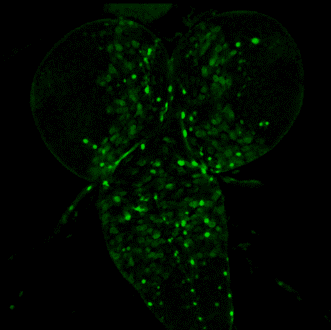 | 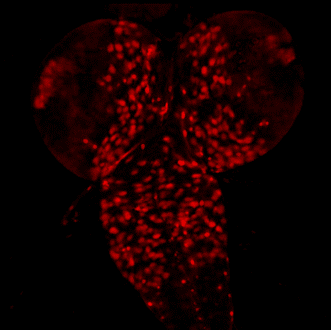 | 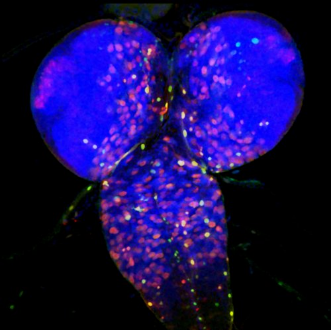 |
| **2**  *CaMdG2AR* | 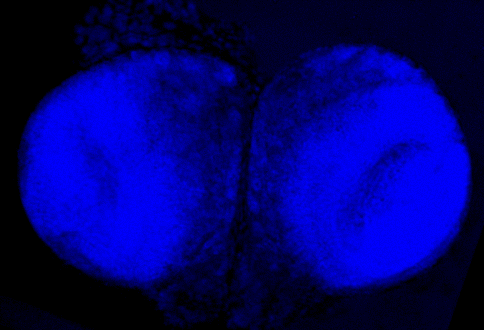 | 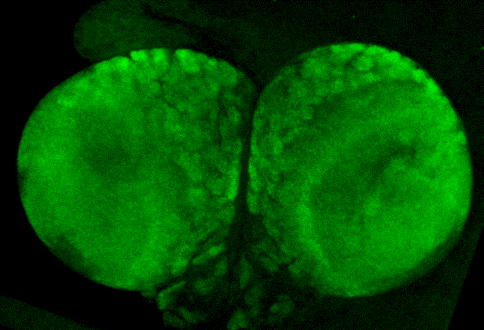 | 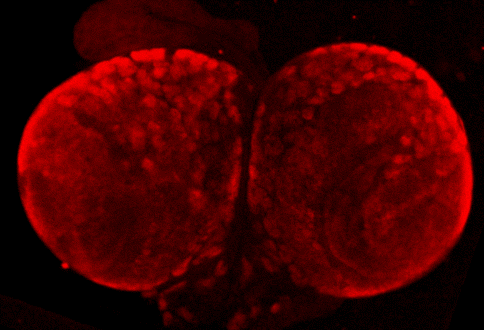 | 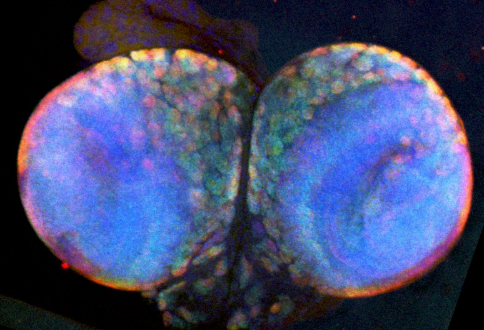 |
| **3**  *CaMdG2AR* | 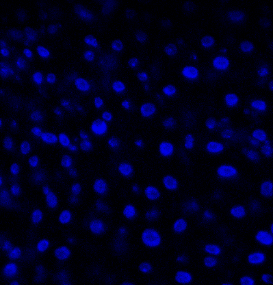 | 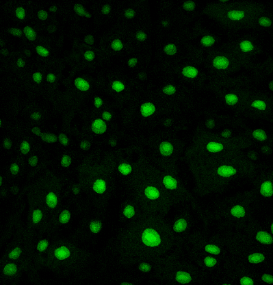 | 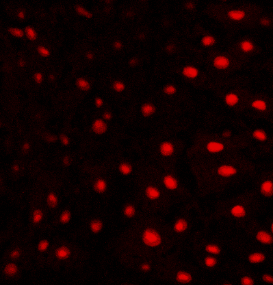 | 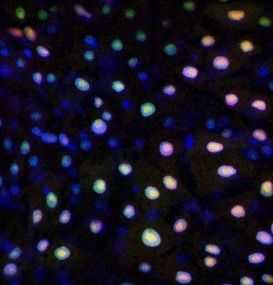 |
| **4**  *CG32795dG2AR* | 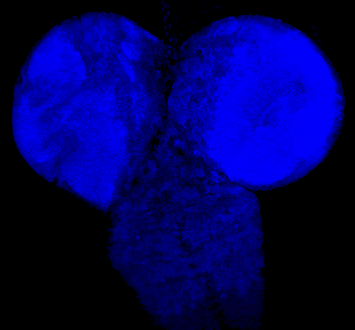 | 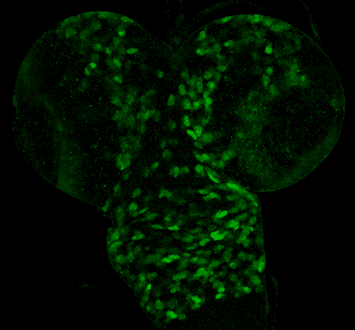 | 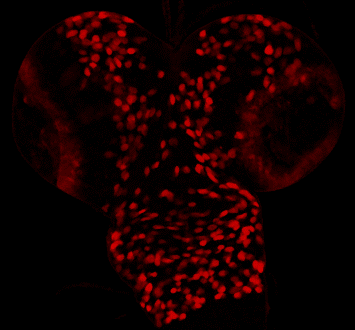 | 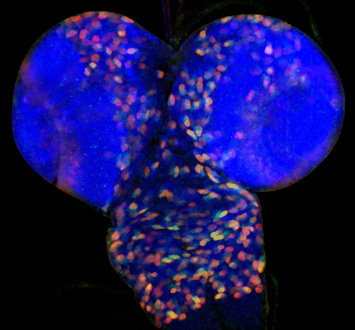 |
| **5**  *CG6650dG2AR*  */endosdG2AR* | 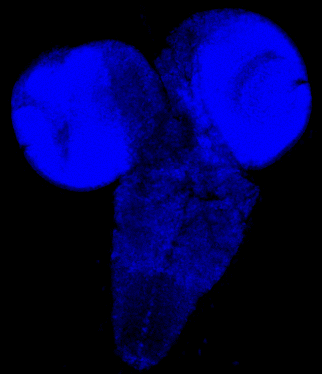 | 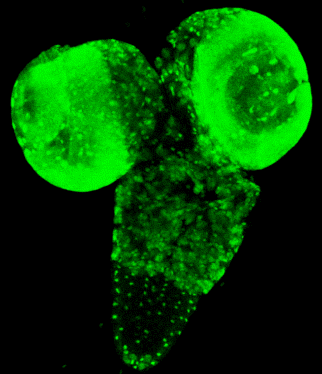 | 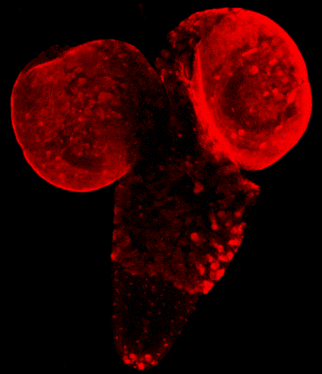 | 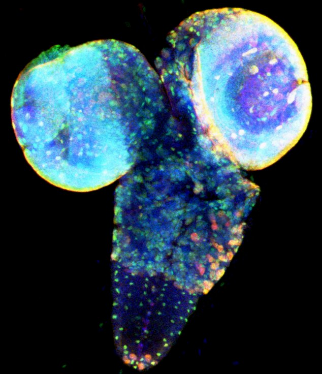 |
| **6**  *CG6650dG2AR*  */EndosdG2AR* | 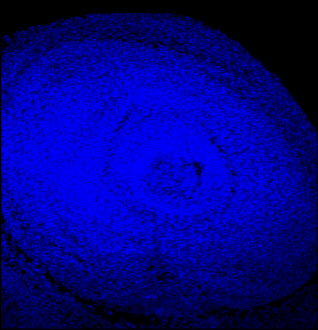 | 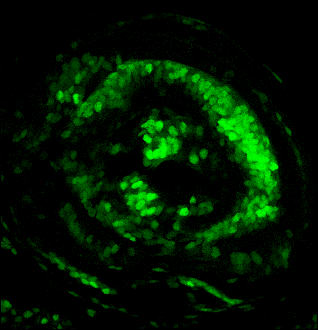 | 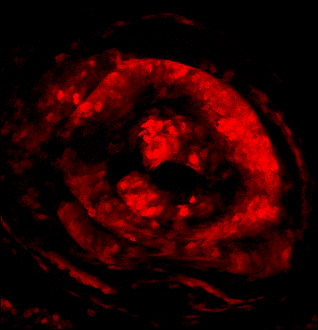 | 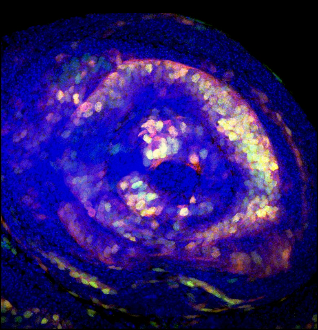 |
| **7**  *DopEcRdG2AR* | 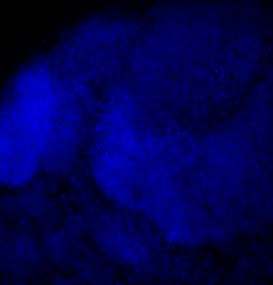 | 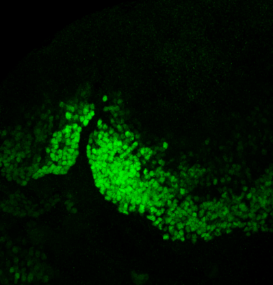 | 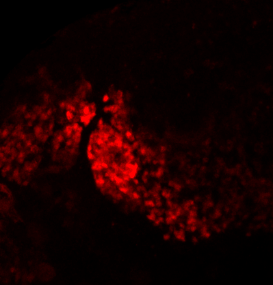 | 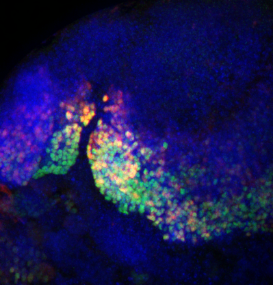 |
| **8**  *Lk6dG2AR* | 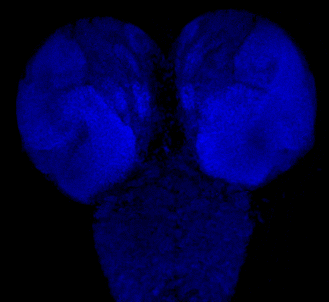 | 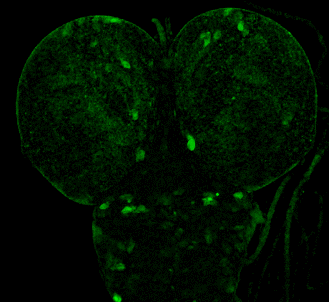 | 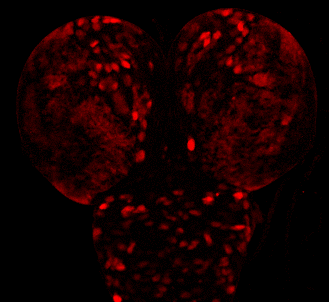 | 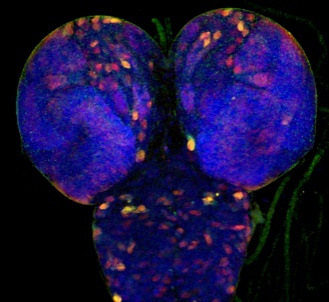 |
| **9**  *QsmdG2AR* | 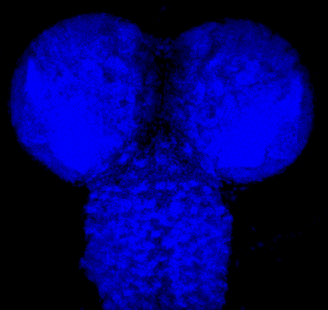 | 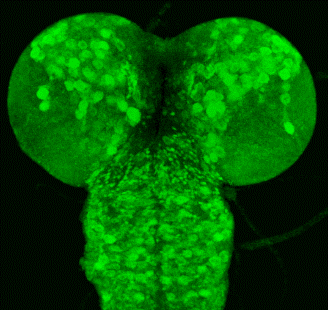 | 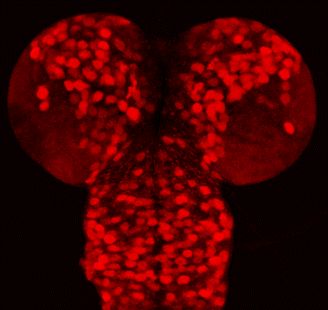 | 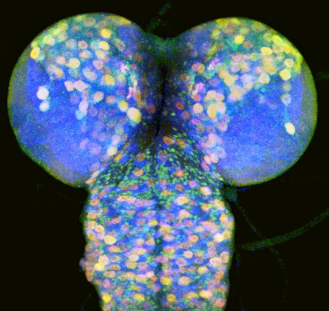 |
| **10**  ***Schi****zodG2AR* | 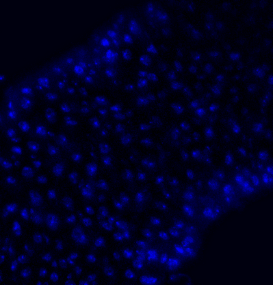 | 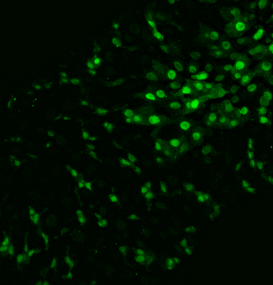 | 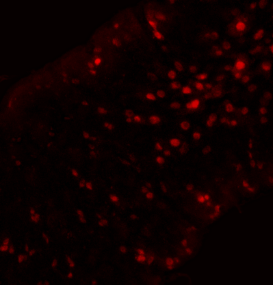 | 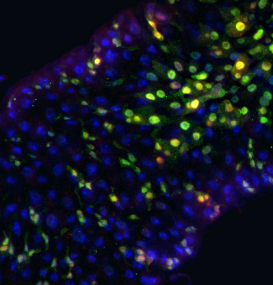 |
| **11**  *Tsp42EadG2AR/*  *CG30159dG2AR* | 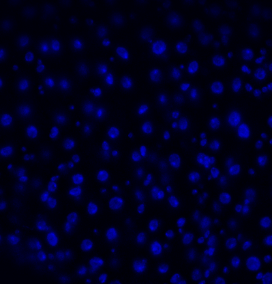 | 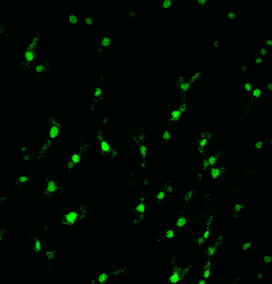 | 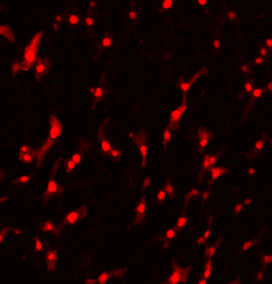 | 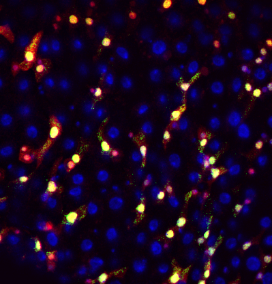 |
| **12**  *CrebAdG2AR* | 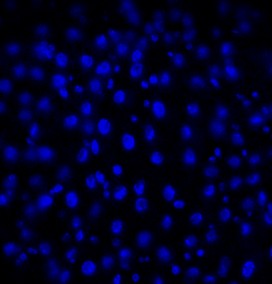 | 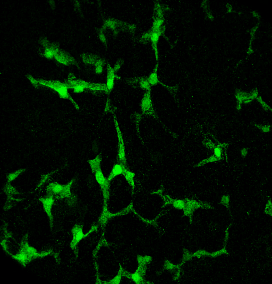 | 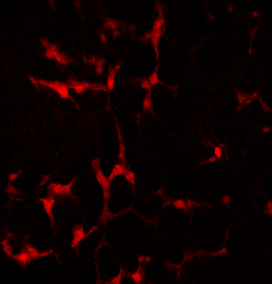 | 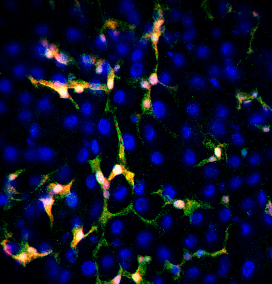 |
| **13**  *GαodG2AR* | 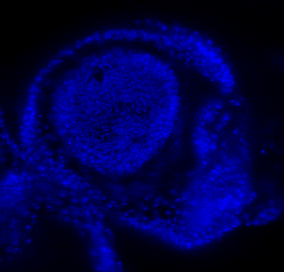 | 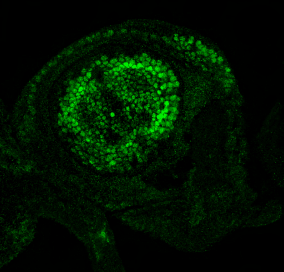 | 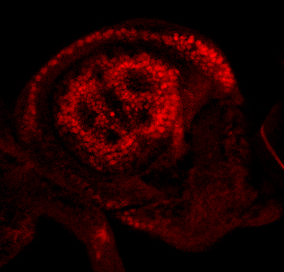 | 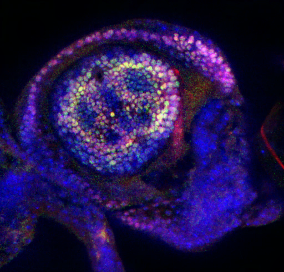 |
| **14**  *Inx2dG2AR* | 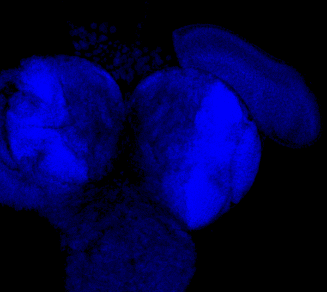 | 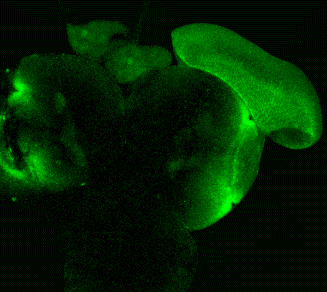 | 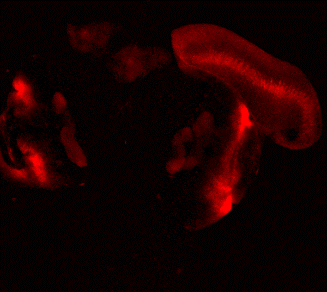 | 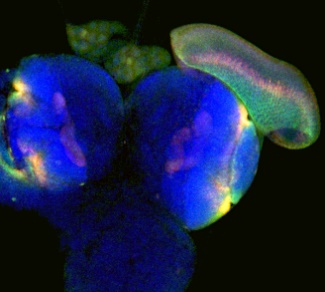 |
| **15**  *LbkdG2AR*  */CG10731dG2AR* | 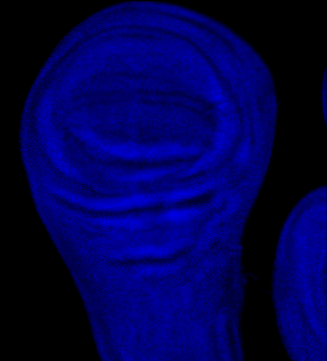 | 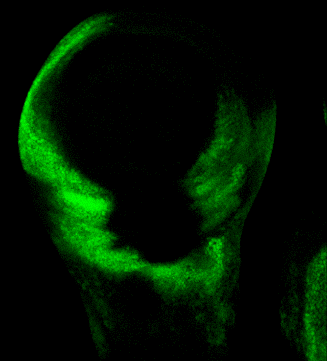 | 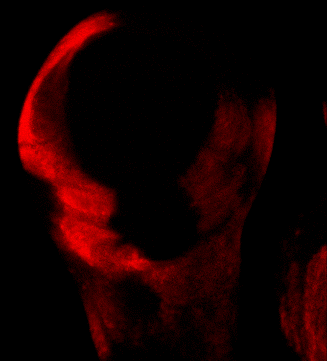 | 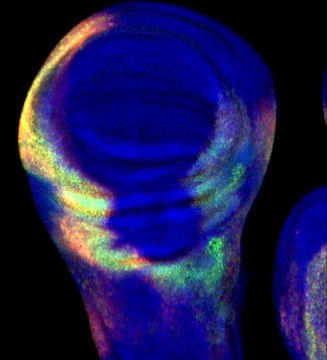 |
| **16**  *SddG2AR* | 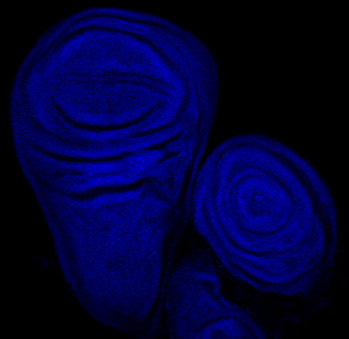 | 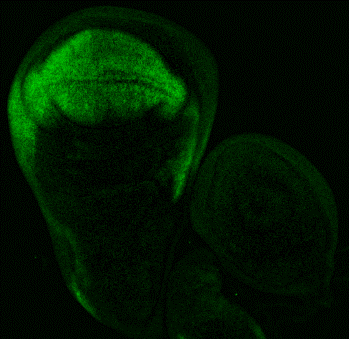 | 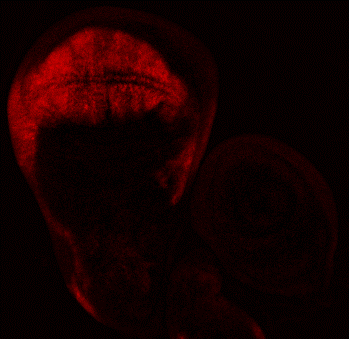 | 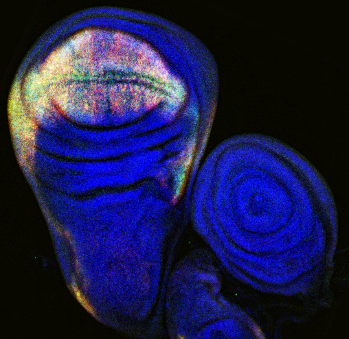 |
| **17**  *TtkdG2AR* | 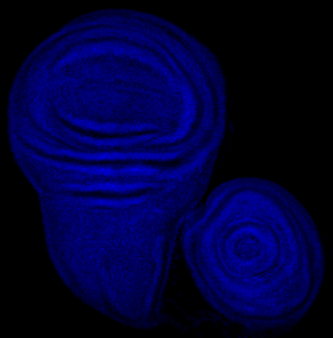 | 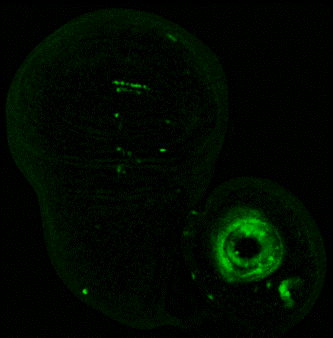 | 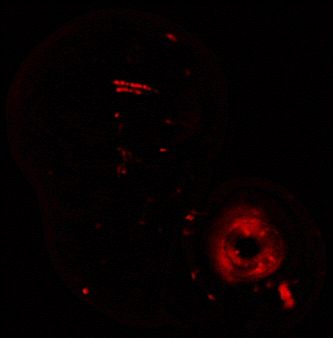 | 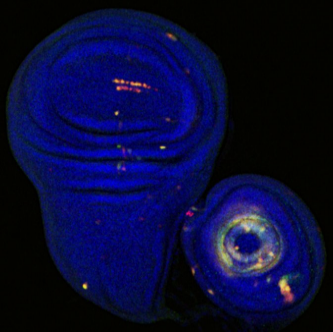 |
