# Supplementary material for: In vivo study of gene expression with an enhanced dual-color fluorescent transcriptional timer
Source: eLife. 2019 May 29;8:e46181. doi: 10.7554/eLife.46181 (PMC6660218; doi:10.7554/eLife.46181)
Supplement: Supplementary file 6. [file elife-46181-supp6.xlsx]

## Sheet: Li et al. 
Reagent type. Duplicate rows as needed. Order is flexible, but row titles must be preserved. Species (mandatory if applicable). Append in parentheses. First mention, use full genus. Sex (if applicable). Add within parentheses after species.	Designation. Symbol/name used in publication. Separate multiple entries with semi-colon, space. (If semi-colon within designation, delimit wtith double quotes.)	Source (public). Stock center, company, data repository. Reference. Include PMID or DOI; use “this paper” if new. If neither applies enter “other” and explain in Additional Information.	Identifiers. Format as ID_source:identifier. Separate multiple entries with semi-colon, space. Include catalog numbers, stock numbers, database IDs or accession numbers, RRIDs.	Additional information. Mandatory if column C entry is “this paper” or “other”. Description of new reagent; laboratory from which reagent obtained; other pertinent information. For antibodies, indicate dilution and conditions used.
Key Resources Table
Reagent type (species) or resource	Designation	Source or reference	Identifiers	Additional information
genetic reagent (D. melanogaster)	Dl-RNAi	Vienna Drosophila Resource Center	VDRC:v37287; FLYB:FBtp0030159;	FlyBase symbol: P{GD2642}
genetic reagent (D. melanogaster)	Tsp42Ea-RNAi	Bloomington Drosophila Stock Center	BDSC:39044; FLYB:FBti0149706; RRID:BDSC_39044;	FlyBase symbol: P{TRiP.HMS01964}attP40
genetic reagent (D. melanogaster)	Dome-RNAi	Bloomington Drosophila Stock Center	BDSC:32860; FLYB:FBtp0064911; RRID:BDSC_32860;	FlyBase symbol: P{TRiP.HMS00647}
genetic reagent (D. melanogaster)	CG30159-RNAi	Bloomington Drosophila Stock Center	BDSC:61888; FLYB:FBti0179550; RRID:BDSC_61888	FlyBase symbol: P{TRiP.HMJ23380}attP40
genetic reagent (D. melanogaster)	Delta2-3(99B)	Bloomington Drosophila Stock Center	BDSC:3629; FLYB:FBti0000124; RRID:BDSC_3629;	FlyBase symbol: P{Δ2-3}99B
genetic reagent (D. melanogaster)	anchor-Gal4	Bloomington Drosophila Stock Center	BDSC:66861; FLYB:FBti0185416; RRID:BDSC_66861	FlyBase symbol: Mi{Trojan-GAL4.2}anchorMI05468-TG4.2
genetic reagent (D. melanogaster)	Per-Gal4	Bloomington Drosophila Stock Center	BDSC:7127; FLYB:FBti0017918; RRID:RRID:BDSC_7127	FlyBase symbol: P{GAL4-per.BS}3
genetic reagent (D. melanogaster)	ZnT41F-Gal4	Bloomington Drosophila Stock Center	BDSC:66859; FLYB:FBti0185388; RRID:BDSC_66859	FlyBase symbol: Mi{Trojan-GAL4.2}ZnT41FMI04971-TG4.2
genetic reagent (D. melanogaster)	Trx-Gal4	Bloomington Drosophila Stock Center	BDSC:40367; FLYB:FBti0138926; RRID:BDSC_40367	FlyBase symbol: P{GMR83F09-GAL4}attP2
genetic reagent (D. melanogaster)	tutl-Gal4	Bloomington Drosophila Stock Center	BDSC:66824; FLYB:FBti0185392; RRID:BDSC_66824	FlyBase symbol: Mi{Trojan-GAL4.1}tutlMI00290-TG4.1
genetic reagent (D. melanogaster)	Plc21C-Gal4	Bloomington Drosophila Stock Center	BDSC:76142; FLYB:FBti0187513; RRID:BDSC_76142	FlyBase symbol: Mi{Trojan-GAL4.0}Plc21CMI01911-TG4.0
genetic reagent (D. melanogaster)	Ogre-Gal4	Bloomington Drosophila Stock Center	BDSC:49340; FLYB:FBti0134594; RRID:BDSC_49340	FlyBase symbol: P{GMR29C07-GAL4}attP2
genetic reagent (D. melanogaster)	Rho-Gal4	Bloomington Drosophila Stock Center	BDSC:45254; FLYB:FBti0135404; RRID:BDSC_45254	FlyBase symbol: P{GAL4-nos.NGT}
genetic reagent (D. melanogaster)	Gcm-gal4	Bloomington Drosophila Stock Center	BDSC:35541; FLYB:FBti0076768; RRID:BDSC_35541	FlyBase symbol: P{GawB}gcm[rA87.C]
genetic reagent (D. melanogaster)	dMyc-Gal4	Bloomington Drosophila Stock Center	BDSC:47844; FLYB:FBti0132910; RRID:BDSC_47844	FlyBase symbol: P{GMR10G10-GAL4}attP2
genetic reagent (D. melanogaster)	Hh-Gal4	Bloomington Drosophila Stock Center	BDSC:49437; FLYB:FBti0134463; RRID:BDSC_49437	FlyBase symbol: P{GMR27G12-GAL4}attP2
genetic reagent (D. melanogaster)	Antp-Gal4	Bloomington Drosophila Stock Center	BDSC:26817; FLYB:FBti0114895; RRID:BDSC_26817	FlyBase symbol: P{GAL4-Antp.P1.A}1
genetic reagent (D. melanogaster)	Act5C-Gal4	Bloomington Drosophila Stock Center	BDSC:4414; FLYB:FBtp0001406; RRID:BDSC_4414	FlyBase symbol: P{Act5C-GAL4}
genetic reagent (D. melanogaster)	zip-Gal4	Bloomington Drosophila Stock Center	BDSC:48187; FLYB:FBti0136532; RRID:BDSC_48187	FlyBase symbol: P{GMR51F08-GAL4}attP2
genetic reagent (D. melanogaster)	dMyc-Gal4	Bloomington Drosophila Stock Center	BDSC:47844; FLYB:FBti0132910; RRID:BDSC_47844	FlyBase symbol: P{GMR10G10-GAL4}attP2
genetic reagent (D. melanogaster)	piezo-Gal4 (II)	Bloomington Drosophila Stock Center	BDSC:58771; FLYB:FBti0164865; RRID:BDSC_58771	FlyBase symbol: P{Piezo-GAL4.1.0}IIA
genetic reagent (D. melanogaster)	piezo-Gal4 (III)	Bloomington Drosophila Stock Center	BDSC:59266; FLYB:FBti0166812; RRID:BDSC_59266	FlyBase symbol: P{Piezo-GAL4.1.0}III
genetic reagent (D. melanogaster)	ppk-Gal4 (II)	Bloomington Drosophila Stock Center	BDSC:32078; FLYB:FBti0127690; RRID:BDSC_32078	FlyBase symbol: P{ppk-GAL4.G}2
genetic reagent (D. melanogaster)	ppk-Gal4 (III)	Bloomington Drosophila Stock Center	BDSC:32079; FLYB:FBti0131208; RRID:BDSC_32079	FlyBase symbol: P{ppk-GAL4.G}3
genetic reagent (D. melanogaster)	igl-Gal4	Bloomington Drosophila Stock Center	BDSC:76744; FLYB:FBti0195474; RRID:BDSC_76744	FlyBase symbol: Mi{Trojan-GAL4.1}iglMI12785-TG4.1
genetic reagent (D. melanogaster)	Mip-Gal4	Bloomington Drosophila Stock Center	BDSC:51984; FLYB:FBti0154848; RRID:BDSC_51984	FlyBase symbol: P{Mip-GAL4.TH}2M
genetic reagent (D. melanogaster)	fz-Gal4	Bloomington Drosophila Stock Center	BDSC:66817; FLYB:FBti0185412; RRID:BDSC_66817	FlyBase symbol: Mi{Trojan-GAL4.0}fzMI12643-TG4.0
genetic reagent (D. melanogaster)	Ubi-Gal4	Bloomington Drosophila Stock Center	BDSC:32551; FLYB:FBti0131609; RRID:BDSC_32551	FlyBase symbol: P{Ubi-GAL4.U}2
genetic reagent (D. melanogaster)	MESK2-Gal4	Bloomington Drosophila Stock Center	BDSC:67434; FLYB:FBti0186339; RRID:BDSC_67434	FlyBase symbol: Mi{Trojan-GAL4.2}MESK2[MI01548-TG4.2]
genetic reagent (D. melanogaster)	CG34347-Gal4	Bloomington Drosophila Stock Center	BDSC:76674; FLYB:FBti0195405; RRID:BDSC_76674	FlyBase symbol: Mi{Trojan-GAL4.0}CG34347MI05743-TG4.0
genetic reagent (D. melanogaster)	CG7744-Gal4	Bloomington Drosophila Stock Center	BDSC:76662; FLYB:FBti0195393; RRID:BDSC_76662	FlyBase symbol: Mi{Trojan-GAL4.2}CG7744[MI04719-TG4.2]
genetic reagent (D. melanogaster)	CG2082-Gal4	Bloomington Drosophila Stock Center	BDSC:76181; FLYB:FBti0187551; RRID:BDSC_76181	FlyBase symbol: Mi{Trojan-GAL4.0}CG2082[MI06537-TG4.0]
genetic reagent (D. melanogaster)	CG40006-Gal4	Bloomington Drosophila Stock Center	BDSC:76214; FLYB:FBti0187584; RRID:BDSC_76214	FlyBase symbol: Mi{Trojan-GAL4.1}CG40006MI11466-TG4.1
genetic reagent (D. melanogaster)	CG7510-Gal4	Bloomington Drosophila Stock Center	BDSC:66861; FLYB:FBti0185416; RRID:BDSC_66861	FlyBase symbol: Mi{Trojan-GAL4.2}anchor[MI05468-TG4.2]
genetic reagent (D. melanogaster)	CG10283-Gal4	Bloomington Drosophila Stock Center	BDSC:76152; FLYB:FBti0187523; RRID:BDSC_76152	FlyBase symbol: Mi{Trojan-GAL4.1}CG10283[MI02713-TG4.1]
genetic reagent (D. melanogaster)	CG43980-Gal4	Bloomington Drosophila Stock Center	BDSC:66863; FLYB:FBti0185383; RRID:BDSC_66863	FlyBase symbol: Mi{Trojan-GAL4.2}CG43980MI06742-TG4.2
genetic reagent (D. melanogaster)	CG15270-Gal4	Bloomington Drosophila Stock Center	BDSC:76649; FLYB:FBti0195382; RRID:BDSC_76649	FlyBase symbol: Mi{Trojan-GAL4.1}CG15270MI03816-TG4.1
genetic reagent (D. melanogaster)	CG33964-Gal4	Bloomington Drosophila Stock Center	BDSC:76742; FLYB:FBti0195472; RRID:BDSC_76742	FlyBase symbol: Mi{Trojan-GAL4.2}CG33964[MI12535-TG4.2]
genetic reagent (D. melanogaster)	CG8270-Gal4	Bloomington Drosophila Stock Center	BDSC:77741; FLYB:FBti0196205; RRID:BDSC_77741	FlyBase symbol: Mi{Trojan-GAL4.0}CG8270MI03821-TG4.0
genetic reagent (D. melanogaster)	CG8177-Gal4	Bloomington Drosophila Stock Center	BDSC:77781; FLYB:FBti0196246; RRID:BDSC_77781	FlyBase symbol: Mi{Trojan-GAL4.0}CG8177MI07482-TG4.0
genetic reagent (D. melanogaster)	CG5521-Gal4	Bloomington Drosophila Stock Center	BDSC:76180; FLYB:FBti0187550; RRID:BDSC_76180	FlyBase symbol: Mi{Trojan-GAL4.1}CG5521MI06530-TG4.1
genetic reagent (D. melanogaster)	CG4467-Gal4	Bloomington Drosophila Stock Center	BDSC:66843; FLYB:FBti0185368; RRID:BDSC_66843	FlyBase symbol: Mi{Trojan-GAL4.1}CG4467MI09204-TG4.1
genetic reagent (D. melanogaster)	CG34347-Gal4	Bloomington Drosophila Stock Center	BDSC:76674; FLYB:FBti0195405; RRID:BDSC_76674	FlyBase symbol: Mi{Trojan-GAL4.0}CG34347MI05743-TG4.0
genetic reagent (D. melanogaster)	CG43980-Gal4	Bloomington Drosophila Stock Center	BDSC:66863; FLYB:FBti0185383; RRID:BDSC_66863	FlyBase symbol: Mi{Trojan-GAL4.2}CG43980MI06742-TG4.2
genetic reagent (D. melanogaster)	CG13175-Gal4	Bloomington Drosophila Stock Center	BDSC:76742; FLYB:FBti0195472; RRID:BDSC_76742	FlyBase symbol: Mi{Trojan-GAL4.2}CG33964MI12535-TG4.2
genetic reagent (D. melanogaster)	CG14995-Gal4	Bloomington Drosophila Stock Center	BDSC:76721; FLYB:FBti0195451; RRID:BDSC_76721	FlyBase symbol: Mi{Trojan-GAL4.0}CG14995MI10302-TG4.0
genetic reagent (D. melanogaster)	dMef2-Gal4	Bloomington Drosophila Stock Center	BDSC:27390; FLYB:FBti0115746; RRID:BDSC_27390	FlyBase symbol: P{GAL4-Mef2.R}3
genetic reagent (D. melanogaster)	NP1176-Gal4	Kyoto Stock Center	DGRC:112553; FLYB:FBti0034248;	FlyBase symbol: P{GawB}Tsp42EaNP1176
genetic reagent (D. melanogaster)	GMR-Gal4	Lab Stock	FLYB:FBtp0018010	FlyBase symbol: P{GMR-GAL4.Y}
genetic reagent (D. melanogaster)	Da-Gal4	Lab Stock	FLYB:FBtp0089374	FlyBase symbol: P{da-GAL4.U}
genetic reagent (D. melanogaster)	tubGal4	Lab Stock	BDSC:5138; FLYB:FBtp0002651; RRID:BDSC_5138	FlyBase symbol: P{tubP-GAL4}
genetic reagent (D. melanogaster)	esg-Gal4	Lab Stock	DGRC:112304; FLYB:FBti0033872;	FlyBase symbol: P{w[+mW.hs]=GawB}NP0726
genetic reagent (D. melanogaster)	Insc-Gal4, ase-Gal80ts	Gift from Dr. Dong Yan (Y. Dong, et. al. 2014)	FLYB:FBtp0097944; and FLYB: FBtp0069451; PMID: 24576427	FlyBase symbol: P{insc-GAL4.U}, and P{ase-GAL80.N}
genetic reagent (D. melanogaster)	Dl-Gal4	Gift from Dr. Steve Hou (X. Zeng, et. al. 2011)	FLYB:FBal0256629; PMID: 20681020	FlyBase symbol: GAL4-Dl-05151-G
genetic reagent (D. melanogaster)	Su(H)Gbe-Gal4	Gift from Dr. Steve Hou (X. Zeng, et. al. 2011)	FLYB:FBtp0064384; PMID: 20681020	FlyBase symbol: GAL4-Su(H).GBE
genetic reagent (D. melanogaster)	6XSTAT::dGFP attP40	this paper		generated from pCaSpeR-gypsy-6XSTAT-HSPmini-nlsGFP-PEST-SV40-gypsy-attB
genetic reagent (D. melanogaster)	6XSTAT::edGFP attP40	this paper		generated from pCaSpeR-gypsy-6XSTAT-HSPmini-IVS-syn21-nlsGFP-PEST-p10-gypsy-attB
genetic reagent (D. melanogaster)	6XSTAT::eRFP attP40	this paper		generated from pCaSpeR-gypsy-6XSTAT-HSPmini-IVS-syn21-nlsRFP-p10-gypsy-attB
genetic reagent (D. melanogaster)	6XSTAT::eGFP attP40	this paper		generated from pCaSpeR-gypsy-6XSTAT-HSPmini-IVS-syn21-nlsGFP-p10-gypsy-attB
genetic reagent (D. melanogaster)	6XSTAT::edGFP-2A-RFP attP40	this paper		generated from pCaSpeR-6XSTAT-HSPmini-IVS-syn21-nlsGFP-PEST-2A-nlsRFP-p10-attB
genetic reagent (D. melanogaster)	Su(H)Gbe::dGFP attP40	this paper		generated from pCaSpeR-gypsy-Su(H)Gbe-HSPmini-nlsGFP-PEST-SV40-attB
genetic reagent (D. melanogaster)	Su(H)Gbe::edGFP attP40	this paper		generated from pCaSpeR-gypsy-Su(H)Gbe-HSPmini-IVS-syn21-nlsGFP-PEST-p10-gypsy-attB
genetic reagent (D. melanogaster)	Su(H)Gbe::eRFP attP40	this paper		generated from pCaSpeR-gypsy-Su(H)Gbe-HSPmini-IVS-syn21-nlsRFP-p10-gypsy-attB
genetic reagent (D. melanogaster)	Su(H)Gbe::eGFP attP40	this paper		generated from pCaSpeR-gypsy-Su(H)Gbe-HSPmini-IVS-syn21-nlsRFP-p10-gypsy-attB
genetic reagent (D. melanogaster)	Ubi::edGFP-2A-RFP attP40	this paper		generated from pUbi-IVS-syn21-nlsGFP-PEST-2A-RFP-p10 attB
genetic reagent (D. melanogaster)	pUAST-edGFP-2A-RFP attP2	this paper		generated from pUAST-IVS-syn21-nlsGFP-PEST-2A-RFP-p10 attB
genetic reagent (D. melanogaster)	P{DSP-edGFP-2A-RFP}	this paper		generated from pCaSpeR-DSP-IVS-syn21-nlsGFP-PEST-Myc-2A-nlsRFP-HA-p10
genetic reagent (D. melanogaster)	P{DSP-edGFP-2A-lexA}	this paper		generated from pCaSpeR-DSP-IVS-syn21-nlsGFP-PEST-Myc-2A-lexA-p10
cell line (D. melanogaster)	S2R+	other	FLYB:FBtc0000181; RRID:CVCL_Z831	Cell line maintained in N. Perrimon lab; FlyBase symbol: S2-DRSC.
antibody	mouse monoclonal anti-HA	Abcam	ab18181, RRID:AB_444303	(1:500)
antibody	mouse monoclonal anti-Prospero	Developmental Studies Hybridoma Bank	Prospero (MR1A)), RRID:AB_528440	(1:50)
antibody	rabbit polyclonal anti-Myc	Cell signaling	#2278, RRID:AB_490778	Rabbit polyclonal (1:250)
antibody	goat polyclonal anti-mouse IgGs conjugated to Alexa 647	ThermoFisher	# A28181, RRID:AB_2536165	(1:500)
antibody	goat polyclonal anti-mouse IgGs conjugated to Alexa 488	ThermoFisher	# A-11029, RID:AB_138404	(1:500)
antibody	IRDye® 800CW Goat polyclonal anti-Rabbit IgG	LI-COR	926-32211, RRID:AB_621843	(1:20,000 )
antibody	IRDye 680RD Goat polyclonal anti-Mouse IgG	LI-COR	926-68070, RRID:AB_10956588	(1:20,000 )
chemical compound, drug	Actinomycin D	Sigma-Aldrich‎		10 μM
chemical compound, drug	Cycloheximide	Sigma-Aldrich‎		100 μg/ml
chemical compound, drug	DAPI	Molecular Probes		(1:1000)
software, algorithm	MATLAB	MathWorks	https://www.mathworks.com/products/matlab.html
software, algorithm	Imaris	Bitplane	https://imaris.oxinst.com/
software, algorithm	ImageJ	NIH	https://imagej.nih.gov/ij/, RRID:SCR_003073
recombinant DNA reagent	pJFRC81	Addgene	3643, RRID:Addgene_3643
recombinant DNA reagent	pBPhsFlp2::PEST	Addgene	63171, RRID:Addgene_63171
recombinant DNA reagent	pLHG	Gift from Dr. Konrad Basler (R. Yagi, et. al. 2010)	PMID: 20805468
recombinant DNA reagent	pVALIUM10-roe	DRSC/TRiP Center	GenBank: GU931386.2
recombinant DNA reagent	pWALIUM10-roe	DRSC/TRiP Center
recombinant DNA reagent	pUWR	DGRC	1281
recombinant DNA reagent	pCas4B2G	Lab Stock, (M. Markstein, et. al. 2008)	PMID: 18311141
recombinant DNA reagent	pUAST4	Lab Stock
recombinant DNA reagent	pUbi-GW attB	this paper		generated from pWALIUM10-roe
recombinant DNA reagent	pUbi-GFP-Myc	this paper		generated from pUWR
recombinant DNA reagent	pUbi-GFP-Myc-PEST	this paper		generated from pUWR
recombinant DNA reagent	pUbi-nls-GFP-Myc-PEST	this paper		generated from pUWR
recombinant DNA reagent	pUbi-His2A-dGFP-Myc-PEST	this paper		generated from pUWR
recombinant DNA reagent	pUbi-mcd8-GFP-Myc-PEST	this paper		generated from pUWR
recombinant DNA reagent	pUbi-nlsRFP-HA	this paper		generated from pUWR
recombinant DNA reagent	pCaSpeR-gypsy-HSPmini-IVS-syn21-nlsGFP-PEST-p10-gypsy-attB	this paper		generated from pCas4B2G
recombinant DNA reagent	pCaSpeR-gypsy-HSPmini-IVS-syn21-nlsRFP-p10-gypsy-attB	this paper		generated from pCas4B2G
recombinant DNA reagent	pCaSepR-gypsy-HSPmini-nlsGFP-PEST-SV40-gypsin-attB	this paper		generated from pCas4B2G
recombinant DNA reagent	pCaSpeR-gypsy-HSPmini-IVS-syn21-nlsGFP-p10-gypsy-attB	this paper		generated from pCas4B2G
recombinant DNA reagent	pCaSpeR-gypsy-6XSTAT-HSPmini-IVS-syn21-nlsGFP-PEST-p10-gypsy-attB	this paper		generated from pCas4B2G
recombinant DNA reagent	pCaSpeR-gypsy-6XSTAT-HSPmini-IVS-syn21-nlsRFP-p10-gypsy-attB	this paper		generated from pCas4B2G
recombinant DNA reagent	pCaSpeR-gypsy-6XSTAT-HSPmini-IVS-syn21-nlsGFP-p10-gypsy-attB	this paper		generated from pCas4B2G
recombinant DNA reagent	pCaSepR-gypsy-6XSTAT-HSPmini-nlsGFP-PEST-SV40-gypsin-attB	this paper		generated from pCas4B2G
recombinant DNA reagent	pCaSpeR-6XSTAT-HSPmini-IVS-syn21-nlsGFP-PEST-2A-nlsRFP-p10-attB	this paper		generated from pVALIUM10
recombinant DNA reagent	pCaSepR-gypsy-Su(H)Gbe-HSPmini-nlsGFP-PEST-SV40-gypsin-attB	this paper		generated from pCas4B2G
recombinant DNA reagent	pCaSpeR-gypsy-Su(H)Gbe-HSPmini-IVS-syn21-nlsGFP-PEST-p10-gypsy-attB	this paper		generated from pCas4B2G
recombinant DNA reagent	pCaSpeR-gypsy-Su(H)Gbe-HSPmini-IVS-syn21-nlsRFP-p10-gypsy-attB	this paper		generated from pCas4B2G
recombinant DNA reagent	pCaSpeR-gypsy-Su(H)Gbe-HSPmini-IVS-syn21-nlsGFP-p10-gypsy-attB	this paper		generated from pCas4B2G
recombinant DNA reagent	pCaSepR-HSPmini-IVS-Syn21-nlsGFP-PEST-2A-nlsRFP-p10-attB	this paper		generated from pCas4B2G
recombinant DNA reagent	pUbi-IVS-syn21-nlsGFP-PEST-2A-RFP-p10 attB	this paper		generated from pUbi-GW attB
recombinant DNA reagent	pUAST-IVS-syn21-nlsGFP-PEST-2A-RFP-p10 attB	this paper		generated from pVALIUM10
recombinant DNA reagent	pCaSpeR-DSCP-IVS-syn21-nlsGFP-PEST-Myc-2A-nlsRFP-HA-p10	this paper		generated from pCas4B2G
recombinant DNA reagent	pCaSpeR-DSCP-IVS-syn21-nlsGFP-PEST-Myc-2A-lexA-p10	this paper		generated from pCas4B2G

## Sheet: Notes
Introduction
The Key Resources Table is designed to highlight the reagents and resources used in a specific study. Please include the genetically modified organisms and strains, cell lines, reagents, and software that are essential to reproduce the results presented. Note that datasets should be included in the datasets section of the submission form.
Please include a completed Key Resources Table at the start of the Materials and Methods section within your article file (this table does not need to be numbered). For consistency, please do not add subheadings to the table. Any references in the Source column should also be included in the list of references. Datasets should be entered within the datasets section of the submission form. A table…
The Key Resources Table does not need to be an exhaustive list of all the materials and resources used (e.g., essential chemicals and standard culture media do not need to be included). Please ensure that the items listed in the table are reported in the Materials and Methods section within the context of their use. We suggest that no more than ten primers and RNA sequences are included in this t…
Guidelines for creation of the Key Resources Table
Some of the constraints below are imposed to allow automated parsing of the table.
Columns (general):
(1) Column order and headings must be preserved.
(2) Columns A-E should not be removed, even if not used.
(3) Columns can be appended (F, G, etc.) for internal use.
Rows (general):
(1) Row titles (preceding the parentheses) must be preserved.
(2) Row one (column headings) should not be removed.
(3) Row 2 (headings with instructions) can be removed.
(4) Order of the rows can be changed.
(5) Clustering of multiple reagents of one type recommended, but is not mandatory.
(6) Reagent types indicated on template that are not used can be removed.
(7) Reagent types not represented in the template: use “other”.
Column A: Reagent type (mandatory)
(1) Row title (preceding parentheses) cannot be changed.
(2) See descriptions of categories in “Reagent categories” section below.
(3) If appropriate, include species within parentheses. Use full genus and full species for first mention; thereafter, initial for genus may be used.
(4) If appropriate, indicate sex after species (within the parentheses); separate by comma, space.
(5) See additional information in the section “Rows (general)” above.
Column B: Symbol/name used in publication (mandatory)
(1) This is a free-text field; there are no formatting constraints, except for separation of multiple entries by semi-colon, space.
(2) Should indicate exactly how the reagent is referred to in the publication. If several designations are used for one reagent, can include more than one entry, separated by semi-colon, space. If one designation has been used to refer to several different reagents, list each reagent separately and include a unique identifier or description parenthetically.
(3) If there is a semi-colon within the designation used, add double quotes around the entire phrase.
(4) Additional defining information can be included parenthetically (if brief).
Columns C: Source (mandatory)
(1) If reagent obtained from a public source, such as a stock center or company, list resource name.
(2) If not obtained from public source, but a published description is available, list the DOI or PMID for the publication.
(3) If reagent newly created in the publication, enter “this paper”.
(4) If none of the above, enter “other” and explain in Additional Information (Column E).
(5) If it is appropriate to indicate both a publication and a lab or researcher that provided the reagent, list the publication in this field and the lab or researcher in Additional Information.
Column D: Identifiers (not mandatory; use if possible)
(1) Use the format “ID_source:identifier” with a colon and no spaces. Separate multiple entries with a semi-colon, space.
(2) If possible, use the recommended abbreviation for the ID_source (see below).
(3) Multiple identifiers, even if redundant, are useful for validation. In some case a more general identifier (for a stock, for instance) can be combined with a more precise identifier (for the allele of interest in that stock).
(4) Inclusion of database identifiers is strongly encouraged to facilitate accurate incorporation of published data into appropriate biological databases.
Column E: Additional information
(1) Mandatory if column C entry is “this paper” or “other”. Description of new reagent or laboratory from which reagent obtained. (Free text)
(2) For antibodies, indicate dilution in parentheses (to avoid auto-formatting problems).
(3) Other pertinent information, including pointers to supplementary information or Methods section, if appropriate. (Free text)
Additional columns can be added for internal purposes (and removed prior to submission for publication): tracking acquisition by the lab, lab-specific stock numbers, storage location in the lab, comments about problems or QC, etc.
Reagent and resource categories
● Gene (indicate species) - not strictly a reagent, but unambiguous identification critical for genetic research and genetic databases.
● Strain, strain background (indicate species) - applies to whole organism; includes bacterial and virus strains or isolates. Indicate sex, if applicable.
● Genetic reagent (indicate species) - applies to mutations and variants in whole organism, including transgenically introduced constructs. For transgenic lines, indicate host species. Indicate sex, if applicable.
● Cell line (indicate species) - if a primary cell line, describe in Additional Information. Indicate sex, if applicable.
● Transfected construct (indicate species) - in cell line. Generally, indicate species of cell line; use species of construct component if that is more relevant and explain in Additional Information.
● Biological sample (indicate species) - any other biological entity, ranging from isolated tissue to defined population; describe in Additional Information. Indicate sex, if applicable.
● Antibody - include host organism common name and clonality (e.g., “mouse monoclonal”); include dilution used in Additional Information (within parentheses to avoid auto-formatting problems).
● Recombinant DNA reagent - traditional cultured clones, plasmids, cDNAs, etc., including recombinant DNA libraries.
● Sequence-based reagent - oligonucleotides, primers, morpholinos, etc.; indicate sequence.
● Peptide, recombinant protein - generally, commercially available reagents.
● Chemical compound, drug - generally, commercially available reagents.
● Commercial assay, kit - detection assays; labeling and sample preparation kits.
● Software, algorithm - newly created or previously existing.
● Other - miscellaneous other categories, including histological stains.
