# Supplementary figures and images for: In vivo study of gene expression with an enhanced dual-color fluorescent transcriptional timer
Source: eLife journal article supplement (doi:10.7554/elife.46181), 2019-05-29

Figure 4-figure supplement 1.

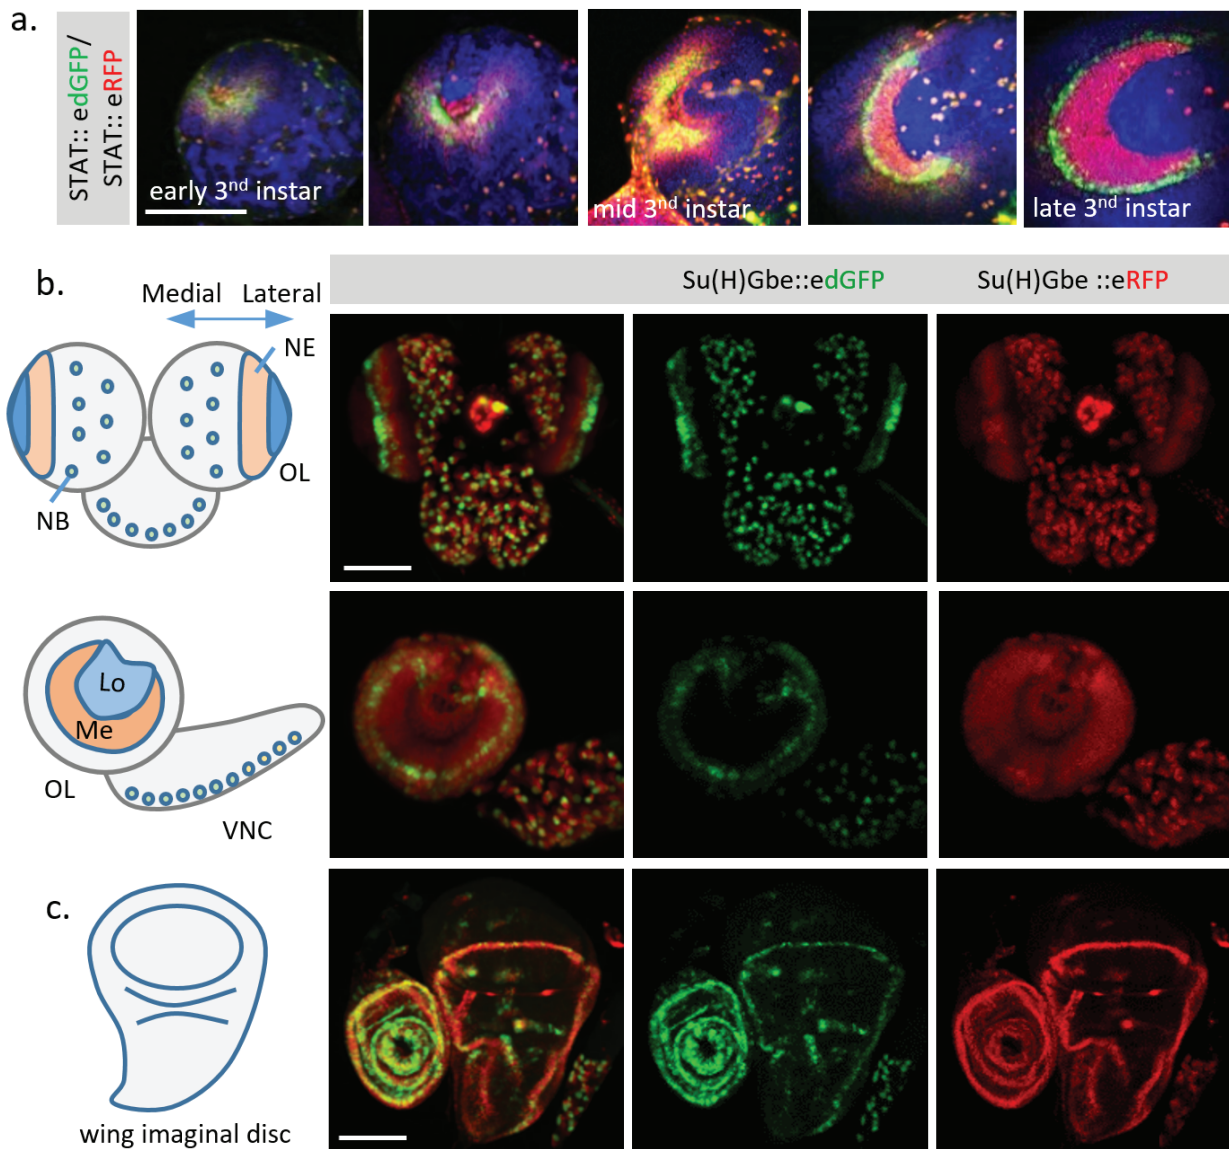

Supplement: supp [file elife-46181-supp-v1.zip]

Figure 2-figure supplement 1

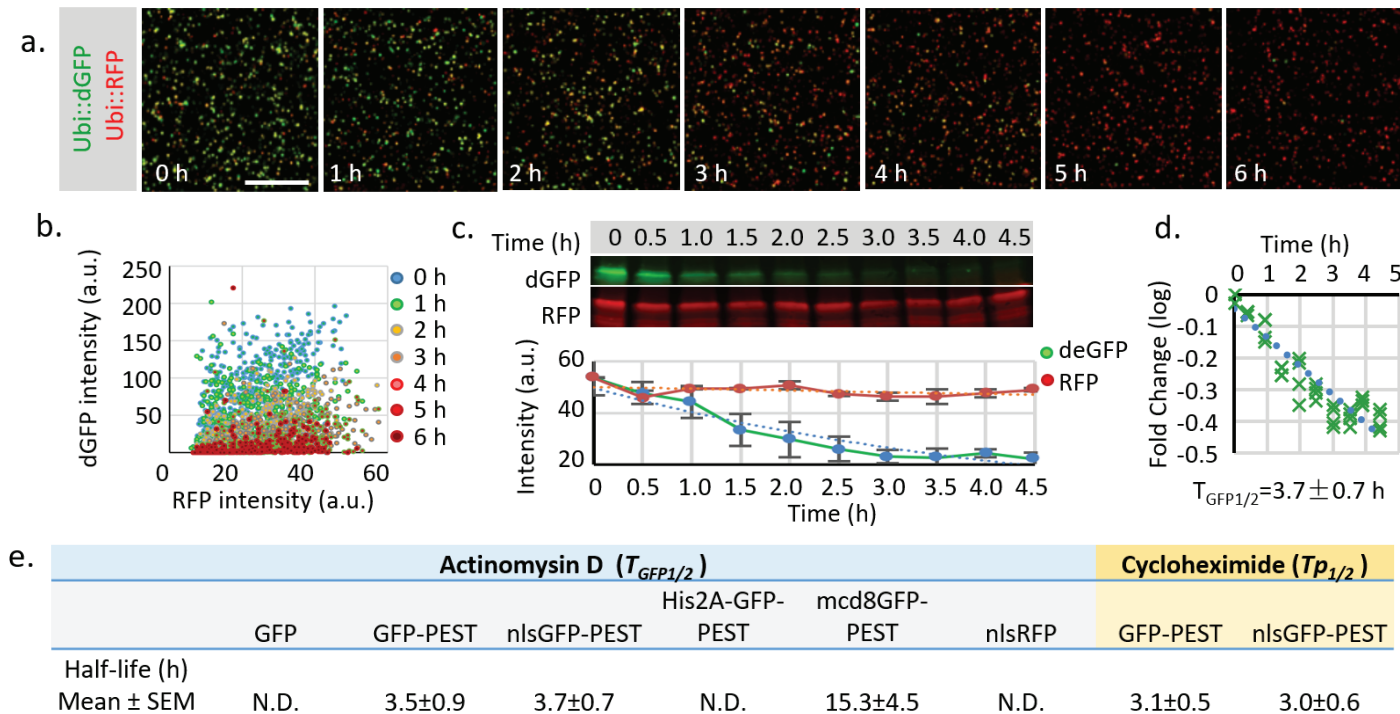

Supplement: supp [file elife-46181-supp-v1.zip]

Figure 4-figure supplement 3.

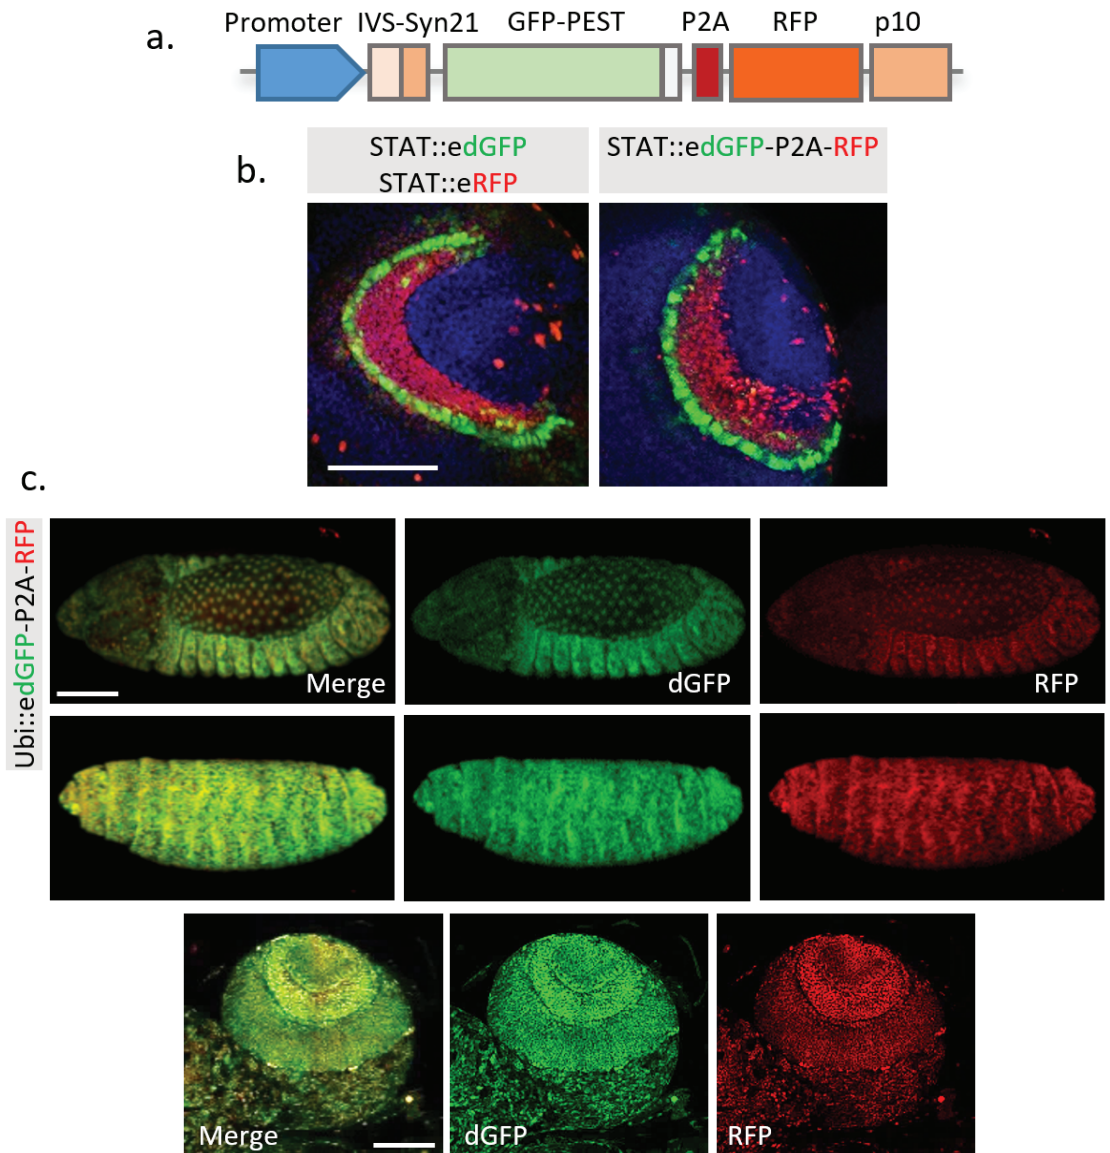

Supplement: supp [file elife-46181-supp-v1.zip]

Figure 5-figure supplement 1.

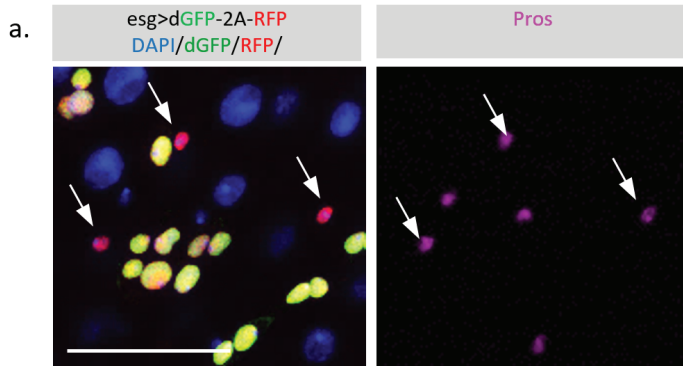

b.

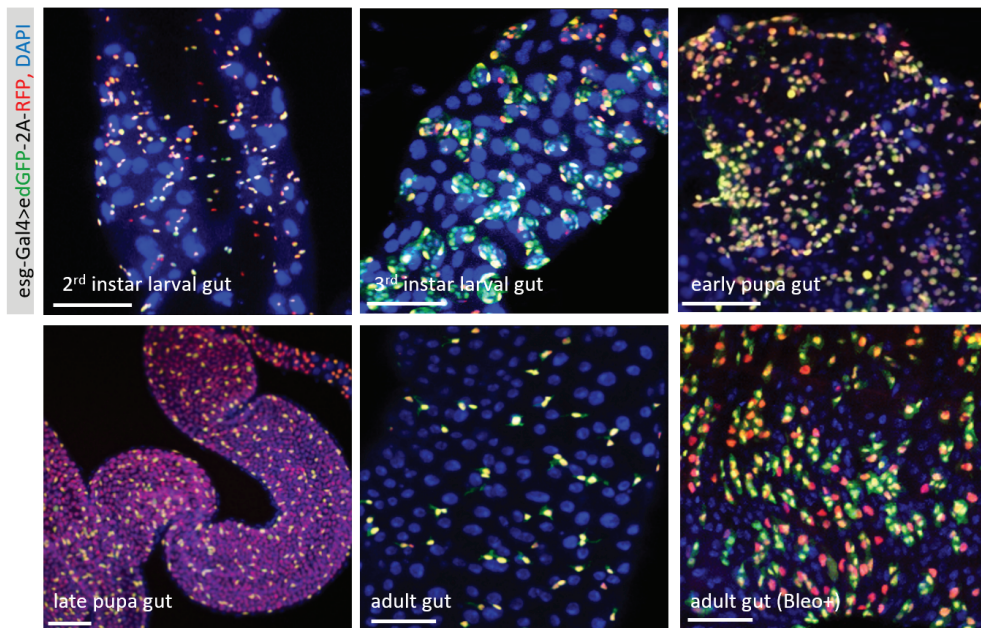

Supplement: supp [file elife-46181-supp-v1.zip]

Figure 4-figure supplement 2.

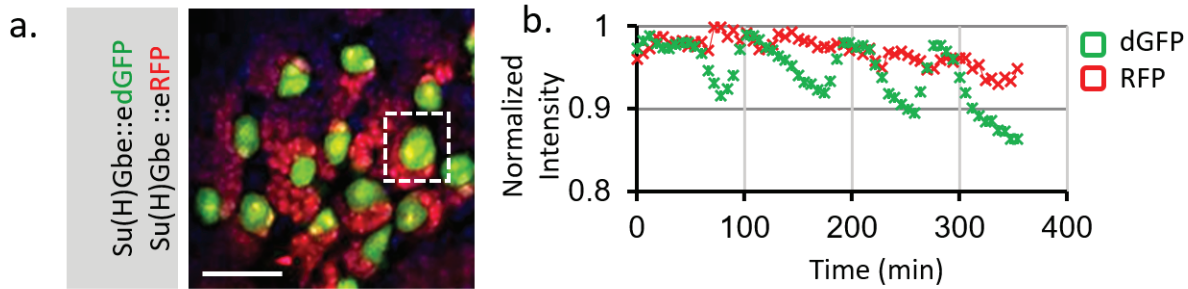

Supplement: supp [file elife-46181-supp-v1.zip]

Figure 6-figure Supplement 1

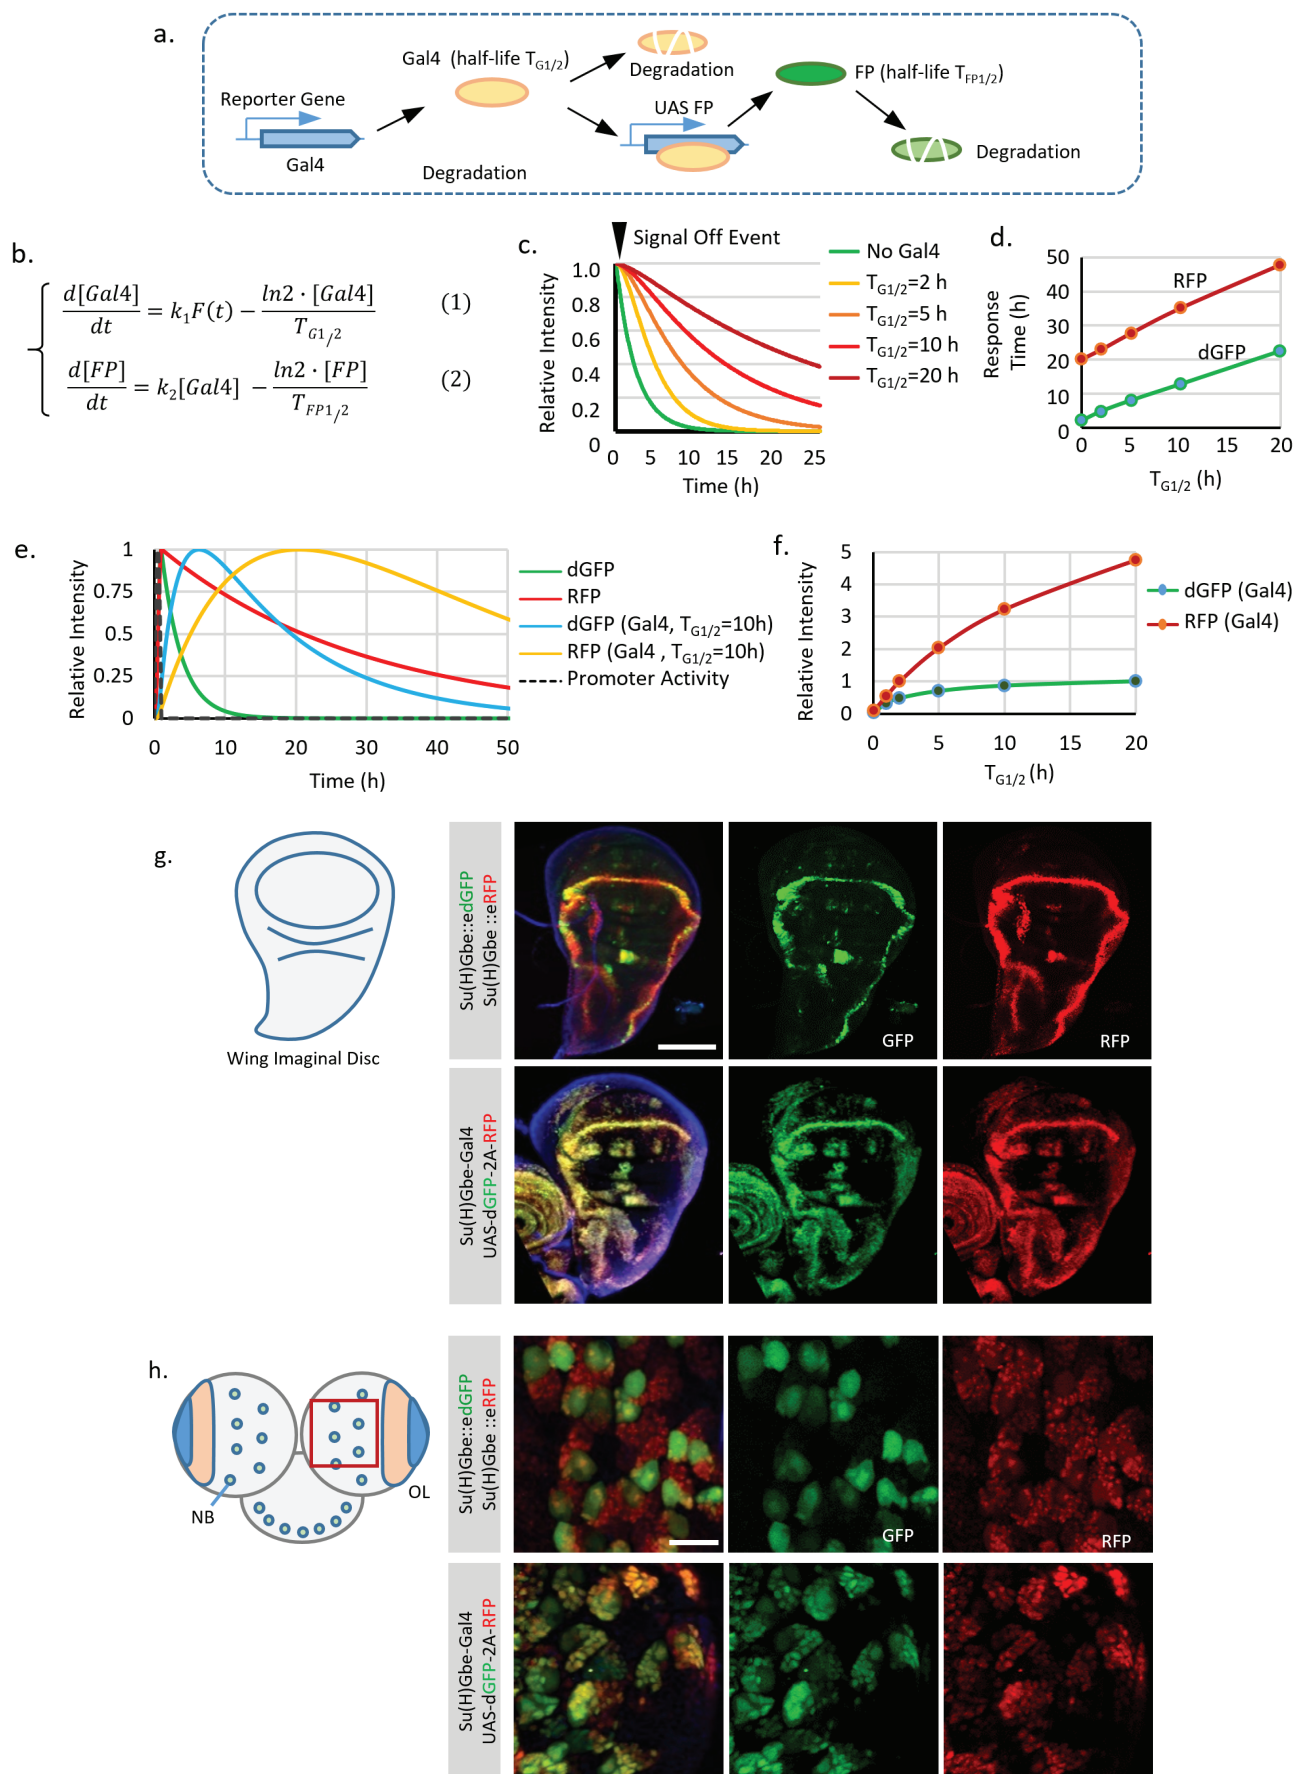

Supplement: supp [file elife-46181-supp-v1.zip]

Figure 3-figure supplement 1.

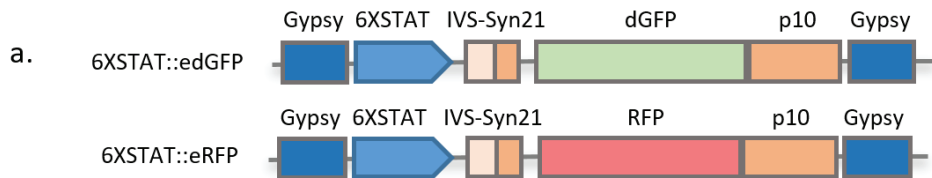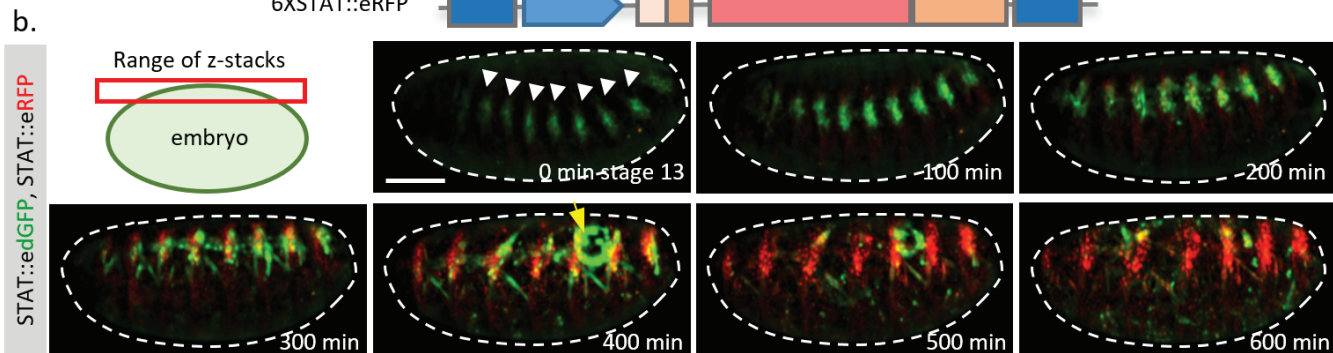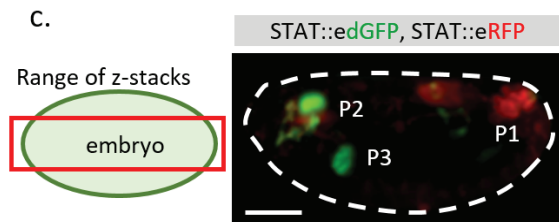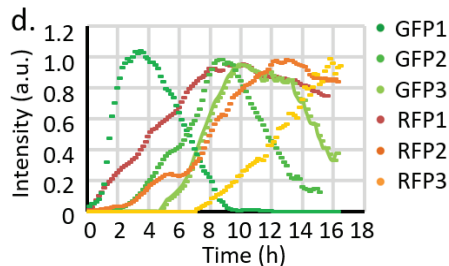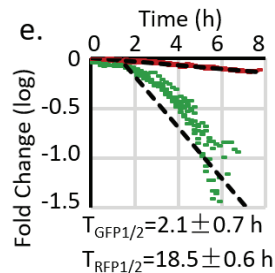

Supplement: supp [file elife-46181-supp-v1.zip]
